# Supplementary material for: Enzymatic Metabolic Switches of Astrocyte Response to Lipotoxicity as Potential Therapeutic Targets for Nervous System Diseases
Source: Pharmaceuticals (Basel). 2024 May 16;17(5):648. doi: 10.3390/ph17050648 (PMC11124372; doi:10.3390/ph17050648)
Supplement: Supplementary file 1 [file pharmaceuticals-17-00648-s001.zip › Table S1.xlsx]

## Sheet: Table S1
source	term_name	term_id	Showed in Figure 2	adjusted_p_value	negative_log10_of_adjusted_p_value	term_size	query_size	intersection_size	effective_domain_size	intersections
GO:CC	peroxisome	GO:0005777	true	7.94e-37	36.1001	144	174	33	22112	P49753,Q8N9L9,O14734,Q99424,O15254,P33121,Q9UKU0,O00116,P21549,Q9UHK6,Q14032,P04040,P43155,Q9BTZ2,Q13011,O75521,P34913,P07148,O15228,Q9UJM8,Q9NYQ3,P35914,P04035,P51659,P12268,Q86WA8,O95822,O00628,O14832,Q9P0Z9,P22307,P29401,Q2T9J0
GO:CC	cytoplasm	GO:0005737	true	5.52e-29	28.258	12321	174	165	22112	Q86V21,P42765,P28330,P16219,P45954,P49748,P24752,Q9BWD1,P49753,Q8N9L9,O14734,Q99424,O15254,P33121,Q9ULC5,Q9UKU0,P55263,P30566,A0A024R5Q7,Q8N142,O00116,P21549,O75891,Q3SY69,P04075,P05062,P09972,Q9UHK6,P23109,Q01433,Q01432,P48728,P05067,P07741,P31939,Q13825,Q14032,P07738,Q6FII3,Q86X55,P04040,Q3L8U1,P50416,Q92523,Q8TCG5,P43155,Q92793,P17812,Q9NRF8,Q16850,Q8NHQ9,Q15392,P00374,Q86XF0,Q9BTZ2,Q15125,Q13…
GO:CC	mitochondrion	GO:0005739	true	2.76e-20	19.5596	1693	174	58	22112	P42765,P28330,P16219,P45954,P49748,P24752,Q9BWD1,P49753,P33121,Q9ULC5,Q9UKU0,A0A024R5Q7,O00116,Q3SY69,Q9UHK6,P48728,Q13825,P04040,P50416,Q92523,Q8TCG5,P43155,P00374,Q86XF0,Q9BTZ2,Q13011,P30084,O75521,Q02790,P23434,P23378,O15228,O95479,Q16836,P40939,P55084,P35914,Q99714,P86397,Q9Y234,A6NK58,O95822,P11586,Q6UB35,P13995,Q9H903,P55809,Q9BYC2,Q9NWU1,P29803,O14832,P14618,P19793,Q9UL12,P22307,O43772,O94…
KEGG	Carbon metabolism	KEGG:01200	true	8.35e-31	30.0782	115	162	35	8091	P16219,P24752,Q9BWD1,O15254,P21549,P04075,P05062,P09972,P48728,P04040,P30084,P06733,P09104,P13929,A6NNW6,P11413,P23434,P23378,P06744,O95479,Q9UJM8,Q9NYQ3,P29803,P18669,P15259,Q8N0Y7,P52209,P30613,P14618,P78330,P37837,P29401,P51854,Q9H0I9,P60174
KEGG	Fatty acid metabolism	KEGG:01212	true	2.98e-26	25.5256	57	162	25	8091	P42765,P28330,P16219,P45954,P49748,P24752,Q9BWD1,O15254,P33121,Q9ULC5,Q9UKU0,P50416,Q92523,Q8TCG5,P30084,P49327,Q16836,P40939,P55084,P51659,P86397,Q9NWU1,P50897,Q9UMR5,P22307
KEGG	Peroxisome	KEGG:04146	true	1.39e-24	23.8561	81	162	27	8091	O14734,Q99424,O15254,P33121,Q9ULC5,Q9UKU0,O00116,P21549,Q9UHK6,Q14032,P04040,P43155,Q9BTZ2,Q13011,O75521,P34913,O15228,Q9UJM8,Q9NYQ3,P35914,Q8TB92,P51659,O95822,O00628,O14832,Q9P0Z9,P22307
KEGG	Fatty acid degradation	KEGG:00071	true	9.73e-20	19.0119	43	162	19	8091	P42765,P28330,P16219,P45954,P49748,P24752,Q9BWD1,O15254,P33121,Q9ULC5,Q9UKU0,P50416,Q92523,Q8TCG5,P30084,O75521,Q16836,P40939,P55084
KEGG	One carbon pool by folate	KEGG:00670	true	3.31e-18	17.4807	20	162	14	8091	O75891,Q3SY69,P48728,P31939,P00374,Q86XF0,P22102,P11586,Q6UB35,P13995,Q9H903,P42898,Q99707,P04818
REAC	Metabolism of lipids	REAC:R-HSA-556833	true	3.89e-40	39.4096	732	157	72	10777	Q86V21,P42765,P28330,P16219,P49748,P24752,Q9BWD1,P49753,Q8N9L9,O14734,Q99424,O15254,P33121,Q9ULC5,Q9UKU0,O00116,Q9UHK6,Q14032,Q86X55,Q3L8U1,P50416,Q92523,P43155,Q92793,Q16850,Q15392,Q15125,P30084,P34913,P07148,P49327,P37268,P14324,O15228,Q16836,P40939,P55084,Q9NYQ3,P35914,Q8TB92,Q01581,P51659,P56937,P86397,Q14739,P48449,Q15648,Q15800,P53602,Q15788,Q14686,P23511,P25208,Q13952,Q15738,P55809,Q9BYC2,…
REAC	Metabolism of steroids	REAC:R-HSA-8957322	true	1.63e-34	33.7877	152	157	38	10777	Q9BWD1,O14734,Q99424,Q9UHK6,Q14032,Q86X55,Q3L8U1,Q92793,Q16850,Q15392,Q15125,P49327,P37268,P14324,Q01581,P51659,P56937,Q14739,P48449,Q15648,Q15800,P53602,Q15788,Q14686,P23511,P25208,Q13952,Q15738,Q07869,P19793,O75845,Q6STE5,Q14534,P36956,Q12772,O60907,Q9BZK7,Q96RS0
REAC	Peroxisomal protein import	REAC:R-HSA-9033241	true	2.49e-28	27.603	60	157	25	10777	P49753,Q8N9L9,O14734,Q99424,O15254,O00116,P21549,Q9UHK6,Q14032,P04040,P43155,Q9BTZ2,Q13011,P34913,O15228,Q9UJM8,Q9NYQ3,P35914,P51659,Q86WA8,O00628,O14832,Q9P0Z9,P22307,Q2T9J0
REAC	Cholesterol biosynthesis	REAC:R-HSA-191273	true	3.03e-23	22.5183	26	157	17	10777	Q9BWD1,Q16850,Q15392,Q15125,P37268,P14324,Q01581,P56937,Q14739,P48449,Q15800,P53602,Q15738,O75845,Q14534,P36956,Q12772
REAC	Fatty acid metabolism	REAC:R-HSA-8978868	true	7.26e-23	22.1392	173	157	31	10777	P42765,P28330,P16219,P49748,P49753,Q8N9L9,O14734,Q99424,O15254,P33121,Q9ULC5,Q9UKU0,Q9UHK6,P50416,Q92523,P43155,P30084,P34913,P49327,Q16836,P40939,P55084,Q9NYQ3,P51659,P86397,O14832,P50897,Q9UMR5,P19793,P22307,O43772
GO:MF	catalytic activity	GO:0003824	false	4.85e-55	54.3142	5691	174	150	20171	Q86V21,P42765,P28330,P16219,P45954,P49748,P24752,Q9BWD1,P49753,Q8N9L9,O14734,Q99424,O15254,P33121,Q9ULC5,Q9UKU0,P55263,P30566,A0A024R5Q7,Q8N142,O00116,P21549,O75891,Q3SY69,P04075,P05062,P09972,Q9UHK6,P23109,Q01433,Q01432,P48728,P07741,P31939,Q13825,Q14032,P07738,Q86X55,P04040,Q3L8U1,P50416,Q92523,Q8TCG5,P43155,Q92793,P17812,Q9NRF8,Q16850,Q8NHQ9,Q15392,P00374,Q86XF0,Q9BTZ2,Q15125,Q13011,P30084,O75…
GO:MF	oxidoreductase activity	GO:0016491	false	1.23e-23	22.9099	753	174	46	20171	P28330,P16219,P45954,P49748,Q99424,O15254,O75891,Q3SY69,P04040,P43155,Q16850,Q15392,P00374,Q86XF0,Q9BTZ2,P49327,P11413,P23378,O95479,Q16836,P40939,P55084,Q9UJM8,Q9NYQ3,P04035,Q99714,P51659,P56937,P20839,P12268,Q14739,P00338,Q15800,P11586,Q6UB35,P13995,Q9H903,P42898,Q15738,P29803,P52209,O14832,Q9P0Z9,Q9UL12,O75845,Q14534
GO:MF	small molecule binding	GO:0036094	false	1.5e-22	21.8249	2527	174	77	20171	Q86V21,P28330,P16219,P45954,P49748,P24752,Q99424,O15254,P33121,Q9ULC5,Q9UKU0,P55263,A0A024R5Q7,Q8N142,O00116,P21549,P04075,P05062,P07741,P04040,Q3L8U1,P17812,Q9NRF8,Q8NHQ9,Q15392,P00374,Q86XF0,O75521,P68104,P22413,P07148,P49327,Q02790,P11413,P22102,P23378,P49915,P06744,Q9BZE4,Q16774,O95479,Q16836,P40939,Q9UJM8,Q9NYQ3,P04035,P00492,P20839,P12268,Q9BY32,Q14739,Q86WA8,P11586,Q6UB35,P42898,Q99707,P53…
GO:MF	nucleotide binding	GO:0000166	false	1.77e-15	14.7513	2178	174	62	20171	Q86V21,P28330,P16219,P45954,P49748,P24752,Q99424,O15254,P33121,Q9ULC5,Q9UKU0,P55263,A0A024R5Q7,Q8N142,O00116,P07741,P04040,Q3L8U1,P17812,Q9NRF8,Q8NHQ9,Q15392,P00374,Q86XF0,O75521,P68104,P22413,Q02790,P11413,P22102,P49915,Q9BZE4,Q16774,O95479,Q16836,P40939,Q9UJM8,Q9NYQ3,P04035,P00492,P20839,P12268,Q9BY32,Q14739,Q86WA8,P11586,Q6UB35,P42898,P53602,Q9BXI3,Q96P26,P49902,Q9H0P0,Q969T7,P21589,P52209,Q9P…
GO:MF	nucleoside phosphate binding	GO:1901265	false	1.81e-15	14.7414	2179	174	62	20171	Q86V21,P28330,P16219,P45954,P49748,P24752,Q99424,O15254,P33121,Q9ULC5,Q9UKU0,P55263,A0A024R5Q7,Q8N142,O00116,P07741,P04040,Q3L8U1,P17812,Q9NRF8,Q8NHQ9,Q15392,P00374,Q86XF0,O75521,P68104,P22413,Q02790,P11413,P22102,P49915,Q9BZE4,Q16774,O95479,Q16836,P40939,Q9UJM8,Q9NYQ3,P04035,P00492,P20839,P12268,Q9BY32,Q14739,Q86WA8,P11586,Q6UB35,P42898,P53602,Q9BXI3,Q96P26,P49902,Q9H0P0,Q969T7,P21589,P52209,Q9P…
GO:MF	lyase activity	GO:0016829	false	6.64e-14	13.1777	207	174	21	20171	P30566,P04075,P05062,P09972,Q13825,P30084,P06733,P09104,P13929,A6NNW6,P49327,P23378,P40939,P55084,P35914,Q8TB92,P51659,P86397,O95822,P53602,P60174
GO:MF	oxidoreductase activity, acting on the CH-NH group of donors	GO:0016645	false	1.83e-13	12.7382	28	174	11	20171	O75891,Q3SY69,P00374,Q86XF0,P11586,Q6UB35,P13995,Q9H903,P42898,Q9P0Z9,Q9UL12
GO:MF	oxidoreductase activity, acting on CH-OH group of donors	GO:0016614	false	2.77e-13	12.5581	144	174	18	20171	Q9BTZ2,P49327,P11413,O95479,Q16836,P40939,P55084,Q9UJM8,Q9NYQ3,P04035,Q99714,P51659,P56937,P20839,P12268,P00338,Q15738,P52209
GO:MF	oxidoreductase activity, acting on the CH-NH group of donors, NAD or NADP as acceptor	GO:0016646	false	6.6e-12	11.1805	18	174	9	20171	O75891,Q3SY69,P00374,Q86XF0,P11586,Q6UB35,P13995,Q9H903,P42898
GO:MF	oxidoreductase activity, acting on the CH-OH group of donors, NAD or NADP as acceptor	GO:0016616	false	1.85e-11	10.7324	131	174	16	20171	Q9BTZ2,P49327,P11413,O95479,Q16836,P40939,P55084,P04035,Q99714,P51659,P56937,P20839,P12268,P00338,Q15738,P52209
GO:MF	acyltransferase activity	GO:0016746	false	3.91e-11	10.4084	251	174	20	20171	P42765,P24752,Q9BWD1,Q14032,P50416,Q92523,Q8TCG5,P43155,Q92793,P49327,O15228,P40939,P55084,Q01581,P86397,Q9Y234,A6NK58,Q15788,Q9NWU1,P22307
GO:MF	acyltransferase activity, transferring groups other than amino-acyl groups	GO:0016747	false	4.35e-11	10.3614	221	174	19	20171	P42765,P24752,Q9BWD1,Q14032,P50416,Q92523,Q8TCG5,P43155,Q92793,P49327,O15228,P40939,P55084,P86397,Q9Y234,A6NK58,Q15788,Q9NWU1,P22307
GO:MF	magnesium ion binding	GO:0000287	false	6.03e-11	10.2199	225	174	19	20171	A0A024R5Q7,Q8N142,P06733,P09104,P13929,A6NNW6,P34913,P35914,P00492,P13995,Q9BXI3,Q96P26,Q9H0P0,Q969T7,P30613,P14618,P78330,P29401,O94811
GO:MF	anion binding	GO:0043168	false	8.41e-11	10.0753	2426	174	58	20171	Q86V21,P28330,P16219,P45954,P49748,P24752,Q99424,O15254,P33121,Q9ULC5,Q9UKU0,P55263,A0A024R5Q7,Q8N142,O00116,P21549,P07741,Q3L8U1,P17812,Q9NRF8,Q8NHQ9,Q15392,P00374,P68104,P22413,P07148,Q02790,P22102,P23378,P49915,Q9BZE4,Q16774,Q16836,P40939,Q9UJM8,Q9NYQ3,P04035,Q14739,Q86WA8,P11586,Q6UB35,P13995,P42898,P53602,P49902,O14832,Q9P0Z9,P30613,P14618,P50897,P51157,P19793,P22307,Q14534,P29401,P51854,Q9H…
GO:MF	identical protein binding	GO:0042802	false	5.13e-10	9.29021	2086	174	52	20171	P28330,P45954,P49748,P24752,Q99424,Q9UKU0,P30566,P21549,P04075,P05062,P23109,Q01433,P05067,P31939,Q6FII3,P04040,P50416,P17812,Q9NRF8,Q9BTZ2,Q15125,P06733,P09104,P22413,P34913,P11413,P23378,Q16836,Q01581,P00492,P51659,P42858,P20839,P12268,Q9BY32,P00338,O95822,Q6UB35,P53602,P49902,P55809,O00628,P15259,P78330,P19793,P80511,Q8IUQ4,O60907,P29401,P60174,O94811,P04818
GO:MF	acetyl-CoA C-acyltransferase activity	GO:0003988	false	1.77e-09	8.75086	7	174	6	20171	P42765,P24752,Q9BWD1,P40939,P55084,P22307
GO:MF	XMP 5'-nucleosidase activity	GO:0106411	false	1.77e-09	8.75086	7	174	6	20171	Q9BXI3,Q96P26,P49902,Q9H0P0,Q969T7,P21589
GO:MF	carbon-oxygen lyase activity	GO:0016835	false	2.84e-09	8.54742	80	174	12	20171	Q13825,P30084,P06733,P09104,P13929,A6NNW6,P49327,P40939,P55084,P51659,P86397,P60174
GO:MF	hydro-lyase activity	GO:0016836	false	4.84e-09	8.31502	64	174	11	20171	Q13825,P30084,P06733,P09104,P13929,A6NNW6,P49327,P40939,P55084,P51659,P86397
GO:MF	isomerase activity	GO:0016853	false	1.46e-08	7.83662	170	174	15	20171	Q9UHK6,P07738,Q15125,Q13011,P30084,O75521,Q02790,Q13451,P06744,P51659,P48449,P18669,P15259,Q8N0Y7,P60174
GO:MF	hydroxymethyl-, formyl- and related transferase activity	GO:0016742	false	1.14e-07	6.94376	11	174	6	20171	O75891,Q3SY69,P48728,P31939,P22102,P23434
GO:MF	transferase activity	GO:0016740	false	1.33e-07	6.87564	2340	174	51	20171	P42765,P24752,Q9BWD1,P55263,O00116,P21549,O75891,Q3SY69,P48728,P07741,P31939,Q14032,Q86X55,P50416,Q92523,Q8TCG5,P43155,Q92793,P49327,P37268,P14324,P22102,P23434,O15228,Q16774,Q16836,P40939,P55084,Q01581,P00492,P86397,Q9Y234,A6NK58,Q99707,Q15788,P49902,Q9H0P0,P55809,Q9BYC2,Q9NWU1,P30613,P14618,O95602,P22307,Q8IUQ4,P37837,Q96RS0,P29401,P51854,Q9H0I9,P04818
GO:MF	oxidoreductase activity, acting on the CH-CH group of donors	GO:0016627	false	1.41e-07	6.84982	65	174	10	20171	P28330,P16219,P45954,P49748,Q99424,O15254,P43155,Q15392,P49327,Q14739
GO:MF	acetyl-CoA C-acetyltransferase activity	GO:0003985	false	1.82e-07	6.74101	6	174	5	20171	P42765,P24752,Q9BWD1,P40939,P55084
GO:MF	ion binding	GO:0043167	false	1.97e-07	6.70462	6079	174	92	20171	Q86V21,P28330,P16219,P45954,P49748,P24752,Q99424,O15254,P33121,Q9ULC5,Q9UKU0,P55263,A0A024R5Q7,Q8N142,O00116,P21549,P23109,Q01433,Q01432,P05067,P07741,P04040,Q3L8U1,Q92793,P17812,Q9NRF8,Q16850,Q8NHQ9,Q15392,P00374,P68104,P06733,P09104,P13929,A6NNW6,P22413,P34913,P07148,P37268,P14324,Q02790,P22102,P23378,P49915,Q9BZE4,Q16774,Q16836,P40939,Q9UJM8,Q9NYQ3,P35914,Q8TB92,P04035,P00492,P20839,P12268,Q9B…
GO:MF	flavin adenine dinucleotide binding	GO:0050660	false	2.23e-07	6.65117	90	174	11	20171	P28330,P16219,P45954,P49748,Q99424,O15254,O00116,Q15392,P42898,Q9P0Z9,Q14534
GO:MF	NADP binding	GO:0050661	false	4.64e-07	6.33305	53	174	9	20171	P04040,P00374,Q86XF0,P11413,O95479,P04035,Q14739,P42898,P52209
GO:MF	C-acetyltransferase activity	GO:0016453	false	6.31e-07	6.19998	7	174	5	20171	P42765,P24752,Q9BWD1,P40939,P55084
GO:MF	3-hydroxyacyl-CoA dehydrogenase activity	GO:0003857	false	6.31e-07	6.19998	7	174	5	20171	Q16836,P40939,P55084,Q99714,P51659
GO:MF	5'-nucleotidase activity	GO:0008253	false	7.24e-07	6.14018	14	174	6	20171	Q9BXI3,Q96P26,P49902,Q9H0P0,Q969T7,P21589
GO:MF	palmitoyl-CoA hydrolase activity	GO:0016290	false	1.90356e-06	5.72043	16	174	6	20171	P42765,P49753,Q8N9L9,O14734,Q14032,P50897
GO:MF	nucleotidase activity	GO:0008252	false	1.90356e-06	5.72043	16	174	6	20171	Q9BXI3,Q96P26,P49902,Q9H0P0,Q969T7,P21589
GO:MF	thiolester hydrolase activity	GO:0016790	false	2.39778e-06	5.62019	44	174	8	20171	P42765,P49753,Q8N9L9,O14734,Q14032,P49327,P50897,Q9UMR5
GO:MF	acetyltransferase activity	GO:0016407	false	3.00455e-06	5.52222	88	174	10	20171	P42765,P24752,Q9BWD1,P43155,Q92793,P49327,O15228,P40939,P55084,Q15788
GO:MF	ligase activity	GO:0016874	false	3.38963e-06	5.46985	178	174	13	20171	Q86V21,P33121,Q9ULC5,Q9UKU0,A0A024R5Q7,Q8N142,P17812,Q9NRF8,P22102,P49915,A6NK58,P11586,Q6UB35
GO:MF	methylenetetrahydrofolate dehydrogenase [NAD(P)+] activity	GO:0004486	false	3.61475e-06	5.44192	4	174	4	20171	P11586,Q6UB35,P13995,Q9H903
GO:MF	methylenetetrahydrofolate dehydrogenase (NADP+) activity	GO:0004488	false	3.61475e-06	5.44192	4	174	4	20171	P11586,Q6UB35,P13995,Q9H903
GO:MF	phosphoglycerate mutase activity	GO:0004619	false	3.61475e-06	5.44192	4	174	4	20171	P07738,P18669,P15259,Q8N0Y7
GO:MF	bisphosphoglycerate mutase activity	GO:0004082	false	3.61475e-06	5.44192	4	174	4	20171	P07738,P18669,P15259,Q8N0Y7
GO:MF	phosphopyruvate hydratase activity	GO:0004634	false	3.61475e-06	5.44192	4	174	4	20171	P06733,P09104,P13929,A6NNW6
GO:MF	enoyl-CoA hydratase activity	GO:0004300	false	7.41434e-06	5.12993	10	174	5	20171	Q13825,P30084,P40939,P55084,P51659
GO:MF	C-acyltransferase activity	GO:0016408	false	8.95348e-06	5.04801	20	174	6	20171	P42765,P24752,Q9BWD1,P40939,P55084,P22307
GO:MF	ligase activity, forming carbon-nitrogen bonds	GO:0016879	false	9.60119e-06	5.01768	52	174	8	20171	A0A024R5Q7,Q8N142,P17812,Q9NRF8,P22102,P49915,P11586,Q6UB35
GO:MF	purine nucleotide binding	GO:0017076	false	1.11205e-05	4.95388	2020	174	43	20171	Q86V21,P28330,P49748,P24752,P33121,Q9ULC5,Q9UKU0,P55263,A0A024R5Q7,Q8N142,P07741,P04040,Q3L8U1,P17812,Q9NRF8,Q8NHQ9,P00374,Q86XF0,O75521,P68104,P22413,Q02790,P11413,P22102,P49915,Q9BZE4,Q16774,O95479,Q16836,P40939,P04035,Q14739,Q86WA8,P11586,Q6UB35,P42898,P53602,P49902,P52209,P30613,P14618,P51157,P22307
GO:MF	hydrolase activity, acting on carbon-nitrogen (but not peptide) bonds, in cyclic amidines	GO:0016814	false	1.43854e-05	4.84208	36	174	7	20171	P23109,Q01433,Q01432,P31939,P11586,P13995,Q9H903
GO:MF	adenyl nucleotide binding	GO:0030554	false	1.50139e-05	4.82351	1664	174	38	20171	Q86V21,P28330,P49748,P24752,P33121,Q9ULC5,Q9UKU0,P55263,P07741,P04040,Q3L8U1,P17812,Q9NRF8,Q8NHQ9,P00374,Q86XF0,O75521,P22413,Q02790,P11413,P22102,P49915,Q16774,O95479,Q16836,P40939,P04035,Q14739,Q86WA8,P11586,Q6UB35,P42898,P53602,P49902,P52209,P30613,P14618,P22307
GO:MF	acyl-CoA hydrolase activity	GO:0047617	false	1.69906e-05	4.76979	22	174	6	20171	P42765,P49753,Q8N9L9,O14734,Q14032,P50897
GO:MF	transketolase or transaldolase activity	GO:0016744	false	1.79518e-05	4.74589	5	174	4	20171	P37837,P29401,P51854,Q9H0I9
GO:MF	cyclohydrolase activity	GO:0019238	false	1.79518e-05	4.74589	5	174	4	20171	P31939,P11586,P13995,Q9H903
GO:MF	heterocyclic compound binding	GO:1901363	false	1.98752e-05	4.70169	7463	174	100	20171	Q86V21,P42765,P28330,P16219,P45954,P49748,P24752,Q99424,O15254,P33121,Q9ULC5,Q9UKU0,P55263,A0A024R5Q7,Q8N142,O00116,P21549,P04075,P05067,P07741,Q13825,Q86X55,P04040,Q3L8U1,Q92793,P17812,Q9NRF8,Q16850,Q8NHQ9,Q15392,P00374,Q86XF0,O75521,P68104,P06733,P22413,P07148,P49327,P14324,Q02790,Q13451,P11413,P22102,P23378,P49915,Q9BZE4,Q16774,O95479,Q16836,P40939,P55084,Q9UJM8,Q9NYQ3,P04035,P00492,Q99714,P20…
GO:MF	CoA hydrolase activity	GO:0016289	false	3.02142e-05	4.51979	24	174	6	20171	P42765,P49753,Q8N9L9,O14734,Q14032,P50897
GO:MF	carnitine O-acyltransferase activity	GO:0016406	false	5.34924e-05	4.27171	6	174	4	20171	P50416,Q92523,Q8TCG5,P43155
GO:MF	myristoyl-CoA hydrolase activity	GO:0102991	false	5.72762e-05	4.24203	14	174	5	20171	P42765,P49753,Q8N9L9,O14734,Q14032
GO:MF	organic cyclic compound binding	GO:0097159	false	8.0018e-05	4.09681	7536	174	99	20171	Q86V21,P42765,P28330,P16219,P45954,P49748,P24752,Q99424,O15254,P33121,Q9ULC5,Q9UKU0,P55263,A0A024R5Q7,Q8N142,O00116,P21549,P04075,P05067,P07741,Q13825,Q86X55,P04040,Q3L8U1,Q92793,P17812,Q9NRF8,Q16850,Q8NHQ9,Q15392,P00374,Q86XF0,O75521,P68104,P06733,P22413,P49327,P14324,Q02790,Q13451,P11413,P22102,P23378,P49915,Q9BZE4,Q16774,O95479,Q16836,P40939,P55084,Q9UJM8,Q9NYQ3,P04035,P00492,Q99714,P20839,P12…
GO:MF	acyl-CoA oxidase activity	GO:0003997	false	0.000123974	3.90667	7	174	4	20171	P28330,Q99424,O15254,P43155
GO:MF	carbon-carbon lyase activity	GO:0016830	false	0.000155506	3.80825	50	174	7	20171	P04075,P05062,P09972,P35914,Q8TB92,O95822,P53602
GO:MF	methenyltetrahydrofolate cyclohydrolase activity	GO:0004477	false	0.000426329	3.37026	3	174	3	20171	P11586,P13995,Q9H903
GO:MF	adenosine-phosphate deaminase activity	GO:0047623	false	0.000426329	3.37026	3	174	3	20171	P23109,Q01433,Q01432
GO:MF	methylenetetrahydrofolate dehydrogenase (NAD+) activity	GO:0004487	false	0.000426329	3.37026	3	174	3	20171	P11586,P13995,Q9H903
GO:MF	AMP deaminase activity	GO:0003876	false	0.000426329	3.37026	3	174	3	20171	P23109,Q01433,Q01432
GO:MF	fructose-bisphosphate aldolase activity	GO:0004332	false	0.000426329	3.37026	3	174	3	20171	P04075,P05062,P09972
GO:MF	transketolase activity	GO:0004802	false	0.000426329	3.37026	3	174	3	20171	P29401,P51854,Q9H0I9
GO:MF	vitamin binding	GO:0019842	false	0.000491891	3.30813	150	174	10	20171	P21549,P00374,P49327,P23378,Q99707,O14832,P29401,P51854,Q9H0I9,P04818
GO:MF	fatty-acyl-CoA binding	GO:0000062	false	0.000554356	3.25621	21	174	5	20171	P28330,P49748,O75521,P40939,P22307
GO:MF	fatty acid derivative binding	GO:1901567	false	0.000712405	3.14727	22	174	5	20171	P28330,P49748,O75521,P40939,P22307
GO:MF	FAD binding	GO:0071949	false	0.000768542	3.11433	40	174	6	20171	Q99424,O15254,O00116,Q15392,P42898,Q14534
GO:MF	acyl-CoA binding	GO:0120227	false	0.00113389	2.94543	24	174	5	20171	P28330,P49748,O75521,P40939,P22307
GO:MF	oxidoreductase activity, acting on the CH-CH group of donors, oxygen as acceptor	GO:0016634	false	0.00113772	2.94396	11	174	4	20171	P28330,Q99424,O15254,P43155
GO:MF	intramolecular transferase activity, phosphotransferases	GO:0016868	false	0.00113772	2.94396	11	174	4	20171	P07738,P18669,P15259,Q8N0Y7
GO:MF	carnitine O-palmitoyltransferase activity	GO:0004095	false	0.00169447	2.77097	4	174	3	20171	P50416,Q92523,Q8TCG5
GO:MF	oxidoreductase activity, acting on the CH-CH group of donors, with a flavin as acceptor	GO:0052890	false	0.00169509	2.77081	12	174	4	20171	P28330,P16219,P45954,P49748
GO:MF	acyl-CoA dehydrogenase activity	GO:0003995	false	0.00169509	2.77081	12	174	4	20171	P28330,P16219,P45954,P49748
GO:MF	protein homodimerization activity	GO:0042803	false	0.00193077	2.71427	701	174	20	20171	Q99424,Q9UKU0,P21549,P31939,P04040,P06733,P22413,P34913,P11413,P23378,Q01581,P51659,Q6UB35,P53602,O00628,P78330,P29401,P60174,O94811,P04818
GO:MF	monosaccharide binding	GO:0048029	false	0.00235467	2.62807	74	174	7	20171	P04075,P05062,P11413,P06744,O14832,P30613,P37837
GO:MF	intramolecular transferase activity	GO:0016866	false	0.0025496	2.59353	28	174	5	20171	P07738,P48449,P18669,P15259,Q8N0Y7
GO:MF	intramolecular oxidoreductase activity	GO:0016860	false	0.0041895	2.37784	53	174	6	20171	Q15125,Q13011,P30084,O75521,P06744,P60174
GO:MF	O-palmitoyltransferase activity	GO:0016416	false	0.00420925	2.3758	5	174	3	20171	P50416,Q92523,Q8TCG5
GO:MF	protein dimerization activity	GO:0046983	false	0.0049324	2.30694	1088	174	25	20171	Q99424,Q9UKU0,P21549,P31939,P04040,P06733,P22413,P34913,P11413,P23378,Q01581,P51659,Q6UB35,P53602,Q15788,P25208,Q13952,O00628,P78330,P36956,Q12772,P29401,P60174,O94811,P04818
GO:MF	ribonucleotide binding	GO:0032553	false	0.00495993	2.30452	1934	174	36	20171	Q86V21,P28330,P49748,P24752,P33121,Q9ULC5,Q9UKU0,P55263,A0A024R5Q7,Q8N142,P07741,Q3L8U1,P17812,Q9NRF8,Q8NHQ9,O75521,P68104,P22413,Q02790,P22102,P49915,Q9BZE4,Q16774,P40939,Q9UJM8,Q9NYQ3,P04035,Q86WA8,P11586,Q6UB35,P53602,P49902,P30613,P14618,P51157,P22307
GO:MF	amide binding	GO:0033218	false	0.00691572	2.16016	400	174	14	20171	P28330,P49748,P04040,Q15392,P00374,O75521,P49327,Q02790,Q13451,P40939,O00628,P19793,P22307,P04818
GO:MF	intramolecular oxidoreductase activity, transposing C=C bonds	GO:0016863	false	0.00787967	2.10349	17	174	4	20171	Q15125,Q13011,P30084,O75521
GO:MF	carboxylic acid binding	GO:0031406	false	0.0122222	1.91285	171	174	9	20171	Q99424,O15254,P00374,P07148,P23378,O14832,P19793,P22307,P04818
GO:MF	carbohydrate derivative binding	GO:0097367	false	0.016759	1.77575	2300	174	39	20171	Q86V21,P28330,P49748,P24752,P33121,Q9ULC5,Q9UKU0,P55263,A0A024R5Q7,Q8N142,P05067,P07741,Q3L8U1,P17812,Q9NRF8,Q8NHQ9,O75521,P68104,P22413,Q02790,P22102,P49915,P06744,Q9BZE4,Q16774,P40939,Q9UJM8,Q9NYQ3,P04035,Q86WA8,P11586,Q6UB35,P53602,P49902,P30613,P14618,P50897,P51157,P22307
GO:MF	hydrolase activity, acting on carbon-nitrogen (but not peptide) bonds	GO:0016810	false	0.019014	1.72093	139	174	8	20171	P23109,Q01433,Q01432,P31939,P04040,P11586,P13995,Q9H903
GO:MF	organic acid binding	GO:0043177	false	0.0200199	1.69854	140	174	8	20171	P21549,P00374,P07148,P23378,O14832,P19793,P22307,P04818
GO:MF	hydrolase activity	GO:0016787	false	0.0216112	1.66532	2413	174	40	20171	P42765,P49753,Q8N9L9,O14734,P23109,Q01433,Q01432,P31939,Q14032,P07738,P04040,Q3L8U1,Q8NHQ9,P68104,P22413,P34913,P49327,P49915,Q9BZE4,O95479,Q9BY32,Q86WA8,P11586,P13995,Q9H903,Q9BXI3,Q96P26,P49902,Q9H0P0,Q969T7,P21589,P18669,P15259,Q8N0Y7,P50897,Q9UMR5,P78330,P51157,O94811,Q2T9J0
GO:MF	thiamine pyrophosphate binding	GO:0030976	false	0.0231255	1.63591	8	174	3	20171	P29401,P51854,Q9H0I9
GO:MF	purine ribonucleotide binding	GO:0032555	false	0.0255059	1.59336	1917	174	34	20171	Q86V21,P28330,P49748,P24752,P33121,Q9ULC5,Q9UKU0,P55263,A0A024R5Q7,Q8N142,P07741,Q3L8U1,P17812,Q9NRF8,Q8NHQ9,O75521,P68104,P22413,Q02790,P22102,P49915,Q9BZE4,Q16774,P40939,P04035,Q86WA8,P11586,Q6UB35,P53602,P49902,P30613,P14618,P51157,P22307
GO:MF	transferase activity, transferring one-carbon groups	GO:0016741	false	0.0271189	1.56673	236	174	10	20171	O75891,Q3SY69,P48728,P31939,Q86X55,P22102,P23434,Q99707,Q96RS0,P04818
GO:MF	transcription coregulator binding	GO:0001221	false	0.0360237	1.44341	112	174	7	20171	Q92793,P06733,Q15648,Q07869,P19793,Q6STE5,P36956
GO:MF	adenyl ribonucleotide binding	GO:0032559	false	0.0475778	1.3226	1563	174	29	20171	Q86V21,P28330,P49748,P24752,P33121,Q9ULC5,Q9UKU0,P55263,P07741,Q3L8U1,P17812,Q9NRF8,Q8NHQ9,O75521,P22413,Q02790,P22102,P49915,Q16774,P40939,P04035,Q86WA8,P11586,Q6UB35,P53602,P49902,P30613,P14618,P22307
GO:MF	aldehyde-lyase activity	GO:0016832	false	0.0489277	1.31045	10	174	3	20171	P04075,P05062,P09972
GO:MF	dihydrofolate reductase activity	GO:0004146	false	0.049992	1.3011	2	174	2	20171	P00374,Q86XF0
GO:MF	3-hydroxypalmitoyl-[acyl-carrier-protein] dehydratase activity	GO:0004317	false	0.049992	1.3011	2	174	2	20171	P49327,P86397
GO:MF	CTP synthase activity	GO:0003883	false	0.049992	1.3011	2	174	2	20171	P17812,Q9NRF8
GO:MF	3-oxoacyl-[acyl-carrier-protein] synthase activity	GO:0004315	false	0.049992	1.3011	2	174	2	20171	P49327,Q9NWU1
GO:MF	adenylosuccinate synthase activity	GO:0004019	false	0.049992	1.3011	2	174	2	20171	A0A024R5Q7,Q8N142
GO:MF	formate-tetrahydrofolate ligase activity	GO:0004329	false	0.049992	1.3011	2	174	2	20171	P11586,Q6UB35
GO:MF	succinyl-CoA:3-oxo-acid CoA-transferase activity	GO:0008260	false	0.049992	1.3011	2	174	2	20171	P55809,Q9BYC2
GO:MF	glucose-6-phosphate dehydrogenase activity	GO:0004345	false	0.049992	1.3011	2	174	2	20171	P11413,O95479
GO:MF	hydroxymethylglutaryl-CoA lyase activity	GO:0004419	false	0.049992	1.3011	2	174	2	20171	P35914,Q8TB92
GO:MF	pyruvate kinase activity	GO:0004743	false	0.049992	1.3011	2	174	2	20171	P30613,P14618
GO:MF	succinyl-CoA hydrolase activity	GO:0004778	false	0.049992	1.3011	2	174	2	20171	Q8N9L9,O14734
GO:MF	(3R)-hydroxymyristoyl-[acyl-carrier-protein] dehydratase activity	GO:0008659	false	0.049992	1.3011	2	174	2	20171	P49327,P86397
GO:MF	3-hydroxydecanoyl-[acyl-carrier-protein] dehydratase activity	GO:0008693	false	0.049992	1.3011	2	174	2	20171	P49327,P86397
GO:MF	3-hydroxyacyl-[acyl-carrier-protein] dehydratase activity	GO:0019171	false	0.049992	1.3011	2	174	2	20171	P49327,P86397
GO:MF	purine phosphoribosyltransferase activity	GO:0106130	false	0.049992	1.3011	2	174	2	20171	P07741,P00492
GO:MF	medium-chain acyl-CoA hydrolase activity	GO:0052815	false	0.049992	1.3011	2	174	2	20171	O14734,Q14032
GO:MF	3-hydroxyoctanoyl-[acyl-carrier-protein] dehydratase activity	GO:0047451	false	0.049992	1.3011	2	174	2	20171	P49327,P86397
GO:MF	2,3-bisphosphoglycerate-dependent phosphoglycerate mutase activity	GO:0046538	false	0.049992	1.3011	2	174	2	20171	P18669,P15259
GO:MF	glutaryl-CoA hydrolase activity	GO:0044466	false	0.049992	1.3011	2	174	2	20171	Q8N9L9,O14734
GO:MF	choloyl-CoA hydrolase activity	GO:0033882	false	0.049992	1.3011	2	174	2	20171	O14734,Q14032
GO:MF	coenzyme A binding	GO:0120225	false	0.049992	1.3011	2	174	2	20171	P24752,P04035
GO:MF	formyltetrahydrofolate dehydrogenase activity	GO:0016155	false	0.049992	1.3011	2	174	2	20171	O75891,Q3SY69
GO:BP	small molecule metabolic process	GO:0044281	false	1.57e-115	114.805	1857	172	141	21128	Q86V21,P42765,P28330,P16219,P45954,P49748,P24752,Q9BWD1,P49753,Q8N9L9,O14734,Q99424,O15254,P33121,Q9ULC5,Q9UKU0,P55263,P30566,A0A024R5Q7,Q8N142,O00116,P21549,O75891,Q3SY69,P04075,P05062,P09972,Q9UHK6,P23109,Q01433,Q01432,P48728,P05067,P07741,P31939,Q13825,Q14032,P07738,P04040,P50416,Q92523,Q8TCG5,P43155,P17812,Q9NRF8,Q16850,Q15392,P00374,Q86XF0,Q9BTZ2,Q15125,Q13011,P30084,O75521,P06733,P09104,P13…
GO:BP	oxoacid metabolic process	GO:0043436	false	9.17e-78	77.0379	971	172	95	21128	Q86V21,P42765,P28330,P16219,P45954,P49748,P24752,Q9BWD1,P49753,Q8N9L9,O14734,Q99424,O15254,P33121,Q9ULC5,Q9UKU0,A0A024R5Q7,O00116,P21549,O75891,Q3SY69,P04075,P05062,P09972,Q9UHK6,P48728,P05067,P31939,Q13825,Q14032,P07738,P50416,Q92523,Q8TCG5,P43155,P17812,Q9NRF8,P00374,Q86XF0,Q13011,P30084,O75521,P06733,P09104,P13929,A6NNW6,P22413,P07148,P49327,P22102,P23434,P23378,P49915,O15228,P06744,Q16836,P40…
GO:BP	organic acid metabolic process	GO:0006082	false	1.83e-77	76.7377	978	172	95	21128	Q86V21,P42765,P28330,P16219,P45954,P49748,P24752,Q9BWD1,P49753,Q8N9L9,O14734,Q99424,O15254,P33121,Q9ULC5,Q9UKU0,A0A024R5Q7,O00116,P21549,O75891,Q3SY69,P04075,P05062,P09972,Q9UHK6,P48728,P05067,P31939,Q13825,Q14032,P07738,P50416,Q92523,Q8TCG5,P43155,P17812,Q9NRF8,P00374,Q86XF0,Q13011,P30084,O75521,P06733,P09104,P13929,A6NNW6,P22413,P07148,P49327,P22102,P23434,P23378,P49915,O15228,P06744,Q16836,P40…
GO:BP	carboxylic acid metabolic process	GO:0019752	false	1.93e-77	76.7144	945	172	94	21128	Q86V21,P42765,P28330,P16219,P45954,P49748,P24752,Q9BWD1,P49753,Q8N9L9,O14734,Q99424,O15254,P33121,Q9ULC5,Q9UKU0,A0A024R5Q7,O00116,P21549,O75891,Q3SY69,P04075,P05062,P09972,Q9UHK6,P48728,P05067,P31939,Q13825,Q14032,P07738,P50416,Q92523,Q8TCG5,P43155,P17812,Q9NRF8,P00374,Q86XF0,Q13011,P30084,O75521,P06733,P09104,P13929,A6NNW6,P07148,P49327,P22102,P23434,P23378,P49915,O15228,P06744,Q16836,P40939,P55…
GO:BP	nucleotide metabolic process	GO:0009117	false	1.89e-65	64.724	621	172	75	21128	P42765,P24752,P49753,Q8N9L9,O14734,P33121,Q9ULC5,Q9UKU0,P55263,P30566,A0A024R5Q7,Q8N142,O00116,O75891,Q3SY69,P04075,P05062,P09972,P23109,Q01433,Q01432,P05067,P07741,P31939,Q14032,P07738,P17812,Q9NRF8,P06733,P09104,P13929,A6NNW6,P22413,P11413,P22102,P49915,P06744,Q16774,O95479,P04035,Q01581,P00492,P51659,P86397,P20839,P12268,Q9BY32,P00338,O95822,P11586,Q9H903,Q99707,P53602,Q9BXI3,Q96P26,P49902,Q9H…
GO:BP	nucleoside phosphate metabolic process	GO:0006753	false	6.45e-65	64.1905	631	172	75	21128	P42765,P24752,P49753,Q8N9L9,O14734,P33121,Q9ULC5,Q9UKU0,P55263,P30566,A0A024R5Q7,Q8N142,O00116,O75891,Q3SY69,P04075,P05062,P09972,P23109,Q01433,Q01432,P05067,P07741,P31939,Q14032,P07738,P17812,Q9NRF8,P06733,P09104,P13929,A6NNW6,P22413,P11413,P22102,P49915,P06744,Q16774,O95479,P04035,Q01581,P00492,P51659,P86397,P20839,P12268,Q9BY32,P00338,O95822,P11586,Q9H903,Q99707,P53602,Q9BXI3,Q96P26,P49902,Q9H…
GO:BP	nucleobase-containing small molecule metabolic process	GO:0055086	false	2.68e-64	63.5716	700	172	77	21128	P42765,P24752,P49753,Q8N9L9,O14734,P33121,Q9ULC5,Q9UKU0,P55263,P30566,A0A024R5Q7,Q8N142,O00116,O75891,Q3SY69,P04075,P05062,P09972,P23109,Q01433,Q01432,P05067,P07741,P31939,Q14032,P07738,P17812,Q9NRF8,Q86XF0,P06733,P09104,P13929,A6NNW6,P22413,P11413,P22102,P49915,O15228,P06744,Q16774,O95479,P04035,Q01581,P00492,P51659,P86397,P20839,P12268,Q9BY32,P00338,O95822,P11586,Q9H903,Q99707,P53602,Q9BXI3,Q96…
GO:BP	purine nucleotide metabolic process	GO:0006163	false	1.16e-61	60.9355	557	172	70	21128	P42765,P24752,P49753,Q8N9L9,O14734,P33121,Q9ULC5,Q9UKU0,P55263,P30566,A0A024R5Q7,Q8N142,O00116,O75891,Q3SY69,P04075,P05062,P09972,P23109,Q01433,Q01432,P05067,P07741,P31939,Q14032,P07738,P06733,P09104,P13929,A6NNW6,P22413,P11413,P22102,P49915,P06744,Q16774,O95479,P04035,Q01581,P00492,P51659,P86397,P20839,P12268,Q9BY32,P00338,O95822,P11586,Q9H903,Q99707,P53602,Q9BXI3,Q96P26,P49902,P21589,Q9NWU1,P29…
GO:BP	purine-containing compound metabolic process	GO:0072521	false	5.02e-60	59.2997	587	172	70	21128	P42765,P24752,P49753,Q8N9L9,O14734,P33121,Q9ULC5,Q9UKU0,P55263,P30566,A0A024R5Q7,Q8N142,O00116,O75891,Q3SY69,P04075,P05062,P09972,P23109,Q01433,Q01432,P05067,P07741,P31939,Q14032,P07738,P06733,P09104,P13929,A6NNW6,P22413,P11413,P22102,P49915,P06744,Q16774,O95479,P04035,Q01581,P00492,P51659,P86397,P20839,P12268,Q9BY32,P00338,O95822,P11586,Q9H903,Q99707,P53602,Q9BXI3,Q96P26,P49902,P21589,Q9NWU1,P29…
GO:BP	ribose phosphate metabolic process	GO:0019693	false	9.58e-60	59.0186	489	172	66	21128	P42765,P24752,P49753,Q8N9L9,O14734,P33121,Q9ULC5,Q9UKU0,P55263,P30566,A0A024R5Q7,Q8N142,O00116,P04075,P05062,P09972,P23109,Q01433,Q01432,P05067,P07741,P31939,Q14032,P07738,P17812,Q9NRF8,P06733,P09104,P13929,A6NNW6,P22413,P11413,P22102,P49915,P06744,Q16774,P04035,Q01581,P00492,P51659,P86397,P20839,P12268,Q9BY32,P00338,O95822,P11586,Q99707,P53602,Q9BXI3,P49902,Q9H0P0,P21589,Q9NWU1,P29803,P18669,P15…
GO:BP	monocarboxylic acid metabolic process	GO:0032787	false	2.22e-58	57.654	619	172	70	21128	Q86V21,P42765,P28330,P16219,P45954,P49748,P24752,Q9BWD1,P49753,Q8N9L9,O14734,Q99424,O15254,P33121,Q9ULC5,Q9UKU0,O00116,P21549,Q3SY69,P04075,P05062,P09972,Q9UHK6,P05067,Q13825,Q14032,P07738,P50416,Q92523,Q8TCG5,P43155,Q13011,P30084,O75521,P06733,P09104,P13929,A6NNW6,P07148,P49327,O15228,P06744,Q16836,P40939,P55084,Q9UJM8,Q9NYQ3,Q99714,P51659,P86397,P00338,Q86WA8,O95822,Q15800,Q6UB35,Q9NWU1,P29803,…
GO:BP	ribonucleotide metabolic process	GO:0009259	false	2.44e-57	56.612	480	172	64	21128	P42765,P24752,P49753,Q8N9L9,O14734,P33121,Q9ULC5,Q9UKU0,P55263,P30566,A0A024R5Q7,Q8N142,O00116,P04075,P05062,P09972,P23109,Q01433,Q01432,P05067,P07741,P31939,Q14032,P07738,P17812,Q9NRF8,P06733,P09104,P13929,A6NNW6,P22413,P22102,P49915,P06744,Q16774,P04035,Q01581,P00492,P51659,P86397,P20839,P12268,Q9BY32,P00338,O95822,P11586,Q99707,P53602,Q9BXI3,P49902,Q9H0P0,P21589,Q9NWU1,P29803,P18669,P15259,Q8N…
GO:BP	purine ribonucleotide metabolic process	GO:0009150	false	2.5e-54	53.602	457	172	61	21128	P42765,P24752,P49753,Q8N9L9,O14734,P33121,Q9ULC5,Q9UKU0,P55263,P30566,A0A024R5Q7,Q8N142,O00116,P04075,P05062,P09972,P23109,Q01433,Q01432,P05067,P07741,P31939,Q14032,P07738,P06733,P09104,P13929,A6NNW6,P22413,P22102,P49915,P06744,Q16774,P04035,Q01581,P00492,P51659,P86397,P20839,P12268,Q9BY32,P00338,O95822,P11586,Q99707,P53602,Q9BXI3,P49902,P21589,Q9NWU1,P29803,P18669,P15259,Q8N0Y7,Q9P0Z9,P30613,P14…
GO:BP	organophosphate metabolic process	GO:0019637	false	3.43e-54	53.4645	1060	172	80	21128	P42765,P24752,P49753,Q8N9L9,O14734,P33121,Q9ULC5,Q9UKU0,P55263,P30566,A0A024R5Q7,Q8N142,O00116,O75891,Q3SY69,P04075,P05062,P09972,P23109,Q01433,Q01432,P05067,P07741,P31939,Q14032,P07738,P17812,Q9NRF8,P06733,P09104,P13929,A6NNW6,P22413,P37268,P14324,P11413,P22102,P49915,O15228,P06744,Q16774,O95479,P40939,P04035,Q01581,P00492,P51659,P86397,P20839,P12268,Q9BY32,P00338,O95822,P11586,Q9H903,Q99707,P53…
GO:BP	small molecule catabolic process	GO:0044282	false	4.2e-51	50.3768	391	172	56	21128	P42765,P28330,P16219,P45954,P49748,P24752,Q9BWD1,Q8N9L9,O14734,Q99424,O15254,P21549,O75891,Q3SY69,P05062,Q9UHK6,P48728,Q13825,P50416,Q92523,Q8TCG5,P43155,Q13011,P30084,O75521,P06733,P09104,P13929,P07148,P23434,P23378,Q16836,P40939,P55084,Q9UJM8,P35914,Q8TB92,Q99714,P51659,Q86WA8,O95822,Q99707,P55809,Q9BYC2,O00628,P15259,P52209,O14832,Q9P0Z9,P14618,Q07869,Q9UL12,P22307,P51854,P60174,Q2T9J0
GO:BP	carboxylic acid catabolic process	GO:0046395	false	1.2e-46	45.9214	246	172	46	21128	P42765,P28330,P16219,P45954,P49748,P24752,Q9BWD1,Q8N9L9,O14734,Q99424,O15254,P21549,O75891,Q3SY69,Q9UHK6,P48728,Q13825,P50416,Q92523,Q8TCG5,P43155,Q13011,P30084,O75521,P07148,P23434,P23378,Q16836,P40939,P55084,Q9UJM8,P35914,Q8TB92,Q99714,P51659,Q86WA8,O95822,Q99707,O00628,P52209,O14832,Q9P0Z9,Q07869,Q9UL12,P22307,Q2T9J0
GO:BP	organic acid catabolic process	GO:0016054	false	2.65e-46	45.5761	250	172	46	21128	P42765,P28330,P16219,P45954,P49748,P24752,Q9BWD1,Q8N9L9,O14734,Q99424,O15254,P21549,O75891,Q3SY69,Q9UHK6,P48728,Q13825,P50416,Q92523,Q8TCG5,P43155,Q13011,P30084,O75521,P07148,P23434,P23378,Q16836,P40939,P55084,Q9UJM8,P35914,Q8TB92,Q99714,P51659,Q86WA8,O95822,Q99707,O00628,P52209,O14832,Q9P0Z9,Q07869,Q9UL12,P22307,Q2T9J0
GO:BP	lipid metabolic process	GO:0006629	false	1.45e-44	43.84	1413	172	80	21128	Q86V21,P42765,P28330,P16219,P45954,P49748,P24752,Q9BWD1,P49753,Q8N9L9,O14734,Q99424,O15254,P33121,Q9ULC5,Q9UKU0,O00116,Q3SY69,Q9UHK6,P05067,Q13825,Q14032,Q6FII3,P04040,P50416,Q92523,Q8TCG5,P43155,Q16850,Q15392,Q9BTZ2,Q15125,Q13011,P30084,O75521,P34913,P07148,P49327,P37268,P14324,P11413,O15228,O95479,Q16836,P40939,P55084,Q9UJM8,Q9NYQ3,P35914,Q8TB92,P04035,Q01581,Q99714,P51659,P56937,P86397,Q14739,…
GO:BP	small molecule biosynthetic process	GO:0044283	false	6.77e-44	43.1696	581	172	58	21128	Q86V21,P42765,P28330,P49748,P24752,Q8N9L9,O14734,P55263,O00116,P21549,P09972,Q9UHK6,P07741,Q14032,Q16850,Q15392,P00374,Q86XF0,Q15125,P09104,P49327,P37268,P14324,P11413,O15228,P06744,O95479,Q9UJM8,P35914,Q8TB92,P04035,Q01581,P00492,Q99714,P56937,P86397,Q14739,P48449,O95822,Q15800,P11586,Q6UB35,Q9H903,P42898,Q99707,P53602,Q15738,P21589,Q9NWU1,P15259,P52209,P30613,Q07869,P78330,O75845,P22307,P36956,…
GO:BP	carbohydrate derivative metabolic process	GO:1901135	false	6.85e-44	43.1641	1125	172	73	21128	P42765,P24752,P49753,Q8N9L9,O14734,P33121,Q9ULC5,Q9UKU0,P55263,P30566,A0A024R5Q7,Q8N142,O00116,P04075,P05062,P09972,P23109,Q01433,Q01432,P05067,P07741,P31939,Q14032,P07738,P17812,Q9NRF8,Q86XF0,P06733,P09104,P13929,A6NNW6,P22413,P11413,P22102,P49915,O15228,P06744,Q16774,O95479,P04035,Q01581,P00492,P51659,P86397,P20839,P12268,Q9BY32,P00338,O95822,P11586,Q99707,P53602,Q9BXI3,Q96P26,P49902,Q9H0P0,P21…
GO:BP	fatty acid beta-oxidation	GO:0006635	false	2.59e-42	41.5869	76	172	31	21128	P42765,P28330,P16219,P49748,P24752,Q9BWD1,O14734,Q99424,O15254,Q3SY69,Q9UHK6,Q13825,P50416,Q92523,Q8TCG5,P43155,Q13011,P30084,O75521,P07148,Q16836,P40939,P55084,Q99714,P51659,Q86WA8,O95822,O00628,Q07869,P22307,Q2T9J0
GO:BP	fatty acid oxidation	GO:0019395	false	1.9e-41	40.7217	112	172	34	21128	P42765,P28330,P16219,P49748,P24752,Q9BWD1,O14734,Q99424,O15254,Q3SY69,Q9UHK6,Q13825,P50416,Q92523,Q8TCG5,P43155,Q13011,P30084,O75521,P07148,Q16836,P40939,P55084,Q9UJM8,Q9NYQ3,Q99714,P51659,Q86WA8,O95822,O00628,O14832,Q07869,P22307,Q2T9J0
GO:BP	fatty acid catabolic process	GO:0009062	false	2.27e-41	40.6441	101	172	33	21128	P42765,P28330,P16219,P49748,P24752,Q9BWD1,O14734,Q99424,O15254,Q3SY69,Q9UHK6,Q13825,P50416,Q92523,Q8TCG5,P43155,Q13011,P30084,O75521,P07148,Q16836,P40939,P55084,Q9UJM8,Q99714,P51659,Q86WA8,O95822,O00628,O14832,Q07869,P22307,Q2T9J0
GO:BP	monocarboxylic acid catabolic process	GO:0072329	false	3.3e-41	40.4819	126	172	35	21128	P42765,P28330,P16219,P49748,P24752,Q9BWD1,O14734,Q99424,O15254,P21549,Q3SY69,Q9UHK6,Q13825,P50416,Q92523,Q8TCG5,P43155,Q13011,P30084,O75521,P07148,Q16836,P40939,P55084,Q9UJM8,Q99714,P51659,Q86WA8,O95822,O00628,P52209,O14832,Q07869,P22307,Q2T9J0
GO:BP	lipid oxidation	GO:0034440	false	1.06e-40	39.9744	117	172	34	21128	P42765,P28330,P16219,P49748,P24752,Q9BWD1,O14734,Q99424,O15254,Q3SY69,Q9UHK6,Q13825,P50416,Q92523,Q8TCG5,P43155,Q13011,P30084,O75521,P07148,Q16836,P40939,P55084,Q9UJM8,Q9NYQ3,Q99714,P51659,Q86WA8,O95822,O00628,O14832,Q07869,P22307,Q2T9J0
GO:BP	fatty acid metabolic process	GO:0006631	false	2.13e-39	38.672	397	172	48	21128	Q86V21,P42765,P28330,P16219,P45954,P49748,P24752,Q9BWD1,P49753,Q8N9L9,O14734,Q99424,O15254,P33121,Q9ULC5,Q9UKU0,Q3SY69,Q9UHK6,Q13825,Q14032,P50416,Q92523,Q8TCG5,P43155,Q13011,P30084,O75521,P07148,P49327,O15228,Q16836,P40939,P55084,Q9UJM8,Q9NYQ3,Q99714,P51659,P86397,Q86WA8,O95822,Q15800,Q9NWU1,O00628,O14832,Q07869,P22307,P36956,Q2T9J0
GO:BP	organic substance catabolic process	GO:1901575	false	9.14e-37	36.0391	2148	172	86	21128	P42765,P28330,P16219,P45954,P49748,P24752,Q9BWD1,Q8N9L9,O14734,Q99424,O15254,O00116,P21549,O75891,Q3SY69,P04075,P05062,P09972,Q9UHK6,Q01432,P48728,P05067,Q13825,P07738,P50416,Q92523,Q8TCG5,P43155,Q16850,Q13011,P30084,O75521,P68104,P06733,P09104,P13929,A6NNW6,P22413,P34913,P07148,P23434,P23378,P06744,Q16836,P40939,P55084,Q9UJM8,P35914,Q8TB92,P04035,P00492,Q99714,P51659,Q9BY32,P00338,Q86WA8,O95822,…
GO:BP	catabolic process	GO:0009056	false	9.91e-35	34.004	2609	172	91	21128	P42765,P28330,P16219,P45954,P49748,P24752,Q9BWD1,Q8N9L9,O14734,Q99424,O15254,P33121,O00116,P21549,O75891,Q3SY69,P04075,P05062,P09972,Q9UHK6,Q01432,P48728,P05067,Q13825,P07738,P04040,P50416,Q92523,Q8TCG5,P43155,Q16850,Q13011,P30084,O75521,P68104,P06733,P09104,P13929,A6NNW6,P22413,P34913,P07148,P23434,P23378,P06744,Q16836,P40939,P55084,Q9UJM8,P35914,Q8TB92,P04035,P00492,Q99714,P51659,P42858,Q9BY32,…
GO:BP	lipid modification	GO:0030258	false	3.55e-33	32.4495	204	172	35	21128	P42765,P28330,P16219,P49748,P24752,Q9BWD1,O14734,Q99424,O15254,Q3SY69,Q9UHK6,Q13825,P50416,Q92523,Q8TCG5,P43155,Q13011,P30084,O75521,P34913,P07148,Q16836,P40939,P55084,Q9UJM8,Q9NYQ3,Q99714,P51659,Q86WA8,O95822,O00628,O14832,Q07869,P22307,Q2T9J0
GO:BP	cellular lipid metabolic process	GO:0044255	false	1.67e-32	31.7777	1011	172	60	21128	Q86V21,P42765,P28330,P16219,P45954,P49748,P24752,Q9BWD1,P49753,Q8N9L9,O14734,Q99424,O15254,P33121,Q9ULC5,Q9UKU0,O00116,Q3SY69,Q9UHK6,Q13825,Q14032,P04040,P50416,Q92523,Q8TCG5,P43155,Q9BTZ2,Q13011,P30084,O75521,P34913,P07148,P49327,P37268,P14324,O15228,Q16836,P40939,P55084,Q9UJM8,Q9NYQ3,P04035,Q01581,Q99714,P51659,P86397,Q86WA8,P48449,O95822,Q15800,P53602,Q9NWU1,O00628,O14832,Q07869,P50897,P22307,…
GO:BP	cellular lipid catabolic process	GO:0044242	false	2.62e-30	29.5816	223	172	34	21128	P42765,P28330,P16219,P49748,P24752,Q9BWD1,O14734,Q99424,O15254,Q3SY69,Q9UHK6,Q13825,P50416,Q92523,Q8TCG5,P43155,Q13011,P30084,O75521,P07148,Q16836,P40939,P55084,Q9UJM8,Q99714,P51659,Q86WA8,O95822,O00628,O14832,Q07869,P50897,P22307,Q2T9J0
GO:BP	organonitrogen compound metabolic process	GO:1901564	false	1.92e-29	28.7177	6538	172	129	21128	P42765,P28330,P45954,P24752,P49753,Q8N9L9,O14734,P33121,Q9ULC5,Q9UKU0,P55263,P30566,A0A024R5Q7,Q8N142,O00116,P21549,O75891,Q3SY69,P04075,P05062,P09972,P23109,Q01433,Q01432,P48728,P05067,P07741,P31939,Q13825,Q14032,P07738,Q86X55,P04040,P50416,Q92523,Q8TCG5,P43155,Q92793,P17812,Q9NRF8,Q16850,Q15392,P00374,Q86XF0,P30084,P68104,P06733,P09104,P13929,A6NNW6,P22413,P07148,Q02790,Q13451,P11413,P22102,P23…
GO:BP	ribose phosphate biosynthetic process	GO:0046390	false	1.26e-28	27.8996	249	172	34	21128	P42765,P24752,P33121,Q9ULC5,Q9UKU0,P55263,P30566,A0A024R5Q7,Q8N142,O00116,P04075,P23109,Q01433,Q01432,P07741,P31939,P17812,Q9NRF8,P06733,P11413,P22102,P49915,P00492,P86397,P20839,P12268,O95822,P11586,P29803,P30613,Q07869,P50897,Q9UMR5,P29401
GO:BP	lipid catabolic process	GO:0016042	false	1.62e-27	26.7897	345	172	37	21128	P42765,P28330,P16219,P49748,P24752,Q9BWD1,O14734,Q99424,O15254,Q3SY69,Q9UHK6,Q13825,P50416,Q92523,Q8TCG5,P43155,Q13011,P30084,O75521,P07148,Q16836,P40939,P55084,Q9UJM8,Q99714,P51659,Q86WA8,O95822,P55809,Q9BYC2,O00628,O14832,Q07869,P50897,P22307,Q9BZK7,Q2T9J0
GO:BP	phosphate-containing compound metabolic process	GO:0006796	false	1.74e-27	26.7601	2843	172	86	21128	P42765,P24752,P49753,Q8N9L9,O14734,P33121,Q9ULC5,Q9UKU0,P55263,P30566,A0A024R5Q7,Q8N142,O00116,O75891,Q3SY69,P04075,P05062,P09972,P23109,Q01433,Q01432,P05067,P07741,P31939,Q14032,P07738,P17812,Q9NRF8,P68104,P06733,P09104,P13929,A6NNW6,P22413,P34913,P37268,P14324,P11413,P22102,P49915,O15228,P06744,Q9BZE4,Q16774,O95479,P40939,P04035,Q01581,P00492,P51659,P86397,P42858,P20839,P12268,Q9BY32,P00338,O95…
GO:BP	purine ribonucleoside monophosphate metabolic process	GO:0009167	false	2.58e-27	26.5878	45	172	20	21128	P42765,P55263,P30566,A0A024R5Q7,Q8N142,O00116,P23109,Q01433,Q01432,P07741,P31939,P22102,P49915,Q16774,P00492,P20839,P12268,Q9BXI3,P49902,P21589
GO:BP	phosphorus metabolic process	GO:0006793	false	3.32e-27	26.4785	2868	172	86	21128	P42765,P24752,P49753,Q8N9L9,O14734,P33121,Q9ULC5,Q9UKU0,P55263,P30566,A0A024R5Q7,Q8N142,O00116,O75891,Q3SY69,P04075,P05062,P09972,P23109,Q01433,Q01432,P05067,P07741,P31939,Q14032,P07738,P17812,Q9NRF8,P68104,P06733,P09104,P13929,A6NNW6,P22413,P34913,P37268,P14324,P11413,P22102,P49915,O15228,P06744,Q9BZE4,Q16774,O95479,P40939,P04035,Q01581,P00492,P51659,P86397,P42858,P20839,P12268,Q9BY32,P00338,O95…
GO:BP	purine nucleoside monophosphate metabolic process	GO:0009126	false	7.85e-27	26.1052	47	172	20	21128	P42765,P55263,P30566,A0A024R5Q7,Q8N142,O00116,P23109,Q01433,Q01432,P07741,P31939,P22102,P49915,Q16774,P00492,P20839,P12268,Q9BXI3,P49902,P21589
GO:BP	ribonucleotide biosynthetic process	GO:0009260	false	2.64e-26	25.5783	242	172	32	21128	P42765,P24752,P33121,Q9ULC5,Q9UKU0,P55263,P30566,A0A024R5Q7,Q8N142,O00116,P04075,P23109,Q01433,Q01432,P07741,P31939,P17812,Q9NRF8,P06733,P22102,P49915,P00492,P86397,P20839,P12268,O95822,P11586,P29803,P30613,Q07869,P50897,Q9UMR5
GO:BP	nucleotide biosynthetic process	GO:0009165	false	3.04e-26	25.5171	318	172	35	21128	P42765,P24752,P33121,Q9ULC5,Q9UKU0,P55263,P30566,A0A024R5Q7,Q8N142,O00116,P04075,P23109,Q01433,Q01432,P07741,P31939,P17812,Q9NRF8,P06733,P22102,P49915,Q16774,P00492,P86397,P20839,P12268,O95822,P11586,Q9H903,P29803,P30613,Q07869,P50897,Q9UMR5,P04818
GO:BP	nucleoside phosphate biosynthetic process	GO:1901293	false	4.22e-26	25.3745	321	172	35	21128	P42765,P24752,P33121,Q9ULC5,Q9UKU0,P55263,P30566,A0A024R5Q7,Q8N142,O00116,P04075,P23109,Q01433,Q01432,P07741,P31939,P17812,Q9NRF8,P06733,P22102,P49915,Q16774,P00492,P86397,P20839,P12268,O95822,P11586,Q9H903,P29803,P30613,Q07869,P50897,Q9UMR5,P04818
GO:BP	primary metabolic process	GO:0044238	false	6.22e-26	25.2062	12745	172	166	21128	Q86V21,P42765,P28330,P16219,P45954,P49748,P24752,Q9BWD1,P49753,Q8N9L9,O14734,Q99424,O15254,P33121,Q9ULC5,Q9UKU0,P55263,P30566,A0A024R5Q7,Q8N142,O00116,P21549,O75891,Q3SY69,P04075,P05062,P09972,Q9UHK6,P23109,Q01433,Q01432,P48728,P05067,P07741,P31939,Q13825,Q14032,P07738,Q6FII3,Q86X55,P04040,P50416,Q92523,Q8TCG5,P43155,Q92793,P17812,Q9NRF8,Q16850,Q15392,P00374,Q86XF0,Q9BTZ2,Q15125,Q13011,P30084,O75…
GO:BP	purine ribonucleoside monophosphate biosynthetic process	GO:0009168	false	7.88e-26	25.1035	23	172	16	21128	P42765,P55263,P30566,A0A024R5Q7,Q8N142,O00116,P23109,Q01433,Q01432,P07741,P31939,P22102,P49915,P00492,P20839,P12268
GO:BP	cellular catabolic process	GO:0044248	false	3.06e-25	24.5141	2138	172	73	21128	P42765,P28330,P16219,P45954,P49748,P24752,Q9BWD1,Q8N9L9,O14734,Q99424,O15254,P33121,P21549,O75891,Q3SY69,Q9UHK6,Q01432,P48728,P05067,Q13825,P04040,P50416,Q92523,Q8TCG5,P43155,Q13011,P30084,O75521,P68104,P22413,P34913,P07148,P23434,P23378,Q16836,P40939,P55084,Q9UJM8,P35914,Q8TB92,P00492,Q99714,P51659,P42858,Q9BY32,Q86WA8,O95822,Q99707,Q9BXI3,Q96P26,P49902,Q9H0P0,Q969T7,P21589,P55809,Q9BYC2,O00628,…
GO:BP	purine-containing compound biosynthetic process	GO:0072522	false	3.42e-25	24.4665	287	172	33	21128	P42765,P24752,P33121,Q9ULC5,Q9UKU0,P55263,P30566,A0A024R5Q7,Q8N142,O00116,P04075,P23109,Q01433,Q01432,P07741,P31939,P06733,P22102,P49915,Q16774,P00492,P86397,P20839,P12268,O95822,P11586,Q9H903,P21589,P29803,P30613,Q07869,P50897,Q9UMR5
GO:BP	steroid metabolic process	GO:0008202	false	6.26e-25	24.2037	319	172	34	21128	P42765,P28330,P49748,O14734,Q9UHK6,P05067,Q14032,Q6FII3,P04040,Q16850,Q15392,Q9BTZ2,Q15125,P34913,P37268,P14324,P11413,O95479,P04035,Q01581,Q99714,P51659,P56937,Q14739,P48449,Q15648,Q15800,P53602,Q15738,O75845,P22307,Q14534,P36956,Q12772
GO:BP	purine nucleoside monophosphate biosynthetic process	GO:0009127	false	6.48e-25	24.1888	25	172	16	21128	P42765,P55263,P30566,A0A024R5Q7,Q8N142,O00116,P23109,Q01433,Q01432,P07741,P31939,P22102,P49915,P00492,P20839,P12268
GO:BP	ribonucleoside monophosphate metabolic process	GO:0009161	false	6.6e-25	24.1806	67	172	21	21128	P42765,P55263,P30566,A0A024R5Q7,Q8N142,O00116,P23109,Q01433,Q01432,P07741,P31939,P22102,P49915,Q16774,P00492,P20839,P12268,Q9BXI3,P49902,Q9H0P0,P21589
GO:BP	purine ribonucleotide biosynthetic process	GO:0009152	false	1.2e-24	23.9224	224	172	30	21128	P42765,P24752,P33121,Q9ULC5,Q9UKU0,P55263,P30566,A0A024R5Q7,Q8N142,O00116,P04075,P23109,Q01433,Q01432,P07741,P31939,P06733,P22102,P49915,P00492,P86397,P20839,P12268,O95822,P11586,P29803,P30613,Q07869,P50897,Q9UMR5
GO:BP	organophosphate biosynthetic process	GO:0090407	false	1.53e-24	23.8141	624	172	43	21128	P42765,P24752,P33121,Q9ULC5,Q9UKU0,P55263,P30566,A0A024R5Q7,Q8N142,O00116,P04075,P23109,Q01433,Q01432,P07741,P31939,P17812,Q9NRF8,P06733,P14324,P11413,P22102,P49915,O15228,Q16774,Q01581,P00492,P86397,P20839,P12268,O95822,P11586,Q9H903,P53602,P29803,P30613,Q07869,P50897,Q9UMR5,P22307,P29401,P60174,P04818
GO:BP	purine nucleotide biosynthetic process	GO:0006164	false	2.36e-24	23.6272	278	172	32	21128	P42765,P24752,P33121,Q9ULC5,Q9UKU0,P55263,P30566,A0A024R5Q7,Q8N142,O00116,P04075,P23109,Q01433,Q01432,P07741,P31939,P06733,P22102,P49915,Q16774,P00492,P86397,P20839,P12268,O95822,P11586,Q9H903,P29803,P30613,Q07869,P50897,Q9UMR5
GO:BP	generation of precursor metabolites and energy	GO:0006091	false	3.16e-24	23.5009	525	172	40	21128	Q86V21,P49748,P24752,P30566,O00116,O75891,Q3SY69,P04075,P05062,P09972,P05067,P07738,P04040,P06733,P09104,P13929,A6NNW6,P22413,P11413,P23378,P06744,O95479,P55084,P35914,Q8TB92,P00338,Q99707,P55809,Q9BYC2,P29803,P18669,P15259,Q8N0Y7,P52209,P30613,P14618,Q07869,P37837,P29401,P60174
GO:BP	nucleoside monophosphate metabolic process	GO:0009123	false	5.47e-24	23.2618	86	172	22	21128	P42765,P55263,P30566,A0A024R5Q7,Q8N142,O00116,P23109,Q01433,Q01432,P07741,P31939,P22102,P49915,Q16774,P00492,P20839,P12268,Q9BXI3,P49902,Q9H0P0,P21589,P04818
GO:BP	lipid biosynthetic process	GO:0008610	false	5.68e-24	23.2454	724	172	45	21128	Q86V21,P42765,P28330,P49748,Q8N9L9,O14734,P33121,Q9ULC5,Q9UKU0,O00116,Q9UHK6,Q14032,Q6FII3,Q16850,Q15392,Q15125,P49327,P37268,P14324,P11413,O15228,O95479,P35914,Q8TB92,P04035,Q01581,Q99714,P56937,P86397,Q14739,P48449,Q15648,O95822,Q15800,P53602,Q15738,Q9NWU1,O00628,Q07869,P50897,Q9UMR5,O75845,P22307,Q14534,P36956
GO:BP	sterol biosynthetic process	GO:0016126	false	2.06e-22	21.6867	60	172	19	21128	P42765,Q6FII3,Q16850,Q15392,Q15125,P37268,P14324,P11413,P04035,Q01581,P56937,Q14739,P48449,Q15800,P53602,Q15738,O75845,Q14534,P36956
GO:BP	IMP metabolic process	GO:0046040	false	2.25e-22	21.6471	20	172	14	21128	P42765,P30566,A0A024R5Q7,Q8N142,O00116,P23109,Q01433,Q01432,P07741,P31939,P22102,P00492,Q9BXI3,P49902
GO:BP	steroid biosynthetic process	GO:0006694	false	2.42e-22	21.6163	173	172	26	21128	P42765,O14734,Q9UHK6,Q14032,Q6FII3,Q16850,Q15392,Q15125,P37268,P14324,P11413,O95479,P04035,Q01581,Q99714,P56937,Q14739,P48449,Q15648,Q15800,P53602,Q15738,O75845,P22307,Q14534,P36956
GO:BP	sterol metabolic process	GO:0016125	false	2.49e-22	21.6046	153	172	25	21128	P42765,P28330,P49748,P05067,Q6FII3,P04040,Q16850,Q15392,Q15125,P34913,P37268,P14324,P11413,P04035,Q01581,P56937,Q14739,P48449,Q15800,P53602,Q15738,O75845,Q14534,P36956,Q12772
GO:BP	organic substance metabolic process	GO:0071704	false	2.95e-22	21.53	13937	172	168	21128	Q86V21,P42765,P28330,P16219,P45954,P49748,P24752,Q9BWD1,P49753,Q8N9L9,O14734,Q99424,O15254,P33121,Q9ULC5,Q9UKU0,P55263,P30566,A0A024R5Q7,Q8N142,O00116,P21549,O75891,Q3SY69,P04075,P05062,P09972,Q9UHK6,P23109,Q01433,Q01432,P48728,P05067,P07741,P31939,Q13825,Q14032,P07738,Q6FII3,Q86X55,P04040,P50416,Q92523,Q8TCG5,P43155,Q92793,P17812,Q9NRF8,Q16850,Q15392,P00374,Q86XF0,Q9BTZ2,Q15125,Q13011,P30084,O75…
GO:BP	cholesterol metabolic process	GO:0008203	false	4.22e-22	21.3749	137	172	24	21128	P42765,P28330,P49748,P05067,P04040,Q16850,Q15392,Q15125,P34913,P37268,P14324,P11413,P04035,Q01581,P56937,Q14739,P48449,Q15800,P53602,Q15738,O75845,Q14534,P36956,Q12772
GO:BP	organic hydroxy compound metabolic process	GO:1901615	false	4.67e-22	21.3309	561	172	39	21128	P42765,P28330,P49748,O14734,Q9UHK6,P05067,Q14032,Q6FII3,P04040,Q16850,Q15392,P00374,Q9BTZ2,Q15125,P34913,P37268,P14324,P11413,O95479,Q9UJM8,P04035,Q01581,P00492,Q99714,P56937,Q14739,P00338,P48449,Q15648,Q15800,P53602,Q15738,O75845,P22307,Q14534,P36956,Q12772,P51854,P60174
GO:BP	secondary alcohol metabolic process	GO:1902652	false	2.49e-21	20.603	147	172	24	21128	P42765,P28330,P49748,P05067,P04040,Q16850,Q15392,Q15125,P34913,P37268,P14324,P11413,P04035,Q01581,P56937,Q14739,P48449,Q15800,P53602,Q15738,O75845,Q14534,P36956,Q12772
GO:BP	carbohydrate derivative biosynthetic process	GO:1901137	false	4.28e-21	20.3683	676	172	41	21128	P42765,P24752,O14734,P33121,Q9ULC5,Q9UKU0,P55263,P30566,A0A024R5Q7,Q8N142,O00116,P04075,P23109,Q01433,Q01432,P07741,P31939,P17812,Q9NRF8,Q86XF0,P06733,P11413,P22102,P49915,O15228,Q16774,P00492,P86397,P20839,P12268,O95822,P11586,P21589,P29803,P30613,Q07869,P50897,Q9UMR5,P29401,P60174,P04818
GO:BP	alpha-amino acid metabolic process	GO:1901605	false	5.57e-21	20.2543	218	172	27	21128	P45954,P24752,A0A024R5Q7,P21549,P48728,Q13825,Q14032,P17812,Q9NRF8,P00374,Q86XF0,P22102,P23434,P23378,P49915,O15228,Q9UJM8,P35914,Q8TB92,Q99714,P11586,Q9H903,P42898,Q99707,Q9P0Z9,P78330,Q9UL12
GO:BP	nucleoside monophosphate biosynthetic process	GO:0009124	false	2.91e-20	19.5365	51	172	17	21128	P42765,P55263,P30566,A0A024R5Q7,Q8N142,O00116,P23109,Q01433,Q01432,P07741,P31939,P22102,P49915,P00492,P20839,P12268,P04818
GO:BP	ribonucleoside monophosphate biosynthetic process	GO:0009156	false	2.92e-20	19.5344	41	172	16	21128	P42765,P55263,P30566,A0A024R5Q7,Q8N142,O00116,P23109,Q01433,Q01432,P07741,P31939,P22102,P49915,P00492,P20839,P12268
GO:BP	secondary alcohol biosynthetic process	GO:1902653	false	6.27e-20	19.2027	53	172	17	21128	P42765,Q16850,Q15392,Q15125,P37268,P14324,P11413,P04035,Q01581,P56937,Q14739,P48449,Q15800,P53602,Q15738,O75845,P36956
GO:BP	cholesterol biosynthetic process	GO:0006695	false	6.27e-20	19.2027	53	172	17	21128	P42765,Q16850,Q15392,Q15125,P37268,P14324,P11413,P04035,Q01581,P56937,Q14739,P48449,Q15800,P53602,Q15738,O75845,P36956
GO:BP	metabolic process	GO:0008152	false	6.88e-20	19.1627	14417	172	168	21128	Q86V21,P42765,P28330,P16219,P45954,P49748,P24752,Q9BWD1,P49753,Q8N9L9,O14734,Q99424,O15254,P33121,Q9ULC5,Q9UKU0,P55263,P30566,A0A024R5Q7,Q8N142,O00116,P21549,O75891,Q3SY69,P04075,P05062,P09972,Q9UHK6,P23109,Q01433,Q01432,P48728,P05067,P07741,P31939,Q13825,Q14032,P07738,Q6FII3,Q86X55,P04040,P50416,Q92523,Q8TCG5,P43155,Q92793,P17812,Q9NRF8,Q16850,Q15392,P00374,Q86XF0,Q9BTZ2,Q15125,Q13011,P30084,O75…
GO:BP	cellular metabolic process	GO:0044237	false	7.76e-20	19.11	12122	172	157	21128	Q86V21,P42765,P28330,P16219,P45954,P49748,P24752,Q9BWD1,P49753,Q8N9L9,O14734,Q99424,O15254,P33121,Q9ULC5,Q9UKU0,P55263,P30566,A0A024R5Q7,Q8N142,O00116,P21549,O75891,Q3SY69,P04075,P05062,P09972,Q9UHK6,P23109,Q01433,Q01432,P48728,P05067,P07741,P31939,Q13825,Q14032,P07738,Q86X55,P04040,P50416,Q92523,Q8TCG5,P43155,Q92793,P17812,Q9NRF8,P00374,Q86XF0,Q9BTZ2,Q13011,P30084,O75521,P68104,P06733,P09104,P13…
GO:BP	purine nucleoside diphosphate metabolic process	GO:0009135	false	8.73e-20	19.0589	111	172	21	21128	O00116,P04075,P05062,P09972,P05067,P07738,P06733,P09104,P13929,A6NNW6,P06744,Q16774,P00338,P21589,P18669,P15259,Q8N0Y7,P30613,P14618,Q07869,P60174
GO:BP	purine ribonucleoside diphosphate metabolic process	GO:0009179	false	8.73e-20	19.0589	111	172	21	21128	O00116,P04075,P05062,P09972,P05067,P07738,P06733,P09104,P13929,A6NNW6,P06744,Q16774,P00338,P21589,P18669,P15259,Q8N0Y7,P30613,P14618,Q07869,P60174
GO:BP	nucleoside triphosphate metabolic process	GO:0009141	false	1.46e-19	18.8365	273	172	28	21128	P55263,O00116,P04075,P05062,P09972,P05067,P07738,P17812,Q9NRF8,P06733,P09104,P13929,A6NNW6,P22413,P06744,P20839,P12268,Q9BY32,P00338,P21589,P18669,P15259,Q8N0Y7,P30613,P14618,Q07869,P60174,P04818
GO:BP	tetrahydrofolate metabolic process	GO:0046653	false	1.55e-19	18.8098	21	172	13	21128	O00116,O75891,Q3SY69,P31939,P00374,Q86XF0,P22102,P11586,Q6UB35,P13995,Q9H903,P42898,P04818
GO:BP	alcohol metabolic process	GO:0006066	false	1.96e-19	18.7086	366	172	31	21128	P42765,P28330,P49748,P05067,P04040,Q16850,Q15392,P00374,Q9BTZ2,Q15125,P34913,P37268,P14324,P11413,O95479,Q9UJM8,P04035,Q01581,P56937,Q14739,P48449,Q15800,P53602,Q15738,O75845,P22307,Q14534,P36956,Q12772,P51854,P60174
GO:BP	ADP metabolic process	GO:0046031	false	2.41e-19	18.6182	99	172	20	21128	O00116,P04075,P05062,P09972,P05067,P07738,P06733,P09104,P13929,A6NNW6,P06744,P00338,P21589,P18669,P15259,Q8N0Y7,P30613,P14618,Q07869,P60174
GO:BP	biosynthetic process	GO:0009058	false	3.26e-19	18.4862	5973	172	110	21128	Q86V21,P42765,P28330,P49748,P24752,Q8N9L9,O14734,P33121,Q9ULC5,Q9UKU0,P55263,P30566,A0A024R5Q7,Q8N142,O00116,P21549,O75891,Q3SY69,P04075,P09972,Q9UHK6,P23109,Q01433,Q01432,P05067,P07741,P31939,Q14032,Q6FII3,Q86X55,P04040,Q92793,P17812,Q9NRF8,Q16850,Q15392,P00374,Q86XF0,Q15125,P68104,P06733,P09104,P22413,P49327,P37268,P14324,P11413,P22102,P49915,O15228,P06744,Q16774,O95479,Q9UJM8,P35914,Q8TB92,P04…
GO:BP	ribonucleoside diphosphate metabolic process	GO:0009185	false	5.96e-19	18.2249	121	172	21	21128	O00116,P04075,P05062,P09972,P05067,P07738,P06733,P09104,P13929,A6NNW6,P06744,Q16774,P00338,P21589,P18669,P15259,Q8N0Y7,P30613,P14618,Q07869,P60174
GO:BP	pteridine-containing compound metabolic process	GO:0042558	false	5.98e-19	18.2235	38	172	15	21128	P24752,O00116,O75891,Q3SY69,P31939,P00374,Q86XF0,P22102,P11586,Q6UB35,P13995,Q9H903,P42898,Q99707,P04818
GO:BP	organic hydroxy compound biosynthetic process	GO:1901617	false	1.09e-18	17.9607	238	172	26	21128	P42765,O14734,Q9UHK6,Q14032,Q6FII3,Q16850,Q15392,P00374,Q15125,P37268,P14324,P11413,O95479,P04035,Q01581,Q99714,P56937,Q14739,P48449,Q15800,P53602,Q15738,O75845,P22307,Q14534,P36956
GO:BP	glycolytic process	GO:0006096	false	1.17e-18	17.9304	90	172	19	21128	O00116,P04075,P05062,P09972,P05067,P07738,P06733,P09104,P13929,A6NNW6,P06744,P00338,P18669,P15259,Q8N0Y7,P30613,P14618,Q07869,P60174
GO:BP	nucleoside bisphosphate metabolic process	GO:0033865	false	1.46e-18	17.8368	126	172	21	21128	P24752,P49753,Q8N9L9,O14734,P33121,Q9ULC5,Q9UKU0,Q14032,P22413,P04035,Q01581,P51659,P86397,O95822,Q99707,P53602,Q9NWU1,P29803,Q9P0Z9,P50897,Q9UMR5
GO:BP	purine nucleoside bisphosphate metabolic process	GO:0034032	false	1.46e-18	17.8368	126	172	21	21128	P24752,P49753,Q8N9L9,O14734,P33121,Q9ULC5,Q9UKU0,Q14032,P22413,P04035,Q01581,P51659,P86397,O95822,Q99707,P53602,Q9NWU1,P29803,Q9P0Z9,P50897,Q9UMR5
GO:BP	ribonucleoside bisphosphate metabolic process	GO:0033875	false	1.46e-18	17.8368	126	172	21	21128	P24752,P49753,Q8N9L9,O14734,P33121,Q9ULC5,Q9UKU0,Q14032,P22413,P04035,Q01581,P51659,P86397,O95822,Q99707,P53602,Q9NWU1,P29803,Q9P0Z9,P50897,Q9UMR5
GO:BP	ATP generation from ADP	GO:0006757	false	1.47e-18	17.8317	91	172	19	21128	O00116,P04075,P05062,P09972,P05067,P07738,P06733,P09104,P13929,A6NNW6,P06744,P00338,P18669,P15259,Q8N0Y7,P30613,P14618,Q07869,P60174
GO:BP	nucleotide phosphorylation	GO:0046939	false	1.88e-18	17.7247	109	172	20	21128	O00116,P04075,P05062,P09972,P05067,P07738,P06733,P09104,P13929,A6NNW6,P06744,P00338,P49902,P18669,P15259,Q8N0Y7,P30613,P14618,Q07869,P60174
GO:BP	organic substance biosynthetic process	GO:1901576	false	1.89e-18	17.7233	5886	172	108	21128	Q86V21,P42765,P28330,P49748,P24752,Q8N9L9,O14734,P33121,Q9ULC5,Q9UKU0,P55263,P30566,A0A024R5Q7,Q8N142,O00116,P21549,P04075,P09972,Q9UHK6,P23109,Q01433,Q01432,P05067,P07741,P31939,Q14032,Q6FII3,Q86X55,P04040,Q92793,P17812,Q9NRF8,Q16850,Q15392,P00374,Q86XF0,Q15125,P68104,P06733,P09104,P22413,P49327,P37268,P14324,P11413,P22102,P49915,O15228,P06744,Q16774,O95479,Q9UJM8,P35914,Q8TB92,P04035,Q01581,P00…
GO:BP	acyl-CoA metabolic process	GO:0006637	false	3.56e-18	17.449	95	172	19	21128	P24752,P49753,Q8N9L9,O14734,P33121,Q9ULC5,Q9UKU0,Q14032,Q01581,P51659,P86397,O95822,Q99707,P53602,Q9NWU1,P29803,Q9P0Z9,P50897,Q9UMR5
GO:BP	thioester metabolic process	GO:0035383	false	3.56e-18	17.449	95	172	19	21128	P24752,P49753,Q8N9L9,O14734,P33121,Q9ULC5,Q9UKU0,Q14032,Q01581,P51659,P86397,O95822,Q99707,P53602,Q9NWU1,P29803,Q9P0Z9,P50897,Q9UMR5
GO:BP	AMP metabolic process	GO:0046033	false	3.85e-18	17.4145	25	172	13	21128	P55263,P30566,A0A024R5Q7,Q8N142,P23109,Q01433,Q01432,P07741,P31939,P22102,P00492,Q9BXI3,P21589
GO:BP	amino acid metabolic process	GO:0006520	false	4.37e-18	17.3598	309	172	28	21128	P45954,P24752,A0A024R5Q7,P21549,P48728,Q13825,Q14032,P17812,Q9NRF8,P00374,Q86XF0,P30084,P22102,P23434,P23378,P49915,O15228,Q9UJM8,P35914,Q8TB92,Q99714,P11586,Q9H903,P42898,Q99707,Q9P0Z9,P78330,Q9UL12
GO:BP	pyruvate metabolic process	GO:0006090	false	5.86e-18	17.2325	115	172	20	21128	O00116,P04075,P05062,P09972,P05067,P07738,P06733,P09104,P13929,A6NNW6,P06744,P00338,P29803,P18669,P15259,Q8N0Y7,P30613,P14618,Q07869,P60174
GO:BP	ribonucleoside triphosphate metabolic process	GO:0009199	false	7.16e-18	17.1453	256	172	26	21128	O00116,P04075,P05062,P09972,P05067,P07738,P17812,Q9NRF8,P06733,P09104,P13929,A6NNW6,P22413,P06744,P20839,P12268,Q9BY32,P00338,P21589,P18669,P15259,Q8N0Y7,P30613,P14618,Q07869,P60174
GO:BP	nucleoside diphosphate metabolic process	GO:0009132	false	1.46e-17	16.8369	140	172	21	21128	O00116,P04075,P05062,P09972,P05067,P07738,P06733,P09104,P13929,A6NNW6,P06744,Q16774,P00338,P21589,P18669,P15259,Q8N0Y7,P30613,P14618,Q07869,P60174
GO:BP	nucleoside diphosphate phosphorylation	GO:0006165	false	3.95e-17	16.4034	107	172	19	21128	O00116,P04075,P05062,P09972,P05067,P07738,P06733,P09104,P13929,A6NNW6,P06744,P00338,P18669,P15259,Q8N0Y7,P30613,P14618,Q07869,P60174
GO:BP	folic acid-containing compound metabolic process	GO:0006760	false	8.56e-17	16.0675	30	172	13	21128	O00116,O75891,Q3SY69,P31939,P00374,Q86XF0,P22102,P11586,Q6UB35,P13995,Q9H903,P42898,P04818
GO:BP	purine nucleoside triphosphate metabolic process	GO:0009144	false	9.4e-17	16.0269	254	172	25	21128	P55263,O00116,P04075,P05062,P09972,P05067,P07738,P06733,P09104,P13929,A6NNW6,P22413,P06744,P20839,P12268,Q9BY32,P00338,P21589,P18669,P15259,Q8N0Y7,P30613,P14618,Q07869,P60174
GO:BP	alcohol biosynthetic process	GO:0046165	false	2.24e-16	15.6492	137	172	20	21128	P42765,Q16850,Q15392,P00374,Q15125,P37268,P14324,P11413,O95479,P04035,Q01581,P56937,Q14739,P48449,Q15800,P53602,Q15738,O75845,P22307,P36956
GO:BP	carbohydrate catabolic process	GO:0016052	false	4.36e-16	15.3606	164	172	21	21128	O00116,P04075,P05062,P09972,P05067,P07738,P06733,P09104,P13929,A6NNW6,P06744,P00338,P18669,P15259,Q8N0Y7,P52209,P30613,P14618,Q07869,P51854,P60174
GO:BP	IMP biosynthetic process	GO:0006188	false	5.09e-16	15.2933	13	172	10	21128	P42765,P30566,O00116,P23109,Q01433,Q01432,P07741,P31939,P22102,P00492
GO:BP	purine ribonucleoside triphosphate metabolic process	GO:0009205	false	9.01e-16	15.0455	249	172	24	21128	O00116,P04075,P05062,P09972,P05067,P07738,P06733,P09104,P13929,A6NNW6,P22413,P06744,P20839,P12268,Q9BY32,P00338,P21589,P18669,P15259,Q8N0Y7,P30613,P14618,Q07869,P60174
GO:BP	cellular modified amino acid metabolic process	GO:0006575	false	2.78e-15	14.5566	179	172	21	21128	P28330,O00116,O75891,Q3SY69,P31939,P50416,Q92523,Q8TCG5,P43155,P00374,Q86XF0,P11413,P22102,Q15648,P11586,Q6UB35,P13995,Q9H903,P42898,Q9UL12,P04818
GO:BP	GMP metabolic process	GO:0046037	false	2.89e-15	14.5391	28	172	12	21128	P55263,P30566,P23109,P07741,P31939,P22102,P49915,Q16774,P00492,P20839,P12268,P49902
GO:BP	GMP biosynthetic process	GO:0006177	false	5.27e-15	14.2782	15	172	10	21128	P55263,P30566,P23109,P07741,P31939,P22102,P49915,P00492,P20839,P12268
GO:BP	sulfur compound metabolic process	GO:0006790	false	4.24e-14	13.3727	362	172	26	21128	P24752,P49753,Q8N9L9,O14734,P33121,Q9ULC5,Q9UKU0,P21549,Q14032,P22413,P11413,Q01581,P51659,P86397,O95822,P11586,Q9H903,P42898,Q99707,P53602,Q9NWU1,P29803,Q9P0Z9,P50897,Q9UMR5,P51854
GO:BP	carboxylic acid biosynthetic process	GO:0046394	false	4.84e-14	13.3147	329	172	25	21128	P28330,P49748,P24752,Q8N9L9,O14734,P21549,Q9UHK6,Q14032,P00374,Q86XF0,P49327,O15228,Q9UJM8,Q99714,P86397,O95822,P11586,Q6UB35,Q9H903,P42898,Q99707,Q9NWU1,P30613,P78330,P22307
GO:BP	organic acid biosynthetic process	GO:0016053	false	5.59e-14	13.2523	331	172	25	21128	P28330,P49748,P24752,Q8N9L9,O14734,P21549,Q9UHK6,Q14032,P00374,Q86XF0,P49327,O15228,Q9UJM8,Q99714,P86397,O95822,P11586,Q6UB35,Q9H903,P42898,Q99707,Q9NWU1,P30613,P78330,P22307
GO:BP	organic cyclic compound metabolic process	GO:1901360	false	9.07e-14	13.0425	8584	172	124	21128	P42765,P28330,P49748,P24752,P49753,Q8N9L9,O14734,P33121,Q9ULC5,Q9UKU0,P55263,P30566,A0A024R5Q7,Q8N142,O00116,O75891,Q3SY69,P04075,P05062,P09972,Q9UHK6,P23109,Q01433,Q01432,P05067,P07741,P31939,Q14032,P07738,Q6FII3,Q86X55,P04040,Q92793,P17812,Q9NRF8,Q16850,Q15392,P00374,Q86XF0,Q9BTZ2,Q15125,P06733,P09104,P13929,A6NNW6,P22413,P34913,P37268,P14324,P11413,P22102,P49915,O15228,P06744,Q9BZE4,Q16774,O95…
GO:BP	ATP metabolic process	GO:0046034	false	2.91e-13	12.536	224	172	21	21128	O00116,P04075,P05062,P09972,P05067,P07738,P06733,P09104,P13929,A6NNW6,P22413,P06744,P00338,P21589,P18669,P15259,Q8N0Y7,P30613,P14618,Q07869,P60174
GO:BP	organonitrogen compound biosynthetic process	GO:1901566	false	3.76e-13	12.4251	1805	172	52	21128	P42765,P24752,O14734,P33121,Q9ULC5,Q9UKU0,P55263,P30566,A0A024R5Q7,Q8N142,O00116,P21549,P04075,P23109,Q01433,Q01432,P05067,P07741,P31939,P17812,Q9NRF8,P00374,Q86XF0,P68104,P06733,P22102,P49915,O15228,Q16774,Q9UJM8,P00492,P86397,P20839,P12268,O95822,P11586,Q6UB35,Q9H903,P42898,Q99707,Q969T7,P21589,P29803,P30613,P14618,Q07869,P50897,Q9UMR5,P78330,P40429,O60506,P04818
GO:BP	serine family amino acid metabolic process	GO:0009069	false	1.31e-12	11.8822	43	172	12	21128	P24752,P21549,P48728,Q14032,P00374,Q86XF0,P22102,P23434,P23378,Q9UJM8,P11586,P78330
GO:BP	organic cyclic compound biosynthetic process	GO:1901362	false	1.59e-12	11.7986	4307	172	82	21128	P42765,P24752,O14734,P33121,Q9ULC5,Q9UKU0,P55263,P30566,A0A024R5Q7,Q8N142,O00116,P04075,Q9UHK6,P23109,Q01433,Q01432,P05067,P07741,P31939,Q14032,Q6FII3,Q86X55,P04040,Q92793,P17812,Q9NRF8,Q16850,Q15392,P00374,Q86XF0,Q15125,P06733,P22413,P37268,P14324,P11413,P22102,P49915,O15228,Q16774,O95479,P04035,Q01581,P00492,Q99714,P56937,P86397,P20839,P12268,Q14739,P48449,Q15648,O95822,Q15800,P11586,Q6UB35,Q9H…
GO:BP	dicarboxylic acid metabolic process	GO:0043648	false	8.61e-12	11.065	102	172	15	21128	P24752,Q8N9L9,O14734,A0A024R5Q7,O75891,Q3SY69,P31939,P00374,Q86XF0,P11586,Q6UB35,P13995,Q9H903,Q99707,O14832
GO:BP	glycine metabolic process	GO:0006544	false	2.03e-11	10.6928	19	172	9	21128	P21549,P48728,Q14032,P00374,Q86XF0,P22102,P23434,P23378,Q9UJM8
GO:BP	purine ribonucleotide salvage	GO:0106380	false	3.08e-11	10.5109	8	172	7	21128	P55263,P30566,P23109,Q01433,Q01432,P07741,P00492
GO:BP	AMP biosynthetic process	GO:0006167	false	8.74e-11	10.0587	14	172	8	21128	P55263,P30566,A0A024R5Q7,Q8N142,P07741,P31939,P22102,P00492
GO:BP	fatty acid derivative metabolic process	GO:1901568	false	9.44e-11	10.0248	77	172	13	21128	Q86V21,P24752,P33121,Q9ULC5,Q9UKU0,P35914,Q8TB92,P51659,P86397,P55809,Q9BYC2,P50897,Q9UMR5
GO:BP	tetrahydrofolate biosynthetic process	GO:0046654	false	1.38e-10	9.86063	9	172	7	21128	O00116,P31939,P00374,Q86XF0,P22102,P11586,Q6UB35
GO:BP	carbohydrate metabolic process	GO:0005975	false	1.41e-10	9.85166	601	172	28	21128	O00116,P04075,P05062,P09972,P05067,P07738,P50416,P06733,P09104,P13929,A6NNW6,P22413,P11413,P06744,O95479,P00338,O95822,P29803,P18669,P15259,Q8N0Y7,P52209,P30613,P14618,Q07869,P37837,P51854,P60174
GO:BP	monosaccharide metabolic process	GO:0005996	false	3.72e-10	9.42982	249	172	19	21128	O00116,P04075,P05062,P09972,P50416,P06733,P09104,P13929,P11413,P06744,O95479,O95822,P29803,P15259,P52209,P14618,Q07869,P51854,P60174
GO:BP	pteridine-containing compound biosynthetic process	GO:0042559	false	6.93e-10	9.15949	17	172	8	21128	P24752,O00116,P31939,P00374,Q86XF0,P22102,P11586,Q6UB35
GO:BP	hexose metabolic process	GO:0019318	false	1.07e-09	8.96927	230	172	18	21128	O00116,P04075,P05062,P09972,P50416,P06733,P09104,P13929,P11413,P06744,O95479,O95822,P29803,P15259,P14618,Q07869,P51854,P60174
GO:BP	amino acid catabolic process	GO:0009063	false	1.2e-09	8.92057	116	172	14	21128	P45954,P24752,P21549,P48728,Q13825,P30084,P23434,P23378,P35914,Q8TB92,Q99714,Q99707,Q9P0Z9,Q9UL12
GO:BP	folic acid-containing compound biosynthetic process	GO:0009396	false	1.25e-09	8.90438	11	172	7	21128	O00116,P31939,P00374,Q86XF0,P22102,P11586,Q6UB35
GO:BP	purine nucleotide salvage	GO:0032261	false	1.25e-09	8.90438	11	172	7	21128	P55263,P30566,P23109,Q01433,Q01432,P07741,P00492
GO:BP	one-carbon metabolic process	GO:0006730	false	1.25e-09	8.90348	40	172	10	21128	O75891,Q3SY69,P00374,Q86XF0,P11586,Q6UB35,P13995,Q9H903,P42898,P04818
GO:BP	alpha-amino acid catabolic process	GO:1901606	false	1.82e-09	8.741	96	172	13	21128	P45954,P24752,P21549,P48728,Q13825,P23434,P23378,P35914,Q8TB92,Q99714,Q99707,Q9P0Z9,Q9UL12
GO:BP	cellular biosynthetic process	GO:0044249	false	2.32e-09	8.63472	5793	172	91	21128	Q86V21,P42765,P28330,P49748,P24752,Q8N9L9,O14734,P33121,Q9ULC5,Q9UKU0,P55263,P30566,A0A024R5Q7,Q8N142,O00116,P21549,P04075,Q9UHK6,P23109,Q01433,Q01432,P05067,P07741,P31939,Q14032,Q86X55,P04040,Q92793,P17812,Q9NRF8,P00374,Q86XF0,P68104,P06733,P22413,P49327,P14324,P22102,P49915,O15228,Q16774,O95479,Q9UJM8,P35914,Q8TB92,P04035,Q01581,P00492,Q99714,P86397,P20839,P12268,P48449,Q15648,O95822,P11586,Q6U…
GO:BP	glucose metabolic process	GO:0006006	false	5.64e-09	8.24875	187	172	16	21128	O00116,P09972,P50416,P06733,P09104,P13929,P11413,P06744,O95479,O95822,P29803,P15259,P14618,Q07869,P51854,P60174
GO:BP	NADPH regeneration	GO:0006740	false	1.34e-08	7.87284	23	172	8	21128	O75891,Q3SY69,P11413,O95479,P18669,P52209,P37837,P29401
GO:BP	purine-containing compound salvage	GO:0043101	false	2.36e-08	7.62625	15	172	7	21128	P55263,P30566,P23109,Q01433,Q01432,P07741,P00492
GO:BP	cellular ketone body metabolic process	GO:0046950	false	4.07e-08	7.39088	9	172	6	21128	Q86V21,P24752,P35914,Q8TB92,P55809,Q9BYC2
GO:BP	nucleoside metabolic process	GO:0009116	false	4.69e-08	7.32876	56	172	10	21128	P55263,P07741,P31939,Q86XF0,P00492,Q9BXI3,Q96P26,P49902,Q9H0P0,P21589
GO:BP	IMP salvage	GO:0032264	false	6.25e-08	7.20431	5	172	5	21128	P23109,Q01433,Q01432,P07741,P00492
GO:BP	amide metabolic process	GO:0043603	false	6.85e-08	7.1643	1204	172	35	21128	P24752,P49753,Q8N9L9,O14734,P33121,Q9ULC5,Q9UKU0,Q3SY69,P05067,Q14032,P00374,Q86XF0,P68104,P11413,Q01581,P51659,P86397,O95822,P13995,Q9H903,Q99707,P53602,Q9BXI3,P49902,Q969T7,Q9NWU1,P29803,P18669,Q9P0Z9,P14618,P50897,Q9UMR5,P40429,O60506,P04818
GO:BP	ketone body metabolic process	GO:1902224	false	1.01e-07	6.99587	10	172	6	21128	Q86V21,P24752,P35914,Q8TB92,P55809,Q9BYC2
GO:BP	nucleotide salvage	GO:0043173	false	1.15e-07	6.94098	18	172	7	21128	P55263,P30566,P23109,Q01433,Q01432,P07741,P00492
GO:BP	alpha-amino acid biosynthetic process	GO:1901607	false	1.36e-07	6.86698	83	172	11	21128	P24752,P21549,P00374,Q86XF0,O15228,Q9UJM8,P11586,Q9H903,P42898,Q99707,P78330
GO:BP	thioester biosynthetic process	GO:0035384	false	2e-07	6.69794	46	172	9	21128	P24752,P33121,Q9ULC5,Q9UKU0,P86397,O95822,P29803,P50897,Q9UMR5
GO:BP	acyl-CoA biosynthetic process	GO:0071616	false	2e-07	6.69794	46	172	9	21128	P24752,P33121,Q9ULC5,Q9UKU0,P86397,O95822,P29803,P50897,Q9UMR5
GO:BP	tetrahydrofolate interconversion	GO:0035999	false	2.21e-07	6.65638	11	172	6	21128	P11586,Q6UB35,P13995,Q9H903,P42898,P04818
GO:BP	nucleoside phosphate catabolic process	GO:1901292	false	2.29e-07	6.63987	87	172	11	21128	P24752,Q01432,P22413,P00492,Q9BY32,O95822,Q9BXI3,Q96P26,P49902,Q9H0P0,P21589
GO:BP	serine family amino acid biosynthetic process	GO:0009070	false	2.75e-07	6.56027	20	172	7	21128	P24752,P21549,P00374,Q86XF0,Q9UJM8,P11586,P78330
GO:BP	fatty acid derivative biosynthetic process	GO:1901570	false	3.66e-07	6.43638	49	172	9	21128	Q86V21,P33121,Q9ULC5,Q9UKU0,P35914,Q8TB92,P86397,P50897,Q9UMR5
GO:BP	10-formyltetrahydrofolate metabolic process	GO:0009256	false	3.72e-07	6.42903	6	172	5	21128	O75891,Q3SY69,P11586,Q6UB35,Q9H903
GO:BP	fatty acid beta-oxidation using acyl-CoA oxidase	GO:0033540	false	4.38e-07	6.35829	12	172	6	21128	O14734,Q99424,O15254,Q9UHK6,P43155,P22307
GO:BP	nucleobase metabolic process	GO:0009112	false	4.6e-07	6.33735	34	172	8	21128	P55263,P07741,P17812,Q9NRF8,P22102,P49915,P00492,P04818
GO:BP	branched-chain amino acid metabolic process	GO:0009081	false	4.6e-07	6.33735	34	172	8	21128	P45954,P24752,Q13825,P30084,O15228,P35914,Q8TB92,Q99714
GO:BP	amino acid biosynthetic process	GO:0008652	false	4.78e-07	6.32031	93	172	11	21128	P24752,P21549,P00374,Q86XF0,O15228,Q9UJM8,P11586,Q9H903,P42898,Q99707,P78330
GO:BP	ribonucleotide catabolic process	GO:0009261	false	5.35e-07	6.27192	51	172	9	21128	P24752,Q01432,P00492,Q9BY32,O95822,Q9BXI3,P49902,Q9H0P0,P21589
GO:BP	branched-chain amino acid catabolic process	GO:0009083	false	5.97e-07	6.2238	22	172	7	21128	P45954,P24752,Q13825,P30084,P35914,Q8TB92,Q99714
GO:BP	purine ribonucleoside metabolic process	GO:0046128	false	5.97e-07	6.2238	22	172	7	21128	P55263,P07741,P00492,Q9BXI3,Q96P26,P49902,P21589
GO:BP	cellular ketone metabolic process	GO:0042180	false	6.51e-07	6.18667	219	172	15	21128	P28330,P49748,P50416,Q9BTZ2,P07148,O95479,Q99714,Q86WA8,O95822,P55809,Q07869,P22307,P36956,P60174,Q2T9J0
GO:BP	purine nucleotide catabolic process	GO:0006195	false	7.68e-07	6.11461	53	172	9	21128	P24752,Q01432,P00492,Q9BY32,O95822,Q9BXI3,Q96P26,P49902,P21589
GO:BP	regulation of fatty acid oxidation	GO:0046320	false	9.58e-07	6.01871	37	172	8	21128	P28330,P49748,P50416,P07148,Q86WA8,O95822,Q07869,Q2T9J0
GO:BP	glucose catabolic process	GO:0006007	false	1.19569e-06	5.92238	24	172	7	21128	P06733,P09104,P13929,P15259,P14618,P51854,P60174
GO:BP	nucleotide catabolic process	GO:0009166	false	1.24779e-06	5.90386	77	172	10	21128	P24752,Q01432,P00492,Q9BY32,O95822,Q9BXI3,Q96P26,P49902,Q9H0P0,P21589
GO:BP	purine-containing compound catabolic process	GO:0072523	false	1.78243e-06	5.74899	58	172	9	21128	P24752,Q01432,P00492,Q9BY32,O95822,Q9BXI3,Q96P26,P49902,P21589
GO:BP	glycosyl compound metabolic process	GO:1901657	false	1.83396e-06	5.73661	80	172	10	21128	P55263,P07741,P31939,Q86XF0,P00492,Q9BXI3,Q96P26,P49902,Q9H0P0,P21589
GO:BP	sulfur compound biosynthetic process	GO:0044272	false	1.98282e-06	5.70272	166	172	13	21128	P24752,P33121,Q9ULC5,Q9UKU0,P86397,O95822,P11586,Q9H903,P42898,Q99707,P29803,P50897,Q9UMR5
GO:BP	ribonucleoside monophosphate catabolic process	GO:0009158	false	2.32619e-06	5.63335	15	172	6	21128	Q01432,P00492,Q9BXI3,P49902,Q9H0P0,P21589
GO:BP	cellular aromatic compound metabolic process	GO:0006725	false	2.57315e-06	5.58953	8352	172	107	21128	P42765,P24752,P49753,Q8N9L9,O14734,P33121,Q9ULC5,Q9UKU0,P55263,P30566,A0A024R5Q7,Q8N142,O00116,O75891,Q3SY69,P04075,P05062,P09972,P23109,Q01433,Q01432,P05067,P07741,P31939,Q14032,P07738,Q86X55,P04040,Q92793,P17812,Q9NRF8,P00374,Q86XF0,P06733,P09104,P13929,A6NNW6,P22413,P34913,P11413,P22102,P49915,O15228,P06744,Q9BZE4,Q16774,O95479,P04035,Q01581,P00492,Q99714,P51659,P86397,P20839,P12268,Q9BY32,P00…
GO:BP	hexose catabolic process	GO:0019320	false	2.82872e-06	5.54841	42	172	8	21128	P05062,P06733,P09104,P13929,P15259,P14618,P51854,P60174
GO:BP	purine nucleoside bisphosphate biosynthetic process	GO:0034033	false	2.84272e-06	5.54627	61	172	9	21128	P24752,P33121,Q9ULC5,Q9UKU0,P86397,O95822,P29803,P50897,Q9UMR5
GO:BP	nucleoside bisphosphate biosynthetic process	GO:0033866	false	2.84272e-06	5.54627	61	172	9	21128	P24752,P33121,Q9ULC5,Q9UKU0,P86397,O95822,P29803,P50897,Q9UMR5
GO:BP	ribonucleoside bisphosphate biosynthetic process	GO:0034030	false	2.84272e-06	5.54627	61	172	9	21128	P24752,P33121,Q9ULC5,Q9UKU0,P86397,O95822,P29803,P50897,Q9UMR5
GO:BP	purine nucleoside metabolic process	GO:0042278	false	3.00547e-06	5.52209	27	172	7	21128	P55263,P07741,P00492,Q9BXI3,Q96P26,P49902,P21589
GO:BP	'de novo' AMP biosynthetic process	GO:0044208	false	3.42978e-06	5.46473	8	172	5	21128	P30566,A0A024R5Q7,Q8N142,P31939,P22102
GO:BP	'de novo' IMP biosynthetic process	GO:0006189	false	3.42978e-06	5.46473	8	172	5	21128	P42765,P30566,O00116,P31939,P22102
GO:BP	cellular nitrogen compound metabolic process	GO:0034641	false	3.5264e-06	5.45267	8753	172	110	21128	P42765,P28330,P24752,P49753,Q8N9L9,O14734,P33121,Q9ULC5,Q9UKU0,P55263,P30566,A0A024R5Q7,Q8N142,O00116,O75891,Q3SY69,P04075,P05062,P09972,P23109,Q01433,Q01432,P05067,P07741,P31939,Q14032,P07738,Q86X55,P04040,P50416,Q92523,Q8TCG5,P43155,Q92793,P17812,Q9NRF8,P00374,Q86XF0,P68104,P06733,P09104,P13929,A6NNW6,P22413,P11413,P22102,P49915,O15228,P06744,Q9BZE4,Q16774,O95479,P04035,Q01581,P00492,Q99714,P51…
GO:BP	canonical glycolysis	GO:0061621	false	3.69686e-06	5.43217	16	172	6	21128	P06733,P09104,P13929,P15259,P14618,P60174
GO:BP	NADH regeneration	GO:0006735	false	3.69686e-06	5.43217	16	172	6	21128	P06733,P09104,P13929,P15259,P14618,P60174
GO:BP	glucose catabolic process to pyruvate	GO:0061718	false	3.69686e-06	5.43217	16	172	6	21128	P06733,P09104,P13929,P15259,P14618,P60174
GO:BP	purine ribonucleotide catabolic process	GO:0009154	false	4.18922e-06	5.37787	44	172	8	21128	P24752,Q01432,P00492,Q9BY32,O95822,Q9BXI3,P49902,P21589
GO:BP	heterocycle metabolic process	GO:0046483	false	4.22578e-06	5.37409	8296	172	106	21128	P42765,P24752,P49753,Q8N9L9,O14734,P33121,Q9ULC5,Q9UKU0,P55263,P30566,A0A024R5Q7,Q8N142,O00116,O75891,Q3SY69,P04075,P05062,P09972,P23109,Q01433,Q01432,P05067,P07741,P31939,Q14032,P07738,Q86X55,P04040,Q92793,P17812,Q9NRF8,P00374,Q86XF0,P06733,P09104,P13929,A6NNW6,P22413,P34913,P11413,P22102,P49915,O15228,P06744,Q9BZE4,Q16774,O95479,P04035,Q01581,P00492,Q99714,P51659,P86397,P20839,P12268,Q9BY32,P00…
GO:BP	NADP metabolic process	GO:0006739	false	5.05989e-06	5.29586	45	172	8	21128	O75891,Q3SY69,P11413,O95479,P18669,P52209,P37837,P29401
GO:BP	glucose 6-phosphate metabolic process	GO:0051156	false	5.21047e-06	5.28312	29	172	7	21128	P11413,P06744,O95479,P18669,P52209,P37837,P29401
GO:BP	monosaccharide catabolic process	GO:0046365	false	6.08293e-06	5.21589	46	172	8	21128	P05062,P06733,P09104,P13929,P15259,P14618,P51854,P60174
GO:BP	nitrogen compound metabolic process	GO:0006807	false	6.32587e-06	5.19888	12235	172	136	21128	P42765,P28330,P45954,P24752,P49753,Q8N9L9,O14734,P33121,Q9ULC5,Q9UKU0,P55263,P30566,A0A024R5Q7,Q8N142,O00116,P21549,O75891,Q3SY69,P04075,P05062,P09972,P23109,Q01433,Q01432,P48728,P05067,P07741,P31939,Q13825,Q14032,P07738,Q86X55,P04040,P50416,Q92523,Q8TCG5,P43155,Q92793,P17812,Q9NRF8,Q16850,Q15392,P00374,Q86XF0,P30084,P68104,P06733,P09104,P13929,A6NNW6,P22413,P07148,Q02790,Q13451,P11413,P22102,P23…
GO:BP	cellular metabolic compound salvage	GO:0043094	false	6.74988e-06	5.1707	30	172	7	21128	P55263,P30566,P23109,Q01433,Q01432,P07741,P00492
GO:BP	nucleobase biosynthetic process	GO:0046112	false	8.45504e-06	5.07288	18	172	6	21128	P07741,P17812,Q9NRF8,P22102,P49915,P00492
GO:BP	glycolytic process through glucose-6-phosphate	GO:0061620	false	8.45504e-06	5.07288	18	172	6	21128	P06733,P09104,P13929,P15259,P14618,P60174
GO:BP	organonitrogen compound catabolic process	GO:1901565	false	1.11761e-05	4.95171	1386	172	34	21128	P28330,P45954,P24752,P21549,O75891,Q3SY69,Q01432,P48728,Q13825,Q16850,P30084,P68104,P23434,P23378,P35914,Q8TB92,P04035,P00492,Q99714,Q9BY32,Q86WA8,O95822,Q99707,Q9BXI3,Q96P26,P49902,Q9H0P0,P21589,Q9P0Z9,P50897,Q9UL12,Q8IUQ4,O60907,Q9BZK7
GO:BP	glycolytic process through fructose-6-phosphate	GO:0061615	false	1.22742e-05	4.91101	19	172	6	21128	P06733,P09104,P13929,P15259,P14618,P60174
GO:BP	nucleoside monophosphate catabolic process	GO:0009125	false	1.22742e-05	4.91101	19	172	6	21128	Q01432,P00492,Q9BXI3,P49902,Q9H0P0,P21589
GO:BP	acetyl-CoA metabolic process	GO:0006084	false	1.38764e-05	4.85772	33	172	7	21128	P24752,Q01581,O95822,Q99707,P53602,P29803,Q9P0Z9
GO:BP	purine nucleoside monophosphate catabolic process	GO:0009128	false	1.52314e-05	4.81726	10	172	5	21128	Q01432,P00492,Q9BXI3,P49902,P21589
GO:BP	purine ribonucleoside monophosphate catabolic process	GO:0009169	false	1.52314e-05	4.81726	10	172	5	21128	Q01432,P00492,Q9BXI3,P49902,P21589
GO:BP	regulation of fatty acid beta-oxidation	GO:0031998	false	1.74166e-05	4.75904	20	172	6	21128	P50416,P07148,Q86WA8,O95822,Q07869,Q2T9J0
GO:BP	pentose-phosphate shunt	GO:0006098	false	1.74166e-05	4.75904	20	172	6	21128	P11413,O95479,P18669,P52209,P37837,P29401
GO:BP	response to nutrient levels	GO:0031667	false	2.55167e-05	4.59318	478	172	19	21128	P24752,P33121,P30566,P04040,P50416,P11413,O15228,Q15648,P42898,Q15788,P55809,P30613,Q07869,P78330,P19793,P36956,Q12772,Q9BZK7,P04818
GO:BP	ribonucleoside metabolic process	GO:0009119	false	2.65635e-05	4.57571	36	172	7	21128	P55263,P07741,P00492,Q9BXI3,Q96P26,P49902,P21589
GO:BP	monocarboxylic acid biosynthetic process	GO:0072330	false	3.62976e-05	4.44012	211	172	13	21128	P28330,P49748,Q8N9L9,O14734,Q9UHK6,Q14032,P49327,Q99714,P86397,O95822,Q9NWU1,P30613,P22307
GO:BP	AMP salvage	GO:0044209	false	3.9026e-05	4.40865	5	172	4	21128	P55263,P30566,P07741,P00492
GO:BP	GMP salvage	GO:0032263	false	3.9026e-05	4.40865	5	172	4	21128	P55263,P23109,P07741,P00492
GO:BP	fatty-acyl-CoA metabolic process	GO:0035337	false	4.79495e-05	4.31922	39	172	7	21128	P33121,Q9ULC5,Q9UKU0,P51659,P86397,P50897,Q9UMR5
GO:BP	response to extracellular stimulus	GO:0009991	false	6.72113e-05	4.17256	508	172	19	21128	P24752,P33121,P30566,P04040,P50416,P11413,O15228,Q15648,P42898,Q15788,P55809,P30613,Q07869,P78330,P19793,P36956,Q12772,Q9BZK7,P04818
GO:BP	carnitine metabolic process	GO:0009437	false	7.6263e-05	4.11769	13	172	5	21128	P28330,P50416,Q92523,Q8TCG5,P43155
GO:BP	fatty-acyl-CoA biosynthetic process	GO:0046949	false	9.9348e-05	4.00284	26	172	6	21128	P33121,Q9ULC5,Q9UKU0,P86397,P50897,Q9UMR5
GO:BP	monosaccharide biosynthetic process	GO:0046364	false	0.000104279	3.9818	91	172	9	21128	O00116,P09972,P09104,P11413,P06744,P15259,P52209,Q07869,P60174
GO:BP	regulation of fatty acid metabolic process	GO:0019217	false	0.000104279	3.9818	91	172	9	21128	P28330,P49748,P50416,P07148,Q86WA8,O95822,Q07869,P36956,Q2T9J0
GO:BP	folic acid metabolic process	GO:0046655	false	0.000117851	3.92867	14	172	5	21128	Q3SY69,P00374,Q86XF0,P13995,Q9H903
GO:BP	response to nutrient	GO:0007584	false	0.000125308	3.90202	157	172	11	21128	P33121,P30566,P04040,O15228,Q15648,P42898,Q15788,P55809,P30613,P19793,P04818
GO:BP	cellular modified amino acid biosynthetic process	GO:0042398	false	0.000159058	3.79845	46	172	7	21128	O00116,P31939,P00374,Q86XF0,P22102,P11586,Q6UB35
GO:BP	short-chain fatty acid metabolic process	GO:0046459	false	0.000175613	3.75544	15	172	5	21128	P16219,Q8N9L9,P43155,Q9NWU1,O14832
GO:BP	nucleobase-containing small molecule biosynthetic process	GO:0034404	false	0.000175613	3.75544	15	172	5	21128	P55263,P07741,Q86XF0,P00492,P21589
GO:BP	nucleoside biosynthetic process	GO:0009163	false	0.000175613	3.75544	15	172	5	21128	P55263,P07741,Q86XF0,P00492,P21589
GO:BP	organophosphate catabolic process	GO:0046434	false	0.000195824	3.70813	164	172	11	21128	P24752,Q01432,P22413,P00492,Q9BY32,O95822,Q9BXI3,Q96P26,P49902,Q9H0P0,P21589
GO:BP	regulation of cellular ketone metabolic process	GO:0010565	false	0.000209251	3.67933	130	172	10	21128	P28330,P49748,P50416,P07148,O95479,Q86WA8,O95822,Q07869,P36956,Q2T9J0
GO:BP	nucleobase-containing compound metabolic process	GO:0006139	false	0.000227681	3.64267	8125	172	100	21128	P42765,P24752,P49753,Q8N9L9,O14734,P33121,Q9ULC5,Q9UKU0,P55263,P30566,A0A024R5Q7,Q8N142,O00116,O75891,Q3SY69,P04075,P05062,P09972,P23109,Q01433,Q01432,P05067,P07741,P31939,Q14032,P07738,Q86X55,P04040,Q92793,P17812,Q9NRF8,Q86XF0,P06733,P09104,P13929,A6NNW6,P22413,P11413,P22102,P49915,O15228,P06744,Q9BZE4,Q16774,O95479,P04035,Q01581,P00492,Q99714,P51659,P86397,P20839,P12268,Q9BY32,P00338,Q15648,O95…
GO:BP	glycine biosynthetic process	GO:0006545	false	0.000269718	3.56909	7	172	4	21128	P21549,P00374,Q86XF0,Q9UJM8
GO:BP	XMP metabolic process	GO:0097292	false	0.000269718	3.56909	7	172	4	21128	P30566,P31939,P22102,P12268
GO:BP	glyceraldehyde-3-phosphate metabolic process	GO:0019682	false	0.000269718	3.56909	7	172	4	21128	P05062,P37837,P29401,P60174
GO:BP	'de novo' XMP biosynthetic process	GO:0097294	false	0.000269718	3.56909	7	172	4	21128	P30566,P31939,P22102,P12268
GO:BP	XMP biosynthetic process	GO:0097293	false	0.000269718	3.56909	7	172	4	21128	P30566,P31939,P22102,P12268
GO:BP	nucleoside triphosphate biosynthetic process	GO:0009142	false	0.000278528	3.55513	134	172	10	21128	P55263,P04075,P17812,Q9NRF8,P06733,P20839,P12268,P30613,Q07869,P04818
GO:BP	amino-acid betaine metabolic process	GO:0006577	false	0.000357124	3.44718	17	172	5	21128	P28330,P50416,Q92523,Q8TCG5,P43155
GO:BP	sulfur amino acid biosynthetic process	GO:0000097	false	0.000357124	3.44718	17	172	5	21128	P24752,P11586,Q9H903,P42898,Q99707
GO:BP	sulfur amino acid metabolic process	GO:0000096	false	0.000455898	3.34113	33	172	6	21128	P24752,P21549,P11586,Q9H903,P42898,Q99707
GO:BP	fatty acid transmembrane transport	GO:1902001	false	0.000491227	3.30872	18	172	5	21128	P33121,Q9ULC5,P50416,Q92523,O43772
GO:BP	long-chain fatty acid metabolic process	GO:0001676	false	0.000541359	3.26651	110	172	9	21128	P28330,P49753,Q8N9L9,O14734,P33121,Q9ULC5,Q9UKU0,P50416,P22307
GO:BP	very long-chain fatty acid metabolic process	GO:0000038	false	0.000659181	3.181	35	172	6	21128	P49753,Q8N9L9,Q99424,P33121,Q9UKU0,P51659
GO:BP	glycosyl compound biosynthetic process	GO:1901659	false	0.000662282	3.17896	19	172	5	21128	P55263,P07741,Q86XF0,P00492,P21589
GO:BP	pyridine nucleotide metabolic process	GO:0019362	false	0.000781672	3.10698	84	172	8	21128	O75891,Q3SY69,P11413,O95479,P18669,P52209,P37837,P29401
GO:BP	nicotinamide nucleotide metabolic process	GO:0046496	false	0.000781672	3.10698	84	172	8	21128	O75891,Q3SY69,P11413,O95479,P18669,P52209,P37837,P29401
GO:BP	water-soluble vitamin metabolic process	GO:0006767	false	0.00082312	3.08454	58	172	7	21128	Q3SY69,P00374,Q86XF0,P13995,Q9H903,Q99707,P51854
GO:BP	purine nucleobase metabolic process	GO:0006144	false	0.000877237	3.05688	20	172	5	21128	P55263,P07741,P22102,P49915,P00492
GO:BP	regulation of small molecule metabolic process	GO:0062012	false	0.000966566	3.01477	328	172	14	21128	P28330,P49748,P05067,P50416,P06733,P34913,P07148,O95479,Q86WA8,O95822,P18669,Q07869,P36956,Q2T9J0
GO:BP	ketone body catabolic process	GO:0046952	false	0.000981898	3.00793	3	172	3	21128	P24752,P55809,Q9BYC2
GO:BP	dihydrofolate metabolic process	GO:0046452	false	0.000981898	3.00793	3	172	3	21128	P31939,P00374,Q86XF0
GO:BP	adenine metabolic process	GO:0046083	false	0.000981898	3.00793	3	172	3	21128	P07741,P22102,P00492
GO:BP	response to organic cyclic compound	GO:0014070	false	0.00111292	2.95354	933	172	24	21128	P24752,P33121,A0A024R5Q7,P05067,Q86X55,P04040,P50416,P00374,P09104,P22413,Q02790,P11413,P23378,P06744,Q86WA8,Q15648,P42898,P21589,P30613,Q07869,P78330,P19793,P36956,P04818
GO:BP	pyridine-containing compound metabolic process	GO:0072524	false	0.00133351	2.875	90	172	8	21128	O75891,Q3SY69,P11413,O95479,P18669,P52209,P37837,P29401
GO:BP	leucine metabolic process	GO:0006551	false	0.00158764	2.79925	10	172	4	21128	Q13825,O15228,P35914,Q8TB92
GO:BP	purine nucleobase biosynthetic process	GO:0009113	false	0.00158764	2.79925	10	172	4	21128	P07741,P22102,P49915,P00492
GO:BP	response to organic substance	GO:0010033	false	0.00200395	2.69811	2664	172	45	21128	P24752,P33121,A0A024R5Q7,P05067,P07741,P31939,Q86X55,P04040,P50416,Q15392,P00374,P09104,P22413,P49327,Q02790,P11413,P22102,P23378,O15228,P06744,O95479,Q16836,P40939,P55084,P00492,P12268,Q86WA8,Q15648,P42898,Q15788,Q14686,P25208,P21589,P55809,P30613,P14618,Q07869,P78330,P40429,P19793,Q14534,P36956,Q12772,O60506,P04818
GO:BP	cellular nitrogen compound catabolic process	GO:0044270	false	0.00234906	2.62911	462	172	16	21128	P28330,P24752,O75891,Q3SY69,Q01432,P22413,P00492,Q9BY32,O95822,Q9BXI3,Q96P26,P49902,Q9H0P0,Q969T7,P21589,O60506
GO:BP	ether lipid biosynthetic process	GO:0008611	false	0.00247902	2.60572	11	172	4	21128	O00116,P49327,O15228,O00628
GO:BP	cellular lipid biosynthetic process	GO:0097384	false	0.00247902	2.60572	11	172	4	21128	O00116,P49327,O15228,O00628
GO:BP	purine nucleoside biosynthetic process	GO:0042451	false	0.00247902	2.60572	11	172	4	21128	P55263,P07741,P00492,P21589
GO:BP	glycerol ether biosynthetic process	GO:0046504	false	0.00247902	2.60572	11	172	4	21128	O00116,P49327,O15228,O00628
GO:BP	purine ribonucleoside biosynthetic process	GO:0046129	false	0.00247902	2.60572	11	172	4	21128	P55263,P07741,P00492,P21589
GO:BP	adenosine metabolic process	GO:0046085	false	0.00247902	2.60572	11	172	4	21128	Q9BXI3,Q96P26,P49902,P21589
GO:BP	ribonucleoside biosynthetic process	GO:0042455	false	0.00247902	2.60572	11	172	4	21128	P55263,P07741,P00492,P21589
GO:BP	response to oxygen-containing compound	GO:1901700	false	0.00273082	2.56371	1665	172	33	21128	P33121,P05067,P07741,Q86X55,P04040,P50416,P00374,P09104,P22413,P07148,P11413,P23378,O15228,P06744,O95479,Q16836,P40939,P55084,Q15648,P42898,Q99707,Q15788,P21589,P55809,P30613,P14618,Q07869,P78330,P40429,P19793,Q99720,P36956,P04818
GO:BP	ether metabolic process	GO:0018904	false	0.00290868	2.5363	25	172	5	21128	O00116,P34913,P49327,O15228,O00628
GO:BP	carbohydrate derivative catabolic process	GO:1901136	false	0.00295407	2.52958	173	172	10	21128	P24752,Q01432,P07738,P00492,Q9BY32,O95822,Q9BXI3,P49902,Q9H0P0,P21589
GO:BP	methionine biosynthetic process	GO:0009086	false	0.0036949	2.4324	12	172	4	21128	P11586,Q9H903,P42898,Q99707
GO:BP	ether biosynthetic process	GO:1901503	false	0.0036949	2.4324	12	172	4	21128	O00116,P49327,O15228,O00628
GO:BP	pentose-phosphate shunt, oxidative branch	GO:0009051	false	0.00390403	2.40849	4	172	3	21128	P11413,O95479,P52209
GO:BP	cholesterol biosynthetic process via desmosterol	GO:0033489	false	0.00390403	2.40849	4	172	3	21128	Q15392,Q15125,O75845
GO:BP	cholesterol biosynthetic process via lathosterol	GO:0033490	false	0.00390403	2.40849	4	172	3	21128	Q15392,Q15125,O75845
GO:BP	isoleucine catabolic process	GO:0006550	false	0.00390403	2.40849	4	172	3	21128	P45954,P24752,Q99714
GO:BP	carnitine shuttle	GO:0006853	false	0.00390403	2.40849	4	172	3	21128	P50416,Q92523,O43772
GO:BP	aromatic compound catabolic process	GO:0019439	false	0.00406561	2.39087	482	172	16	21128	P24752,O75891,Q3SY69,Q01432,P22413,P34913,P00492,Q9BY32,O95822,Q9BXI3,Q96P26,P49902,Q9H0P0,Q969T7,P21589,O60506
GO:BP	aspartate family amino acid metabolic process	GO:0009066	false	0.00737359	2.13232	52	172	6	21128	A0A024R5Q7,P11586,Q9H903,P42898,Q99707,Q9P0Z9
GO:BP	heterocycle biosynthetic process	GO:0018130	false	0.00779299	2.1083	4150	172	59	21128	P42765,P24752,P33121,Q9ULC5,Q9UKU0,P55263,P30566,A0A024R5Q7,Q8N142,O00116,P04075,P23109,Q01433,Q01432,P05067,P07741,P31939,Q86X55,P04040,Q92793,P17812,Q9NRF8,P00374,Q86XF0,P06733,P22413,P22102,P49915,O15228,Q16774,P00492,P86397,P20839,P12268,Q15648,O95822,P11586,Q6UB35,Q9H903,Q15788,Q14686,P23511,P25208,Q13952,P21589,P29803,P30613,O95602,Q07869,P50897,Q9UMR5,P19793,P80511,Q6STE5,P36956,Q12772,O60…
GO:BP	regulation of lipid metabolic process	GO:0019216	false	0.00811101	2.09093	339	172	13	21128	P28330,P49748,P50416,P34913,P07148,O95479,Q86WA8,O95822,Q07869,P22307,P36956,Q9BZK7,Q2T9J0
GO:BP	organic cyclic compound catabolic process	GO:1901361	false	0.0081527	2.0887	509	172	16	21128	P24752,O75891,Q3SY69,Q01432,P22413,P34913,P00492,Q9BY32,O95822,Q9BXI3,Q96P26,P49902,Q9H0P0,Q969T7,P21589,O60506
GO:BP	aromatic compound biosynthetic process	GO:0019438	false	0.00849648	2.07076	4161	172	59	21128	P42765,P24752,P33121,Q9ULC5,Q9UKU0,P55263,P30566,A0A024R5Q7,Q8N142,O00116,P04075,P23109,Q01433,Q01432,P05067,P07741,P31939,Q86X55,P04040,Q92793,P17812,Q9NRF8,P00374,Q86XF0,P06733,P22413,P22102,P49915,O15228,Q16774,P00492,P86397,P20839,P12268,Q15648,O95822,P11586,Q6UB35,Q9H903,Q15788,Q14686,P23511,P25208,Q13952,P21589,P29803,P30613,O95602,Q07869,P50897,Q9UMR5,P19793,P80511,Q6STE5,P36956,Q12772,O60…
GO:BP	glycine decarboxylation via glycine cleavage system	GO:0019464	false	0.00970152	2.01316	5	172	3	21128	P48728,P23434,P23378
GO:BP	AMP catabolic process	GO:0006196	false	0.00970152	2.01316	5	172	3	21128	Q01432,Q9BXI3,P21589
GO:BP	gluconeogenesis	GO:0006094	false	0.0103827	1.98369	84	172	7	21128	O00116,P09972,P09104,P06744,P15259,Q07869,P60174
GO:BP	isoprenoid biosynthetic process	GO:0008299	false	0.0105278	1.97766	32	172	5	21128	P14324,P04035,Q01581,P48449,P53602
GO:BP	heterocycle catabolic process	GO:0046700	false	0.0106079	1.97437	460	172	15	21128	P24752,O75891,Q3SY69,Q01432,P22413,P00492,Q9BY32,O95822,Q9BXI3,Q96P26,P49902,Q9H0P0,Q969T7,P21589,O60506
GO:BP	hexose biosynthetic process	GO:0019319	false	0.0131235	1.88195	87	172	7	21128	O00116,P09972,P09104,P06744,P15259,Q07869,P60174
GO:BP	methionine metabolic process	GO:0006555	false	0.0132436	1.87799	16	172	4	21128	P11586,Q9H903,P42898,Q99707
GO:BP	response to hormone	GO:0009725	false	0.0136069	1.86624	861	172	21	21128	P24752,P33121,P07741,Q86X55,P04040,Q15392,P22413,Q02790,P06744,Q16836,P40939,Q15648,Q15788,Q14686,P55809,P30613,P14618,Q07869,P19793,P36956,P04818
GO:BP	ribonucleoside triphosphate biosynthetic process	GO:0009201	false	0.0141129	1.85039	123	172	8	21128	P04075,P17812,Q9NRF8,P06733,P20839,P12268,P30613,Q07869
GO:BP	isoprenoid metabolic process	GO:0006720	false	0.0141129	1.85039	123	172	8	21128	Q9BTZ2,P37268,P14324,P04035,Q01581,P48449,P53602,O14832
GO:BP	carbohydrate biosynthetic process	GO:0016051	false	0.0166241	1.77926	210	172	10	21128	O00116,P09972,P09104,P22413,P11413,P06744,P15259,P52209,Q07869,P60174
GO:BP	positive regulation of fatty acid oxidation	GO:0046321	false	0.0172087	1.76425	17	172	4	21128	P50416,P07148,O95822,Q07869
GO:BP	purine deoxyribonucleotide metabolic process	GO:0009151	false	0.0172087	1.76425	17	172	4	21128	P55263,Q16774,Q9BXI3,P49902
GO:BP	serine family amino acid catabolic process	GO:0009071	false	0.0172087	1.76425	17	172	4	21128	P21549,P48728,P23434,P23378
GO:BP	bile acid biosynthetic process	GO:0006699	false	0.0191969	1.71677	36	172	5	21128	O14734,Q9UHK6,Q14032,Q99714,P22307
GO:BP	protein lipoylation	GO:0009249	false	0.0192867	1.71474	6	172	3	21128	P23434,Q9Y234,A6NK58
GO:BP	glycine catabolic process	GO:0006546	false	0.0192867	1.71474	6	172	3	21128	P48728,P23434,P23378
GO:BP	farnesyl diphosphate metabolic process	GO:0045338	false	0.0192867	1.71474	6	172	3	21128	P37268,P14324,Q01581
GO:BP	ketone body biosynthetic process	GO:0046951	false	0.0192867	1.71474	6	172	3	21128	Q86V21,P35914,Q8TB92
GO:BP	leucine catabolic process	GO:0006552	false	0.0192867	1.71474	6	172	3	21128	Q13825,P35914,Q8TB92
GO:BP	response to xenobiotic stimulus	GO:0009410	false	0.0196167	1.70737	425	172	14	21128	P33121,P04040,P50416,P17812,P09104,O15228,Q16774,Q16836,P40939,P42898,P55809,P80511,P36956,P04818
GO:BP	nucleobase-containing compound biosynthetic process	GO:0034654	false	0.0201769	1.69515	4072	172	57	21128	P42765,P24752,P33121,Q9ULC5,Q9UKU0,P55263,P30566,A0A024R5Q7,Q8N142,O00116,P04075,P23109,Q01433,Q01432,P05067,P07741,P31939,Q86X55,P04040,Q92793,P17812,Q9NRF8,Q86XF0,P06733,P22413,P22102,P49915,O15228,Q16774,P00492,P86397,P20839,P12268,Q15648,O95822,P11586,Q9H903,Q15788,Q14686,P23511,P25208,Q13952,P21589,P29803,P30613,O95602,Q07869,P50897,Q9UMR5,P19793,P80511,Q6STE5,P36956,Q12772,O60907,Q9BZK7,P04…
GO:BP	dicarboxylic acid catabolic process	GO:0043649	false	0.0219851	1.65787	18	172	4	21128	Q8N9L9,O14734,O75891,Q3SY69
GO:BP	response to chemical	GO:0042221	false	0.0227688	1.64266	4088	172	57	21128	P42765,P24752,P33121,P30566,A0A024R5Q7,P05067,P07741,P31939,Q86X55,P04040,P50416,P17812,Q15392,P00374,P06733,P09104,P22413,P34913,P07148,P49327,Q02790,P11413,P22102,P23378,O15228,P06744,Q16774,O95479,Q16836,P40939,P55084,P00492,P12268,Q86WA8,Q15648,P42898,Q99707,Q15788,Q14686,P25208,P21589,P55809,P15259,P30613,P14618,Q07869,P78330,P40429,P19793,P80511,Q8IUQ4,Q99720,Q14534,P36956,Q12772,O60506,P04…
GO:BP	regulation of lipid catabolic process	GO:0050994	false	0.0228548	1.64102	63	172	6	21128	P50416,P07148,Q86WA8,O95822,Q07869,Q2T9J0
GO:BP	response to fatty acid	GO:0070542	false	0.0228548	1.64102	63	172	6	21128	P33121,P04040,P50416,P23378,O15228,P36956
GO:BP	thyroid hormone mediated signaling pathway	GO:0002154	false	0.0335495	1.47431	7	172	3	21128	Q15648,Q15788,P19793
GO:BP	purine ribonucleoside salvage	GO:0006166	false	0.0335495	1.47431	7	172	3	21128	P55263,P07741,P00492
GO:BP	ether lipid metabolic process	GO:0046485	false	0.0343696	1.46383	20	172	4	21128	O00116,P49327,O15228,O00628
GO:BP	glycerol ether metabolic process	GO:0006662	false	0.0343696	1.46383	20	172	4	21128	O00116,P49327,O15228,O00628
GO:BP	long-chain fatty acid transport	GO:0015909	false	0.0356008	1.44854	68	172	6	21128	P33121,Q9ULC5,P50416,Q92523,P07148,O43772
GO:BP	fatty acid transport	GO:0015908	false	0.0399021	1.399	103	172	7	21128	P33121,Q9ULC5,P50416,Q92523,P07148,Q07869,O43772
GO:BP	cellular nitrogen compound biosynthetic process	GO:0044271	false	0.0404298	1.3933	4890	172	64	21128	P42765,P24752,P33121,Q9ULC5,Q9UKU0,P55263,P30566,A0A024R5Q7,Q8N142,O00116,P04075,P23109,Q01433,Q01432,P05067,P07741,P31939,Q86X55,P04040,Q92793,P17812,Q9NRF8,P00374,Q86XF0,P68104,P06733,P22413,P22102,P49915,O15228,Q16774,P00492,P86397,P20839,P12268,Q15648,O95822,P11586,Q6UB35,Q9H903,Q15788,Q14686,P23511,P25208,Q13952,Q969T7,P21589,P29803,P30613,P14618,O95602,Q07869,P50897,Q9UMR5,P40429,P19793,P80…
GO:BP	cellular aldehyde metabolic process	GO:0006081	false	0.0456546	1.34052	71	172	6	21128	P21549,P05062,Q9BTZ2,P37837,P29401,P60174
GO:CC	microbody lumen	GO:0031907	false	6.3e-44	43.2006	51	174	28	22112	P49753,Q8N9L9,O14734,Q99424,O15254,O00116,P21549,Q9UHK6,Q14032,P04040,P43155,Q9BTZ2,Q13011,O75521,P34913,P07148,O15228,Q9UJM8,Q9NYQ3,P35914,P51659,Q86WA8,O95822,O00628,O14832,Q9P0Z9,P22307,Q2T9J0
GO:CC	peroxisomal matrix	GO:0005782	false	6.3e-44	43.2006	51	174	28	22112	P49753,Q8N9L9,O14734,Q99424,O15254,O00116,P21549,Q9UHK6,Q14032,P04040,P43155,Q9BTZ2,Q13011,O75521,P34913,P07148,O15228,Q9UJM8,Q9NYQ3,P35914,P51659,Q86WA8,O95822,O00628,O14832,Q9P0Z9,P22307,Q2T9J0
GO:CC	microbody	GO:0042579	false	7.94e-37	36.1001	144	174	33	22112	P49753,Q8N9L9,O14734,Q99424,O15254,P33121,Q9UKU0,O00116,P21549,Q9UHK6,Q14032,P04040,P43155,Q9BTZ2,Q13011,O75521,P34913,P07148,O15228,Q9UJM8,Q9NYQ3,P35914,P04035,P51659,P12268,Q86WA8,O95822,O00628,O14832,Q9P0Z9,P22307,P29401,Q2T9J0
GO:CC	cytosol	GO:0005829	false	1.59e-28	27.7991	5440	174	115	22112	Q86V21,Q9BWD1,P49753,Q8N9L9,O14734,Q99424,O15254,P55263,P30566,A0A024R5Q7,Q8N142,O00116,P21549,O75891,P04075,P05062,P09972,Q9UHK6,P23109,Q01433,Q01432,P05067,P07741,P31939,Q14032,P07738,Q86X55,P04040,Q3L8U1,P43155,Q92793,P17812,Q9NRF8,Q8NHQ9,Q15392,P00374,Q86XF0,Q9BTZ2,Q13011,O75521,P68104,P06733,P09104,P13929,A6NNW6,P34913,P07148,P49327,P14324,Q02790,Q13451,P11413,P22102,P49915,O15228,P06744,Q9B…
GO:CC	mitochondrial matrix	GO:0005759	false	6.17e-17	16.2097	489	174	31	22112	P42765,P28330,P16219,P45954,P49748,P24752,P49753,Q3SY69,P48728,Q13825,Q86XF0,P30084,P23434,P23378,Q16836,P40939,P55084,P35914,Q99714,P86397,Q9Y234,A6NK58,O95822,Q6UB35,P13995,Q9H903,P55809,Q9BYC2,P29803,Q9UL12,P04818
GO:CC	membrane-enclosed lumen	GO:0031974	false	2.51e-14	13.5996	6627	174	105	22112	P42765,P28330,P16219,P45954,P49748,P24752,P49753,Q8N9L9,O14734,Q99424,O15254,Q9ULC5,P55263,O00116,P21549,Q3SY69,P04075,P09972,Q9UHK6,Q01432,P48728,P05067,P07741,Q13825,Q14032,Q86X55,P04040,Q3L8U1,P43155,Q92793,Q8NHQ9,Q86XF0,Q9BTZ2,Q13011,P30084,O75521,P68104,P34913,P07148,P14324,Q02790,Q13451,P23434,P23378,O15228,P06744,Q9BZE4,O95479,Q16836,P40939,P55084,Q9UJM8,Q9NYQ3,P35914,Q99714,P51659,P86397,…
GO:CC	organelle lumen	GO:0043233	false	2.51e-14	13.5996	6627	174	105	22112	P42765,P28330,P16219,P45954,P49748,P24752,P49753,Q8N9L9,O14734,Q99424,O15254,Q9ULC5,P55263,O00116,P21549,Q3SY69,P04075,P09972,Q9UHK6,Q01432,P48728,P05067,P07741,Q13825,Q14032,Q86X55,P04040,Q3L8U1,P43155,Q92793,Q8NHQ9,Q86XF0,Q9BTZ2,Q13011,P30084,O75521,P68104,P34913,P07148,P14324,Q02790,Q13451,P23434,P23378,O15228,P06744,Q9BZE4,O95479,Q16836,P40939,P55084,Q9UJM8,Q9NYQ3,P35914,Q99714,P51659,P86397,…
GO:CC	intracellular organelle lumen	GO:0070013	false	2.51e-14	13.5996	6627	174	105	22112	P42765,P28330,P16219,P45954,P49748,P24752,P49753,Q8N9L9,O14734,Q99424,O15254,Q9ULC5,P55263,O00116,P21549,Q3SY69,P04075,P09972,Q9UHK6,Q01432,P48728,P05067,P07741,Q13825,Q14032,Q86X55,P04040,Q3L8U1,P43155,Q92793,Q8NHQ9,Q86XF0,Q9BTZ2,Q13011,P30084,O75521,P68104,P34913,P07148,P14324,Q02790,Q13451,P23434,P23378,O15228,P06744,Q9BZE4,O95479,Q16836,P40939,P55084,Q9UJM8,Q9NYQ3,P35914,Q99714,P51659,P86397,…
GO:CC	intracellular anatomical structure	GO:0005622	false	7.38e-13	12.1322	17853	174	173	22112	Q86V21,P42765,P28330,P16219,P45954,P49748,P24752,Q9BWD1,P49753,Q8N9L9,O14734,Q99424,O15254,P33121,Q9ULC5,Q9UKU0,P55263,P30566,A0A024R5Q7,Q8N142,O00116,P21549,O75891,Q3SY69,P04075,P05062,P09972,Q9UHK6,P23109,Q01433,Q01432,P48728,P05067,P07741,P31939,Q13825,Q14032,P07738,Q6FII3,Q86X55,P04040,Q3L8U1,P50416,Q92523,Q8TCG5,P43155,Q92793,P17812,Q9NRF8,Q16850,Q8NHQ9,Q15392,P00374,Q86XF0,Q9BTZ2,Q15125,Q13…
GO:CC	microbody membrane	GO:0031903	false	3.01e-08	7.52096	66	174	10	22112	P33121,Q9UKU0,O00116,P04040,Q9BTZ2,O15228,P04035,P51659,P12268,O00628
GO:CC	peroxisomal membrane	GO:0005778	false	3.01e-08	7.52096	66	174	10	22112	P33121,Q9UKU0,O00116,P04040,Q9BTZ2,O15228,P04035,P51659,P12268,O00628
GO:CC	membrane-bounded organelle	GO:0043227	false	5.1e-07	6.29283	15667	174	156	22112	P42765,P28330,P16219,P45954,P49748,P24752,Q9BWD1,P49753,Q8N9L9,O14734,Q99424,O15254,P33121,Q9ULC5,Q9UKU0,P55263,A0A024R5Q7,O00116,P21549,O75891,Q3SY69,P04075,P05062,P09972,Q9UHK6,Q01432,P48728,P05067,P07741,P31939,Q13825,Q14032,P07738,Q6FII3,Q86X55,P04040,Q3L8U1,P50416,Q92523,Q8TCG5,P43155,Q92793,Q16850,Q8NHQ9,Q15392,P00374,Q86XF0,Q9BTZ2,Q15125,Q13011,P30084,O75521,P68104,P06733,P09104,P13929,A6N…
GO:CC	phosphopyruvate hydratase complex	GO:0000015	false	1.10252e-06	5.95761	4	174	4	22112	P06733,P09104,P13929,A6NNW6
GO:CC	extracellular exosome	GO:0070062	false	3.71464e-06	5.43008	2109	174	42	22112	P24752,Q9BWD1,A0A024R5Q7,O75891,Q3SY69,P04075,P05062,P09972,P05067,P07741,P31939,P07738,P04040,Q13011,P68104,P06733,P09104,P13929,P34913,P07148,P49327,Q02790,Q13451,P11413,P22102,P06744,P00492,P12268,P00338,P11586,P21589,P18669,P15259,Q8N0Y7,P52209,P30613,P14618,P50897,Q9UMR5,P37837,P29401,P60174
GO:CC	extracellular vesicle	GO:1903561	false	5.15003e-06	5.28819	2133	174	42	22112	P24752,Q9BWD1,A0A024R5Q7,O75891,Q3SY69,P04075,P05062,P09972,P05067,P07741,P31939,P07738,P04040,Q13011,P68104,P06733,P09104,P13929,P34913,P07148,P49327,Q02790,Q13451,P11413,P22102,P06744,P00492,P12268,P00338,P11586,P21589,P18669,P15259,Q8N0Y7,P52209,P30613,P14618,P50897,Q9UMR5,P37837,P29401,P60174
GO:CC	extracellular membrane-bounded organelle	GO:0065010	false	5.21998e-06	5.28233	2134	174	42	22112	P24752,Q9BWD1,A0A024R5Q7,O75891,Q3SY69,P04075,P05062,P09972,P05067,P07741,P31939,P07738,P04040,Q13011,P68104,P06733,P09104,P13929,P34913,P07148,P49327,Q02790,Q13451,P11413,P22102,P06744,P00492,P12268,P00338,P11586,P21589,P18669,P15259,Q8N0Y7,P52209,P30613,P14618,P50897,Q9UMR5,P37837,P29401,P60174
GO:CC	extracellular organelle	GO:0043230	false	5.21998e-06	5.28233	2134	174	42	22112	P24752,Q9BWD1,A0A024R5Q7,O75891,Q3SY69,P04075,P05062,P09972,P05067,P07741,P31939,P07738,P04040,Q13011,P68104,P06733,P09104,P13929,P34913,P07148,P49327,Q02790,Q13451,P11413,P22102,P06744,P00492,P12268,P00338,P11586,P21589,P18669,P15259,Q8N0Y7,P52209,P30613,P14618,P50897,Q9UMR5,P37837,P29401,P60174
GO:CC	ficolin-1-rich granule lumen	GO:1904813	false	1.57482e-05	4.80277	124	174	10	22112	P04075,P09972,Q01432,P04040,P68104,P06744,P20839,P12268,P18669,P14618
GO:CC	intracellular membrane-bounded organelle	GO:0043231	false	0.000196111	3.7075	14610	174	144	22112	P42765,P28330,P16219,P45954,P49748,P24752,Q9BWD1,P49753,Q8N9L9,O14734,Q99424,O15254,P33121,Q9ULC5,Q9UKU0,P55263,A0A024R5Q7,O00116,P21549,Q3SY69,P04075,P09972,Q9UHK6,Q01432,P48728,P05067,P07741,Q13825,Q14032,Q6FII3,Q86X55,P04040,Q3L8U1,P50416,Q92523,Q8TCG5,P43155,Q92793,Q16850,Q8NHQ9,Q15392,P00374,Q86XF0,Q9BTZ2,Q15125,Q13011,P30084,O75521,P68104,P06733,P22413,P34913,P07148,P49327,P37268,P14324,Q02…
GO:CC	secretory granule lumen	GO:0034774	false	0.000481404	3.31749	320	174	13	22112	P04075,P09972,Q01432,P05067,P07741,P04040,P68104,P06744,P20839,P12268,P18669,P14618,P80511
GO:CC	cytoplasmic vesicle lumen	GO:0060205	false	0.00053377	3.27265	323	174	13	22112	P04075,P09972,Q01432,P05067,P07741,P04040,P68104,P06744,P20839,P12268,P18669,P14618,P80511
GO:CC	vesicle lumen	GO:0031983	false	0.000571438	3.24303	325	174	13	22112	P04075,P09972,Q01432,P05067,P07741,P04040,P68104,P06744,P20839,P12268,P18669,P14618,P80511
GO:CC	ficolin-1-rich granule	GO:0101002	false	0.000615223	3.21097	184	174	10	22112	P04075,P09972,Q01432,P04040,P68104,P06744,P20839,P12268,P18669,P14618
GO:CC	organelle	GO:0043226	false	0.000801337	3.09618	16765	174	156	22112	P42765,P28330,P16219,P45954,P49748,P24752,Q9BWD1,P49753,Q8N9L9,O14734,Q99424,O15254,P33121,Q9ULC5,Q9UKU0,P55263,A0A024R5Q7,O00116,P21549,O75891,Q3SY69,P04075,P05062,P09972,Q9UHK6,Q01432,P48728,P05067,P07741,P31939,Q13825,Q14032,P07738,Q6FII3,Q86X55,P04040,Q3L8U1,P50416,Q92523,Q8TCG5,P43155,Q92793,Q16850,Q8NHQ9,Q15392,P00374,Q86XF0,Q9BTZ2,Q15125,Q13011,P30084,O75521,P68104,P06733,P09104,P13929,A6N…
GO:CC	CCAAT-binding factor complex	GO:0016602	false	0.00280164	2.55259	6	174	3	22112	P23511,P25208,Q13952
GO:CC	nuclear outer membrane-endoplasmic reticulum membrane network	GO:0042175	false	0.00550834	2.25898	1179	174	24	22112	P33121,Q9ULC5,Q9UKU0,Q6FII3,Q8TCG5,Q16850,Q15392,Q9BTZ2,Q15125,P06733,P37268,Q8TB92,P04035,P56937,Q14739,P48449,Q15800,Q15738,O75845,Q99720,Q14534,P36956,Q12772,P29401
GO:CC	endoplasmic reticulum membrane	GO:0005789	false	0.011916	1.92387	1156	174	23	22112	P33121,Q9ULC5,Q9UKU0,Q6FII3,Q8TCG5,Q16850,Q15392,Q9BTZ2,Q15125,P37268,Q8TB92,P04035,P56937,Q14739,P48449,Q15800,Q15738,O75845,Q99720,Q14534,P36956,Q12772,P29401
GO:CC	endoplasmic reticulum subcompartment	GO:0098827	false	0.0127333	1.89506	1161	174	23	22112	P33121,Q9ULC5,Q9UKU0,Q6FII3,Q8TCG5,Q16850,Q15392,Q9BTZ2,Q15125,P37268,Q8TB92,P04035,P56937,Q14739,P48449,Q15800,Q15738,O75845,Q99720,Q14534,P36956,Q12772,P29401
GO:CC	endoplasmic reticulum	GO:0005783	false	0.014124	1.85004	2033	174	33	22112	P33121,Q9ULC5,Q9UKU0,P05067,Q6FII3,P04040,Q8TCG5,P43155,Q16850,Q15392,Q9BTZ2,Q15125,P37268,O95479,P55084,Q8TB92,P04035,P56937,P42858,Q14739,P48449,Q15800,Q15738,Q9H0P0,P14618,O75845,P22307,Q99720,Q14534,P36956,Q12772,O60506,P29401
GO:CC	organelle envelope	GO:0031967	false	0.0175875	1.7548	1268	174	24	22112	P28330,P49748,P33121,Q9ULC5,Q9UKU0,P05067,P04040,P50416,Q92523,Q8TCG5,P43155,Q86XF0,Q15125,P06733,O15228,Q9BZE4,P40939,P55084,Q14739,Q9H903,Q99720,O43772,P36956,P04818
GO:CC	envelope	GO:0031975	false	0.0175875	1.7548	1268	174	24	22112	P28330,P49748,P33121,Q9ULC5,Q9UKU0,P05067,P04040,P50416,Q92523,Q8TCG5,P43155,Q86XF0,Q15125,P06733,O15228,Q9BZE4,P40939,P55084,Q14739,Q9H903,Q99720,O43772,P36956,P04818
GO:CC	fatty acid beta-oxidation multienzyme complex	GO:0036125	false	0.018324	1.73698	2	174	2	22112	P40939,P55084
GO:CC	mitochondrial fatty acid beta-oxidation multienzyme complex	GO:0016507	false	0.018324	1.73698	2	174	2	22112	P40939,P55084
GO:CC	extracellular space	GO:0005615	false	0.0289814	1.53788	3379	174	46	22112	P24752,Q9BWD1,A0A024R5Q7,O75891,Q3SY69,P04075,P05062,P09972,P05067,P07741,P31939,P07738,P04040,Q13011,P68104,P06733,P09104,P13929,P22413,P34913,P07148,P49327,Q02790,Q13451,P11413,P22102,P06744,P00492,P12268,P00338,P11586,P13995,P21589,P18669,P15259,Q8N0Y7,P52209,P30613,P14618,P50897,Q9UMR5,P80511,P37837,Q96RS0,P29401,P60174
GO:CC	organelle outer membrane	GO:0031968	false	0.0370568	1.43113	240	174	9	22112	P33121,Q9ULC5,Q9UKU0,P50416,Q92523,Q8TCG5,P06733,P55084,Q99720
GO:CC	outer membrane	GO:0019867	false	0.0394504	1.40395	242	174	9	22112	P33121,Q9ULC5,Q9UKU0,P50416,Q92523,Q8TCG5,P06733,P55084,Q99720
GO:CC	vesicle	GO:0031982	false	0.0483869	1.31527	3973	174	51	22112	P24752,Q9BWD1,A0A024R5Q7,O75891,Q3SY69,P04075,P05062,P09972,Q01432,P05067,P07741,P31939,P07738,Q6FII3,P04040,Q15125,Q13011,P68104,P06733,P09104,P13929,P34913,P07148,P49327,Q02790,Q13451,P11413,P22102,P06744,P00492,P42858,P20839,P12268,P00338,P11586,P21589,P18669,P15259,Q8N0Y7,P52209,P30613,P14618,P50897,Q9UMR5,P80511,Q99720,P36956,Q12772,P37837,P29401,P60174
KEGG	Metabolic pathways	KEGG:01100	false	1.55e-58	57.8084	1532	162	126	8091	Q86V21,P42765,P28330,P16219,P45954,P49748,P24752,Q9BWD1,P49753,Q8N9L9,O14734,Q99424,O15254,P33121,Q9ULC5,Q9UKU0,P55263,P30566,A0A024R5Q7,Q8N142,O00116,P21549,O75891,Q3SY69,P04075,P05062,P09972,Q9UHK6,P23109,Q01433,Q01432,P48728,P07741,P31939,Q13825,Q14032,P07738,P04040,P17812,Q9NRF8,Q16850,Q15392,P00374,Q86XF0,Q9BTZ2,Q15125,P30084,P06733,P09104,P13929,A6NNW6,P22413,P34913,P49327,P37268,P14324,P11…
KEGG	Nucleotide metabolism	KEGG:01232	false	9.66e-20	19.0148	85	162	24	8091	P55263,P30566,A0A024R5Q7,Q8N142,P23109,Q01433,Q01432,P07741,P17812,Q9NRF8,P22413,P49915,Q16774,P00492,P20839,P12268,Q9BY32,Q9BXI3,Q96P26,P49902,Q9H0P0,Q969T7,P21589,P04818
KEGG	Valine, leucine and isoleucine degradation	KEGG:00280	false	1.42e-15	14.8465	48	162	17	8091	Q86V21,P42765,P16219,P45954,P24752,Q9BWD1,Q13825,P30084,Q16836,P40939,P55084,P35914,Q8TB92,Q01581,Q99714,P55809,Q9BYC2
KEGG	Biosynthesis of amino acids	KEGG:01230	false	1.54e-14	13.8136	74	162	19	8091	P04075,P05062,P09972,P06733,P09104,P13929,A6NNW6,Q99707,P18669,P15259,Q8N0Y7,P30613,P14618,P78330,P37837,P29401,P51854,Q9H0I9,P60174
KEGG	Glycolysis / Gluconeogenesis	KEGG:00010	false	8.17e-13	12.088	67	162	17	8091	P04075,P05062,P09972,P07738,P06733,P09104,P13929,A6NNW6,P06744,P00338,P29803,P18669,P15259,Q8N0Y7,P30613,P14618,P60174
KEGG	Steroid biosynthesis	KEGG:00100	false	2.13e-12	11.6726	20	162	11	8091	Q16850,Q15392,Q15125,P37268,P56937,Q14739,P48449,Q15800,Q15738,O75845,Q14534
KEGG	Butanoate metabolism	KEGG:00650	false	3.71e-12	11.4312	27	162	12	8091	Q86V21,P16219,P24752,Q9BWD1,P30084,Q16836,P40939,P35914,Q8TB92,Q01581,P55809,Q9BYC2
KEGG	Purine metabolism	KEGG:00230	false	4.15e-12	11.3818	126	162	21	8091	P55263,P30566,A0A024R5Q7,Q8N142,P23109,Q01433,Q01432,P07741,P31939,P22413,P22102,P49915,Q16774,P00492,P20839,P12268,Q9BY32,Q9BXI3,Q96P26,P49902,P21589
KEGG	Pentose phosphate pathway	KEGG:00030	false	5.82e-10	9.23543	30	162	11	8091	P04075,P05062,P09972,P11413,P06744,O95479,P52209,P37837,P29401,P51854,Q9H0I9
KEGG	Glycine, serine and threonine metabolism	KEGG:00260	false	1.53e-08	7.81607	39	162	11	8091	P21549,P48728,P07738,P23434,P23378,P18669,P15259,Q8N0Y7,Q9P0Z9,P78330,Q9UL12
KEGG	PPAR signaling pathway	KEGG:03320	false	1.85e-08	7.73286	75	162	14	8091	P28330,Q99424,O15254,P33121,Q9ULC5,Q9UKU0,P50416,Q92523,Q8TCG5,P07148,Q01581,Q07869,P19793,P22307
KEGG	Fatty acid elongation	KEGG:00062	false	1.43e-07	6.84521	27	162	9	8091	P42765,P49753,Q8N9L9,P30084,Q16836,P40939,P55084,P50897,Q9UMR5
KEGG	Glyoxylate and dicarboxylate metabolism	KEGG:00630	false	4.14e-07	6.3829	30	162	9	8091	P24752,Q9BWD1,P21549,P48728,P04040,P23434,P23378,Q9UJM8,Q9NYQ3
KEGG	Pyrimidine metabolism	KEGG:00240	false	1.79321e-05	4.74637	58	162	10	8091	P17812,Q9NRF8,P22413,Q9BXI3,Q96P26,P49902,Q9H0P0,Q969T7,P21589,P04818
KEGG	Primary bile acid biosynthesis	KEGG:00120	false	6.06857e-05	4.21691	17	162	6	8091	O14734,Q99424,Q9UHK6,Q14032,P51659,P22307
KEGG	Fatty acid biosynthesis	KEGG:00061	false	8.95272e-05	4.04805	18	162	6	8091	P33121,Q9ULC5,Q9UKU0,P49327,P86397,Q9NWU1
KEGG	Biosynthesis of cofactors	KEGG:01240	false	0.000204861	3.68854	153	162	14	8091	P30566,A0A024R5Q7,Q8N142,P17812,Q9NRF8,P00374,Q86XF0,Q9Y234,A6NK58,P11586,Q6UB35,P13995,Q9H903,Q9NWU1
KEGG	Terpenoid backbone biosynthesis	KEGG:00900	false	0.000336687	3.47277	22	162	6	8091	P24752,Q9BWD1,P14324,P04035,Q01581,P53602
KEGG	Glucagon signaling pathway	KEGG:04922	false	0.00087321	3.05888	107	162	11	8091	P50416,Q92523,Q8TCG5,Q92793,P00338,P29803,P18669,P15259,Q8N0Y7,P14618,Q07869
KEGG	Biosynthesis of unsaturated fatty acids	KEGG:01040	false	0.00122934	2.91033	27	162	6	8091	P49753,Q8N9L9,O15254,Q14032,P51659,P22307
KEGG	Antifolate resistance	KEGG:01523	false	0.00234629	2.62962	30	162	6	8091	P31939,P00374,Q86XF0,P22102,P42898,P04818
KEGG	Propanoate metabolism	KEGG:00640	false	0.00346407	2.46041	32	162	6	8091	P16219,O15254,P30084,P40939,P00338,O95822
KEGG	HIF-1 signaling pathway	KEGG:04066	false	0.00609882	2.21475	109	162	10	8091	P04075,P05062,P09972,Q92793,P06733,P09104,P13929,A6NNW6,P00338,P29803
KEGG	Adipocytokine signaling pathway	KEGG:04920	false	0.00645116	2.19036	69	162	8	8091	P33121,Q9ULC5,Q9UKU0,P50416,Q92523,Q8TCG5,Q07869,P19793
KEGG	Tryptophan metabolism	KEGG:00380	false	0.0148103	1.82944	41	162	6	8091	P24752,Q9BWD1,P04040,P30084,Q16836,P40939
KEGG	Pyruvate metabolism	KEGG:00620	false	0.0320322	1.49441	47	162	6	8091	P24752,Q9BWD1,P00338,P29803,P30613,P14618
KEGG	beta-Alanine metabolism	KEGG:00410	false	0.0337921	1.47118	31	162	5	8091	P16219,O15254,P30084,P40939,O95822
KEGG	Central carbon metabolism in cancer	KEGG:05230	false	0.0472017	1.32604	70	162	7	8091	P11413,P00338,P29803,P18669,P15259,Q8N0Y7,P14618
REAC	Metabolism	REAC:R-HSA-1430728	false	1.47e-74	73.8326	2072	157	137	10777	Q86V21,P42765,P28330,P16219,P45954,P49748,P24752,Q9BWD1,P49753,Q8N9L9,O14734,Q99424,O15254,P33121,Q9ULC5,Q9UKU0,P55263,P30566,A0A024R5Q7,Q8N142,O00116,P21549,O75891,Q3SY69,P04075,P05062,P09972,Q9UHK6,P23109,Q01433,Q01432,P48728,P07741,P31939,Q13825,Q14032,P07738,Q86X55,Q3L8U1,P50416,Q92523,P43155,Q92793,P17812,Q9NRF8,Q16850,Q15392,P00374,Q86XF0,Q15125,P30084,P06733,P09104,P13929,P22413,P34913,P07…
REAC	Activation of gene expression by SREBF (SREBP)	REAC:R-HSA-2426168	false	2.45e-34	33.6104	40	157	25	10777	Q86X55,Q3L8U1,Q92793,Q16850,P49327,P37268,P14324,Q01581,P48449,Q15648,P53602,Q15788,Q14686,P23511,P25208,Q13952,Q07869,P19793,O75845,Q6STE5,Q14534,Q12772,O60907,Q9BZK7,Q96RS0
REAC	Regulation of cholesterol biosynthesis by SREBP (SREBF)	REAC:R-HSA-1655829	false	4.72e-30	29.3259	53	157	25	10777	Q86X55,Q3L8U1,Q92793,Q16850,P49327,P37268,P14324,Q01581,P48449,Q15648,P53602,Q15788,Q14686,P23511,P25208,Q13952,Q07869,P19793,O75845,Q6STE5,Q14534,Q12772,O60907,Q9BZK7,Q96RS0
REAC	RORA activates gene expression	REAC:R-HSA-1368082	false	1.37e-20	19.8619	18	157	14	10777	Q86X55,Q3L8U1,P50416,Q92793,Q15648,Q15788,Q14686,Q07869,P19793,Q6STE5,P36956,O60907,Q9BZK7,Q96RS0
REAC	Metabolism of nucleotides	REAC:R-HSA-15869	false	4.4e-20	19.357	91	157	23	10777	P55263,P30566,A0A024R5Q7,Q8N142,P23109,Q01433,Q01432,P07741,P31939,P17812,Q9NRF8,P22102,P49915,Q16774,P00492,P20839,P12268,Q9BY32,Q9BXI3,Q96P26,P49902,P21589,P04818
REAC	Protein localization	REAC:R-HSA-9609507	false	7.68e-18	17.1146	158	157	26	10777	P49753,Q8N9L9,O14734,Q99424,O15254,O00116,P21549,Q9UHK6,P05067,Q14032,P04040,P43155,Q9BTZ2,Q13011,P34913,O15228,Q9UJM8,Q9NYQ3,P35914,P51659,Q86WA8,O00628,O14832,Q9P0Z9,P22307,Q2T9J0
REAC	PPARA activates gene expression	REAC:R-HSA-1989781	false	3.41e-15	14.4671	113	157	21	10777	P33121,Q86X55,Q3L8U1,P50416,Q92793,P07148,P37268,Q01581,Q15648,Q15788,Q14686,P23511,P25208,Q13952,Q07869,P19793,Q6STE5,Q12772,O60907,Q9BZK7,Q96RS0
REAC	Regulation of lipid metabolism by PPARalpha	REAC:R-HSA-400206	false	4.13e-15	14.384	114	157	21	10777	P33121,Q86X55,Q3L8U1,P50416,Q92793,P07148,P37268,Q01581,Q15648,Q15788,Q14686,P23511,P25208,Q13952,Q07869,P19793,Q6STE5,Q12772,O60907,Q9BZK7,Q96RS0
REAC	BMAL1:CLOCK,NPAS2 activates circadian gene expression	REAC:R-HSA-1368108	false	3.78e-13	12.423	27	157	12	10777	Q86X55,Q3L8U1,Q92793,Q15648,Q15788,Q14686,Q07869,P19793,Q6STE5,O60907,Q9BZK7,Q96RS0
REAC	Metabolism of folate and pterines	REAC:R-HSA-196757	false	1.08e-10	9.96671	16	157	9	10777	O75891,Q3SY69,P00374,Q86XF0,P11586,Q6UB35,P13995,Q9H903,P42898
REAC	Purine ribonucleoside monophosphate biosynthesis	REAC:R-HSA-73817	false	1.18e-10	9.92695	11	157	8	10777	P30566,A0A024R5Q7,Q8N142,P31939,P22102,P49915,P20839,P12268
REAC	Circadian Clock	REAC:R-HSA-400253	false	2.38e-10	9.62273	67	157	14	10777	Q86X55,Q3L8U1,P50416,Q92793,Q15648,Q15788,Q14686,Q07869,P19793,Q6STE5,P36956,O60907,Q9BZK7,Q96RS0
REAC	Heme signaling	REAC:R-HSA-9707616	false	8.84e-10	9.05376	47	157	12	10777	Q86X55,Q3L8U1,Q92793,Q15648,Q15788,Q14686,Q07869,P19793,Q6STE5,O60907,Q9BZK7,Q96RS0
REAC	Cytoprotection by HMOX1	REAC:R-HSA-9707564	false	1.59e-09	8.79893	62	157	13	10777	Q86X55,Q3L8U1,Q92793,P07148,Q15648,Q15788,Q14686,Q07869,P19793,Q6STE5,O60907,Q9BZK7,Q96RS0
REAC	Nucleotide biosynthesis	REAC:R-HSA-8956320	false	2.07e-09	8.68299	14	157	8	10777	P30566,A0A024R5Q7,Q8N142,P31939,P22102,P49915,P20839,P12268
REAC	Transcriptional activation of mitochondrial biogenesis	REAC:R-HSA-2151201	false	4.18e-09	8.37831	53	157	12	10777	Q86X55,Q3L8U1,Q92793,Q15648,Q15788,Q14686,Q07869,P19793,Q6STE5,O60907,Q9BZK7,Q96RS0
REAC	Gluconeogenesis	REAC:R-HSA-70263	false	6.94e-09	8.15883	32	157	10	10777	P04075,P05062,P09972,P06733,P09104,P13929,P06744,P18669,P15259,P60174
REAC	Peroxisomal lipid metabolism	REAC:R-HSA-390918	false	1.12e-08	7.95192	24	157	9	10777	Q8N9L9,O14734,Q99424,O15254,Q9UHK6,P43155,Q9NYQ3,P51659,O14832
REAC	mitochondrial fatty acid beta-oxidation of saturated fatty acids	REAC:R-HSA-77286	false	1.68e-08	7.77497	11	157	7	10777	P28330,P16219,P49748,P30084,Q16836,P40939,P55084
REAC	Transcriptional regulation of white adipocyte differentiation	REAC:R-HSA-381340	false	6.64e-08	7.17769	82	157	13	10777	Q86X55,Q3L8U1,Q92793,Q15648,Q15788,Q14686,Q07869,P19793,Q6STE5,Q12772,O60907,Q9BZK7,Q96RS0
REAC	Beta-oxidation of pristanoyl-CoA	REAC:R-HSA-389887	false	1.04e-07	6.98225	8	157	6	10777	O14734,Q99424,O15254,Q9UHK6,P43155,P51659
REAC	Cellular response to chemical stress	REAC:R-HSA-9711123	false	1.3e-07	6.88656	191	157	18	10777	Q86X55,P04040,Q3L8U1,Q92793,P07148,P11413,Q15648,Q15788,Q14686,P52209,Q07869,P19793,Q6STE5,P37837,O60907,Q9BZK7,Q96RS0,P29401
REAC	Beta oxidation of hexanoyl-CoA to butanoyl-CoA	REAC:R-HSA-77350	false	2.7e-07	6.56845	5	157	5	10777	P16219,P30084,Q16836,P40939,P55084
REAC	Beta oxidation of lauroyl-CoA to decanoyl-CoA-CoA	REAC:R-HSA-77310	false	2.7e-07	6.56845	5	157	5	10777	P28330,P30084,Q16836,P40939,P55084
REAC	Ketone body metabolism	REAC:R-HSA-74182	false	7.63e-07	6.11768	10	157	6	10777	Q86V21,P24752,P35914,Q8TB92,P55809,Q9BYC2
REAC	Mitochondrial Fatty Acid Beta-Oxidation	REAC:R-HSA-77289	false	9.04e-07	6.04373	37	157	9	10777	P42765,P28330,P16219,P49748,P49753,P30084,Q16836,P40939,P55084
REAC	Glycolysis	REAC:R-HSA-70171	false	1.04313e-06	5.98166	66	157	11	10777	P04075,P05062,P09972,P07738,P06733,P09104,P13929,P06744,P18669,P15259,P60174
REAC	Mitochondrial biogenesis	REAC:R-HSA-1592230	false	3.49325e-06	5.45677	92	157	12	10777	Q86X55,Q3L8U1,Q92793,Q15648,Q15788,Q14686,Q07869,P19793,Q6STE5,O60907,Q9BZK7,Q96RS0
REAC	Glyoxylate metabolism and glycine degradation	REAC:R-HSA-389661	false	4.41763e-06	5.35481	31	157	8	10777	P21549,P48728,P23434,P23378,Q9UJM8,Q9Y234,A6NK58,P29803
REAC	TYSND1 cleaves peroxisomal proteins	REAC:R-HSA-9033500	false	5.53979e-06	5.25651	7	157	5	10777	O00116,P51659,O14832,P22307,Q2T9J0
REAC	Purine salvage	REAC:R-HSA-74217	false	6.01006e-06	5.22112	13	157	6	10777	P55263,P23109,Q01433,Q01432,P07741,P00492
REAC	Metabolism of water-soluble vitamins and cofactors	REAC:R-HSA-196849	false	8.96667e-06	5.04737	121	157	13	10777	O75891,Q3SY69,P00374,Q86XF0,P22413,P49327,P11586,Q6UB35,P13995,Q9H903,P42898,Q99707,P21589
REAC	Synthesis of bile acids and bile salts via 7alpha-hydroxycholesterol	REAC:R-HSA-193368	false	1.07679e-05	4.96787	23	157	7	10777	O14734,Q99424,Q9UHK6,Q14032,P51659,Q15788,P19793
REAC	Glucose metabolism	REAC:R-HSA-70326	false	1.44038e-05	4.84152	84	157	11	10777	P04075,P05062,P09972,P07738,P06733,P09104,P13929,P06744,P18669,P15259,P60174
REAC	Beta oxidation of octanoyl-CoA to hexanoyl-CoA	REAC:R-HSA-77348	false	9.40155e-05	4.0268	5	157	4	10777	P30084,Q16836,P40939,P55084
REAC	Synthesis of bile acids and bile salts	REAC:R-HSA-192105	false	0.000166036	3.7798	33	157	7	10777	O14734,Q99424,Q9UHK6,Q14032,P51659,Q15788,P19793
REAC	Beta oxidation of decanoyl-CoA to octanoyl-CoA-CoA	REAC:R-HSA-77346	false	0.000278843	3.55464	6	157	4	10777	P30084,Q16836,P40939,P55084
REAC	Nucleotide salvage	REAC:R-HSA-8956321	false	0.000313371	3.50394	23	157	6	10777	P55263,P23109,Q01433,Q01432,P07741,P00492
REAC	Fatty acyl-CoA biosynthesis	REAC:R-HSA-75105	false	0.000381051	3.41902	37	157	7	10777	P33121,Q9ULC5,Q9UKU0,P49327,P86397,P50897,Q9UMR5
REAC	Purine catabolism	REAC:R-HSA-74259	false	0.000486212	3.31317	14	157	5	10777	Q9BY32,Q9BXI3,Q96P26,P49902,P21589
REAC	Synthesis of Ketone Bodies	REAC:R-HSA-77111	false	0.0012719	2.89555	8	157	4	10777	Q86V21,P24752,P35914,Q8TB92
REAC	Bile acid and bile salt metabolism	REAC:R-HSA-194068	false	0.0013021	2.88536	44	157	7	10777	O14734,Q99424,Q9UHK6,Q14032,P51659,Q15788,P19793
REAC	Beta oxidation of palmitoyl-CoA to myristoyl-CoA	REAC:R-HSA-77305	false	0.0013306	2.87595	3	157	3	10777	P49748,P40939,P55084
REAC	Beta oxidation of myristoyl-CoA to lauroyl-CoA	REAC:R-HSA-77285	false	0.0013306	2.87595	3	157	3	10777	P28330,P40939,P55084
REAC	Metabolism of vitamins and cofactors	REAC:R-HSA-196854	false	0.00135002	2.86966	186	157	13	10777	O75891,Q3SY69,P00374,Q86XF0,P22413,P49327,P11586,Q6UB35,P13995,Q9H903,P42898,Q99707,P21589
REAC	Metabolism of amino acids and derivatives	REAC:R-HSA-71291	false	0.00297577	2.5264	369	157	18	10777	P45954,P24752,P21549,P48728,Q13825,P30084,P23434,P23378,Q9UJM8,Q99714,Q9Y234,A6NK58,Q99707,P29803,Q9P0Z9,P78330,P40429,Q9UL12
REAC	Branched-chain amino acid catabolism	REAC:R-HSA-70895	false	0.00455052	2.34194	21	157	5	10777	P45954,P24752,Q13825,P30084,Q99714
REAC	Utilization of Ketone Bodies	REAC:R-HSA-77108	false	0.00526535	2.27857	4	157	3	10777	P24752,P55809,Q9BYC2
REAC	Cholesterol biosynthesis via desmosterol	REAC:R-HSA-6807047	false	0.00526535	2.27857	4	157	3	10777	Q15392,Q15125,O75845
REAC	Cholesterol biosynthesis via lathosterol	REAC:R-HSA-6807062	false	0.00526535	2.27857	4	157	3	10777	Q15392,Q15125,O75845
REAC	Glycine degradation	REAC:R-HSA-6783984	false	0.00526535	2.27857	4	157	3	10777	P48728,P23434,P23378
REAC	Metabolism of carbohydrates	REAC:R-HSA-71387	false	0.00719898	2.14273	284	157	15	10777	P04075,P05062,P09972,P07738,P06733,P09104,P13929,P11413,P06744,P18669,P15259,P52209,P37837,P29401,P60174
REAC	Azathioprine ADME	REAC:R-HSA-9748787	false	0.00734956	2.13374	23	157	5	10777	P49915,Q16774,P00492,P20839,P12268
REAC	alpha-linolenic acid (ALA) metabolism	REAC:R-HSA-2046106	false	0.00859316	2.06585	12	157	4	10777	O14734,P33121,P51659,P22307
REAC	alpha-linolenic (omega3) and linoleic (omega6) acid metabolism	REAC:R-HSA-2046104	false	0.00859316	2.06585	12	157	4	10777	O14734,P33121,P51659,P22307
REAC	Beta oxidation of butanoyl-CoA to acetyl-CoA	REAC:R-HSA-77352	false	0.0130224	1.88531	5	157	3	10777	P16219,P30084,Q16836
REAC	Carnitine metabolism	REAC:R-HSA-200425	false	0.016986	1.76991	14	157	4	10777	P50416,Q92523,P19793,O43772
REAC	Pentose phosphate pathway	REAC:R-HSA-71336	false	0.0229006	1.64015	15	157	4	10777	P11413,P52209,P37837,P29401
REAC	Cellular responses to stress	REAC:R-HSA-2262752	false	0.0234908	1.6291	778	157	26	10777	P49748,Q86X55,P04040,Q3L8U1,Q92793,P68104,P07148,Q02790,Q13451,P11413,Q15648,Q15788,Q14686,P23511,P25208,Q13952,P52209,Q07869,P40429,P19793,Q6STE5,P37837,O60907,Q9BZK7,Q96RS0,P29401
REAC	mitochondrial fatty acid beta-oxidation of unsaturated fatty acids	REAC:R-HSA-77288	false	0.0257659	1.58896	6	157	3	10777	P28330,P40939,P55084
REAC	FOXO-mediated transcription of cell death genes	REAC:R-HSA-9614657	false	0.0301888	1.52015	16	157	4	10777	Q92793,P23511,P25208,Q13952
REAC	Cellular responses to stimuli	REAC:R-HSA-8953897	false	0.0316306	1.49989	792	157	26	10777	P49748,Q86X55,P04040,Q3L8U1,Q92793,P68104,P07148,Q02790,Q13451,P11413,Q15648,Q15788,Q14686,P23511,P25208,Q13952,P52209,Q07869,P40429,P19793,Q6STE5,P37837,O60907,Q9BZK7,Q96RS0,P29401
REAC	Nucleotide catabolism	REAC:R-HSA-8956319	false	0.0337796	1.47135	31	157	5	10777	Q9BY32,Q9BXI3,Q96P26,P49902,P21589
REAC	Signaling by Nuclear Receptors	REAC:R-HSA-9006931	false	0.0384326	1.4153	291	157	14	10777	Q86X55,P50416,Q92523,Q92793,Q9BTZ2,P49327,Q02790,Q13451,Q15648,Q15788,P29803,P19793,O60907,Q9BZK7
WP	Cholesterol metabolism with Bloch and Kandutsch-Russell pathways	WP:WP4718	false	4.6e-23	22.3374	47	139	21	7899	Q9BWD1,P49753,P33121,Q16850,Q15392,Q15125,P49327,P37268,P14324,P04035,Q01581,P56937,Q14739,P48449,Q15800,P53602,Q15738,O75845,Q14534,P36956,Q12772
WP	Fatty acid beta-oxidation	WP:WP143	false	1.06e-17	16.9767	34	139	16	7899	P28330,P16219,P49748,P24752,P33121,Q9ULC5,Q9UKU0,P50416,Q92523,P43155,P30084,Q16836,P40939,P55084,O43772,P60174
WP	Cholesterol synthesis disorders	WP:WP5193	false	1.25e-17	16.9041	18	139	13	7899	Q16850,Q15392,Q15125,P37268,P14324,P04035,Q01581,Q14739,P48449,Q15800,P53602,O75845,Q14534
WP	Cholesterol biosynthesis pathway	WP:WP197	false	7.72e-15	14.1125	15	139	11	7899	Q16850,P37268,P14324,P04035,Q01581,P48449,Q15800,P53602,Q15738,O75845,Q14534
WP	Disorders of folate metabolism and transport	WP:WP4259	false	4.02e-13	12.3953	19	139	11	7899	O75891,Q3SY69,P31939,P00374,P22102,P11586,P13995,Q9H903,P42898,Q99707,P04818
WP	Metabolic reprogramming in colon cancer	WP:WP4290	false	2.59e-11	10.586	42	139	13	7899	P05062,P06733,P49327,P11413,P22102,P06744,P00338,P18669,P52209,P14618,P78330,P37837,P29401
WP	Glycolysis and gluconeogenesis	WP:WP534	false	7.1e-11	10.149	45	139	13	7899	P04075,P05062,P09972,P06733,P09104,P13929,P06744,P00338,P18669,P15259,P30613,P14618,P60174
WP	One-carbon metabolism	WP:WP241	false	1.59e-10	9.79976	29	139	11	7899	O75891,P48728,P31939,P00374,P22102,P11586,Q6UB35,P13995,P42898,Q99707,P04818
WP	Mitochondrial long chain fatty acid beta-oxidation	WP:WP368	false	4.81e-10	9.31818	17	139	9	7899	P28330,P16219,P49748,P33121,P50416,Q16836,P40939,P22307,O43772
WP	Purine metabolism	WP:WP4792	false	1.6e-09	8.79491	13	139	8	7899	P30566,A0A024R5Q7,P23109,P07741,P31939,P00492,P20839,Q9BY32
WP	Mevalonate arm of cholesterol biosynthesis pathway	WP:WP4190	false	1.6e-09	8.79491	13	139	8	7899	P24752,Q9BWD1,P37268,P14324,P35914,P04035,Q01581,P53602
WP	Purine metabolism and related disorders	WP:WP4224	false	9.13e-09	8.03967	22	139	9	7899	P30566,A0A024R5Q7,P23109,P07741,P31939,P22102,P00492,P20839,Q9BY32
WP	Trans-sulfuration, one-carbon metabolism and related pathways	WP:WP2525	false	1.45e-08	7.83823	66	139	13	7899	P48728,Q14032,P00374,Q86XF0,P11586,Q6UB35,P13995,Q9H903,P42898,Q99707,P78330,Q9UL12,P04818
WP	PPAR signaling pathway	WP:WP3942	false	1.77e-08	7.75105	67	139	13	7899	P28330,Q99424,O15254,P33121,Q9ULC5,Q9UKU0,P50416,Q92523,Q8TCG5,P07148,Q07869,P19793,P22307
WP	Cholesterol biosynthesis with skeletal dysplasias	WP:WP4804	false	3.29e-08	7.48342	7	139	6	7899	Q16850,Q15392,Q15125,Q14739,Q15738,O75845
WP	Clear cell renal cell carcinoma pathways	WP:WP4018	false	3.88e-08	7.41102	86	139	14	7899	P04075,P05062,P09972,Q92793,P06733,P09104,P13929,P49327,P06744,P00338,P30613,P14618,P78330,P60174
WP	Aerobic glycolysis	WP:WP4629	false	5.9e-08	7.22888	12	139	7	7899	P04075,P06733,P06744,P00338,P15259,P14618,P60174
WP	7-oxo-C and 7-beta-HC pathways	WP:WP5064	false	7.98e-08	7.09794	27	139	9	7899	P49753,Q8N9L9,O14734,Q99424,Q9UHK6,Q14032,Q15125,P34913,P22307
WP	Fatty acid biosynthesis	WP:WP357	false	3.49e-07	6.45772	22	139	8	7899	P42765,P33121,Q9ULC5,Q9UKU0,Q13011,P30084,P49327,Q16836
WP	Sterol regulatory element-binding proteins (SREBP) signaling	WP:WP1982	false	5.15e-07	6.28808	71	139	12	7899	Q16850,P49327,P37268,P14324,P04035,Q01581,P48449,P53602,P23511,Q14534,P36956,Q12772
WP	Cori cycle	WP:WP1946	false	1.34675e-06	5.87071	17	139	7	7899	P04075,P11413,P06744,P00338,P18669,P37837,P60174
WP	Oxysterols derived from cholesterol	WP:WP4545	false	2.08762e-05	4.68035	48	139	9	7899	P49753,Q8N9L9,O14734,Q99424,Q9UHK6,Q14032,Q15125,P34913,P22307
WP	Leucine, isoleucine and valine metabolism	WP:WP4686	false	2.16209e-05	4.66513	24	139	7	7899	P45954,P24752,Q13825,P30084,Q8TB92,Q99714,O95822
WP	Mitochondrial beta-oxidation	WP:WP5241	false	3.33904e-05	4.47638	9	139	5	7899	P42765,P28330,P45954,P30084,Q99714
WP	SREBF and miR33 in cholesterol and lipid homeostasis	WP:WP2011	false	7.42559e-05	4.12927	18	139	6	7899	P49327,P04035,Q01581,Q07869,P36956,Q12772
WP	Disorders in ketolysis	WP:WP5195	false	8.09086e-05	4.09201	5	139	4	7899	P24752,Q9BWD1,Q01581,P55809
WP	Glycolysis in senescence	WP:WP5049	false	0.000118997	3.92446	11	139	5	7899	P09972,P06733,P11413,P00338,P14618
WP	Pentose phosphate metabolism	WP:WP134	false	0.000550982	3.25886	7	139	4	7899	P11413,P52209,P37837,P29401
WP	Disorders of bile acid synthesis and biliary transport	WP:WP5176	false	0.00351418	2.45418	20	139	5	7899	Q99424,Q9UHK6,Q14032,P51659,P22307
WP	Valproic acid pathway	WP:WP3871	false	0.00727506	2.13816	12	139	4	7899	P45954,P40939,P55084,Q99714
WP	Disorders in ketone body synthesis	WP:WP5175	false	0.00928081	2.03241	5	139	3	7899	P24752,P35914,P55809
WP	PPAR-alpha pathway	WP:WP2878	false	0.0136948	1.86344	26	139	5	7899	P50416,P07148,Q07869,P19793,P22307
WP	Metabolic reprogramming in pancreatic cancer	WP:WP5220	false	0.0148243	1.82903	42	139	6	7899	Q86X55,P49327,P06744,P04035,P00338,P14618
WP	Folate metabolism	WP:WP176	false	0.0348413	1.45791	69	139	7	7899	P04040,P00374,P22102,P11586,P13995,P42898,Q99707
WP	Fatty acid transporters	WP:WP5061	false	0.0414233	1.38276	18	139	4	7899	P33121,Q9ULC5,Q9UKU0,P07148
WP	Serine metabolism	WP:WP4688	false	0.0499889	1.30113	8	139	3	7899	P00374,P78330,P04818
WP	Ketogenesis and ketolysis	WP:WP4742	false	0.0499889	1.30113	8	139	3	7899	P24752,P55809,O43772
TF	Factor: E2F-1; motif: TTGGCGCGRAANNGNM	TF:M00938	false	0.000753743	3.12278	7472	174	98	20012	P42765,P28330,P49748,P24752,P49753,Q8N9L9,O15254,P33121,Q9ULC5,P30566,A0A024R5Q7,Q8N142,O00116,O75891,Q3SY69,P04075,P23109,Q01433,P31939,Q86X55,P04040,Q8TCG5,P43155,Q92793,P17812,Q9NRF8,Q16850,Q8NHQ9,Q15392,P00374,Q86XF0,Q15125,Q13011,P68104,P06733,P09104,P49327,P37268,Q02790,P11413,P22102,P23434,P23378,O15228,P06744,Q16774,O95479,Q16836,P35914,Q8TB92,P00492,P86397,P42858,P12268,Q9BY32,Q14739,P00…
TF	Factor: YY1; motif: CAANATGGCGGC; match class: 1	TF:M10436_1	false	0.0223214	1.65128	2336	174	41	20012	Q86V21,P16219,P45954,P49753,O15254,P55263,P30566,P07741,P31939,Q92523,P43155,Q92793,Q16850,Q15125,Q13011,P13929,P49327,P22102,P23378,P06744,Q16774,P35914,P00492,Q15648,P42898,Q14686,P23511,P25208,P29803,P18669,Q8N0Y7,P52209,O14832,Q9P0Z9,P78330,P40429,P22307,Q8IUQ4,Q14534,P51854,P60174
TF	Factor: GKLF; motif: GCCMCRCCCNNN	TF:M01588	false	0.0454143	1.34281	9111	174	107	20012	Q86V21,P42765,P28330,P16219,P45954,P49748,P24752,Q9BWD1,O14734,P33121,P55263,P30566,A0A024R5Q7,Q8N142,O00116,Q3SY69,P09972,Q9UHK6,P23109,Q01433,P07741,P31939,Q13825,Q6FII3,Q86X55,P04040,Q92523,P43155,Q92793,P17812,Q9NRF8,Q16850,P00374,Q15125,Q13011,P30084,O75521,P06733,P09104,A6NNW6,P22413,P34913,P07148,P49327,P37268,Q02790,P11413,P22102,P23434,P49915,P06744,Q9BZE4,Q16774,O95479,Q16836,P35914,Q8T…
HPA	liver; hepatocytes[High]	HPA:0290403	false	7.87e-11	10.1041	865	147	41	11006	P42765,P16219,P45954,P24752,Q8N9L9,O14734,Q99424,P33121,Q9ULC5,P30566,P21549,O75891,P05062,P48728,P04040,Q13011,P30084,O75521,P07148,P23434,P23378,O95479,Q16836,Q9UJM8,P35914,Q01581,P51659,P42858,Q14739,A6NK58,P48449,P11586,Q6UB35,Q15738,P30613,P50897,Q9UL12,O75845,P22307,Q99720,O43772
HPA	liver; hepatocytes[?Medium]	HPA:0290402	false	3.04e-09	8.51768	3745	147	90	11006	P42765,P28330,P16219,P45954,P49748,P24752,Q9BWD1,P49753,Q8N9L9,O14734,Q99424,P33121,Q9ULC5,P55263,P30566,A0A024R5Q7,P21549,O75891,P05062,Q9UHK6,P48728,P07741,Q13825,Q14032,Q6FII3,Q86X55,P04040,Q3L8U1,P50416,Q92793,Q15392,Q15125,Q13011,P30084,O75521,P68104,P06733,P22413,P34913,P07148,P37268,P14324,Q13451,P23434,P23378,P06744,Q16774,O95479,Q16836,P40939,P55084,Q9UJM8,P35914,Q01581,P00492,Q99714,P51…
HPA	kidney; proximal tubules (cell body)[?Medium]	HPA:0271142	false	7.75e-08	7.1108	566	147	29	11006	P28330,P16219,P45954,P24752,Q9BWD1,P49753,P33121,Q9ULC5,O00116,P21549,O75891,Q9UHK6,P04040,P43155,Q13011,P30084,O75521,P22413,Q13451,P23378,Q16836,P35914,P25208,Q9Y2X3,P55809,P30613,P50897,Q8IUQ4,P29401
HPA	liver	HPA:0290000	false	6.17e-07	6.20955	6292	147	118	11006	Q86V21,P42765,P28330,P16219,P45954,P49748,P24752,Q9BWD1,P49753,Q8N9L9,O14734,Q99424,P33121,Q9ULC5,Q9UKU0,P55263,P30566,A0A024R5Q7,O00116,P21549,O75891,Q3SY69,P04075,P05062,Q9UHK6,Q01433,P48728,P07741,P31939,Q13825,Q14032,P07738,Q6FII3,Q86X55,P04040,Q3L8U1,P50416,Q92793,Q9NRF8,Q15392,Q15125,Q13011,P30084,O75521,P68104,P06733,P22413,P34913,P07148,P37268,P14324,Q02790,Q13451,P11413,P22102,P23434,P23…
HPA	kidney; distal tubules[?Low]	HPA:0271131	false	7.27e-07	6.13828	705	147	31	11006	P28330,P16219,P45954,P24752,Q9BWD1,P49753,P33121,O00116,O75891,Q9UHK6,P07738,Q92523,P43155,Q15392,Q13011,P30084,O75521,P22413,Q13451,P23378,Q16836,P35914,Q15800,P25208,Q9Y2X3,P55809,Q9BYC2,P52209,P50897,Q8IUQ4,P29401
HPA	kidney; distal tubules[?Medium]	HPA:0271132	false	1.04586e-06	5.98053	554	147	27	11006	P28330,P16219,P45954,P24752,Q9BWD1,P49753,P33121,O75891,Q9UHK6,P07738,Q92523,P43155,Q15392,Q13011,P30084,O75521,P22413,Q13451,P23378,Q16836,P35914,P25208,Q9Y2X3,P55809,P52209,P50897,P29401
HPA	kidney; proximal tubules (cell body)[?Low]	HPA:0271141	false	1.51595e-06	5.81931	727	147	31	11006	P28330,P16219,P45954,P24752,Q9BWD1,P49753,P33121,Q9ULC5,O00116,P21549,O75891,Q9UHK6,P04040,P43155,Q13011,P30084,O75521,P22413,Q13451,P23378,Q16836,P35914,Q15800,P25208,Q9Y2X3,P55809,P30613,P50897,Q8IUQ4,P29401,P04818
HPA	kidney; proximal tubules (cell body)[High]	HPA:0271143	false	2.20734e-06	5.65613	287	147	19	11006	P28330,P16219,P45954,P24752,Q9BWD1,P49753,P33121,O75891,Q9UHK6,Q13011,P30084,O75521,Q13451,P23378,Q16836,P35914,Q9Y2X3,P30613,P29401
HPA	liver; hepatocytes[?Low]	HPA:0290401	false	2.30994e-05	4.6364	5743	147	108	11006	Q86V21,P42765,P28330,P16219,P45954,P49748,P24752,Q9BWD1,P49753,Q8N9L9,O14734,Q99424,P33121,Q9ULC5,Q9UKU0,P55263,P30566,A0A024R5Q7,O00116,P21549,O75891,P05062,Q9UHK6,Q01433,P48728,P07741,Q13825,Q14032,P07738,Q6FII3,Q86X55,P04040,Q3L8U1,P50416,Q92793,Q9NRF8,Q15392,Q15125,Q13011,P30084,O75521,P68104,P06733,P22413,P34913,P07148,P37268,P14324,Q13451,P22102,P23434,P23378,P06744,Q16774,O95479,Q16836,P40…
HPA	kidney; distal tubules[High]	HPA:0271133	false	4.16635e-05	4.38024	310	147	18	11006	P28330,P16219,P45954,P24752,P49753,P33121,O75891,P07738,Q13011,P30084,O75521,Q13451,Q16836,P25208,Q9Y2X3,P55809,P50897,P29401
HPA	lung; alveolar cells type II[?Medium]	HPA:0301372	false	0.000136166	3.86593	1233	147	38	11006	P28330,P16219,P24752,Q9BWD1,P49753,P33121,Q9ULC5,P30566,P48728,Q86X55,Q92793,P17812,Q13011,P30084,P06733,Q13451,P11413,Q16836,P55084,P04035,P51659,P48449,Q15788,Q14686,P23511,P25208,Q9Y2X3,Q15738,P52209,O95602,Q07869,P50897,P19793,P22307,Q9BZK7,Q96RS0,P29401,O94811
HPA	lung; alveolar cells type II[?Low]	HPA:0301371	false	0.00025668	3.59061	1533	147	43	11006	P28330,P16219,P49748,P24752,Q9BWD1,P49753,P33121,Q9ULC5,P30566,P48728,Q13825,Q86X55,P50416,Q92793,P17812,Q13011,P30084,P06733,Q13451,P11413,Q16836,P55084,P04035,P51659,P48449,Q15788,Q14686,P23511,P25208,Q9Y2X3,Q15738,Q9NWU1,P52209,O95602,Q07869,P50897,P19793,P22307,Q8IUQ4,Q9BZK7,Q96RS0,P29401,O94811
HPA	lung; alveolar cells type II[High]	HPA:0301373	false	0.000549321	3.26017	662	147	25	11006	P28330,P16219,P24752,Q9BWD1,P33121,Q9ULC5,P48728,P17812,P30084,P06733,Q13451,Q16836,P55084,P04035,P48449,Q15788,P23511,P25208,Q9Y2X3,O95602,Q07869,P19793,P22307,Q9BZK7,Q96RS0
HPA	kidney; collecting ducts[?Low]	HPA:0271121	false	0.00113129	2.94643	599	147	23	11006	P28330,P16219,P45954,P24752,Q9BWD1,P49753,O00116,O75891,P07738,Q92523,P43155,Q13011,P30084,O75521,P23378,Q16836,P35914,P25208,Q9Y2X3,P55809,P50897,Q8IUQ4,P29401
HPA	parathyroid gland; glandular cells[?Medium]	HPA:0360052	false	0.00247632	2.60619	4410	147	85	11006	Q86V21,P42765,P28330,P16219,P45954,P49748,P24752,Q9BWD1,P49753,O14734,Q99424,P33121,P55263,P30566,P04075,P48728,P31939,Q13825,Q6FII3,Q86X55,Q3L8U1,P50416,Q92523,P43155,Q92793,Q9NRF8,Q8NHQ9,Q13011,P30084,O75521,P68104,P06733,P22413,P34913,Q13451,P11413,P22102,P23434,P06744,Q16774,Q16836,P40939,P55084,P35914,P04035,P00492,Q99714,P51659,P42858,P20839,P12268,Q9BY32,A6NK58,P48449,Q15648,O95822,Q15800,…
HPA	kidney	HPA:0270000	false	0.00276311	2.5586	8228	147	131	11006	Q86V21,P42765,P28330,P16219,P45954,P49748,P24752,Q9BWD1,P49753,Q8N9L9,O14734,Q99424,P33121,Q9ULC5,Q9UKU0,P55263,P30566,A0A024R5Q7,O00116,P21549,O75891,Q3SY69,P04075,P05062,Q9UHK6,Q01433,P48728,P07741,P31939,Q13825,P07738,Q6FII3,Q86X55,P04040,Q3L8U1,P50416,Q92523,Q8TCG5,P43155,Q92793,P17812,Q9NRF8,Q8NHQ9,Q15392,Q15125,Q13011,P30084,O75521,P68104,P06733,P22413,P34913,P07148,P37268,P14324,Q02790,Q13…
HPA	lung; alveolar cells type I[?Low]	HPA:0301361	false	0.00384343	2.41528	1091	147	32	11006	P49748,P49753,Q9ULC5,P30566,A0A024R5Q7,Q13825,Q86X55,P50416,Q92793,Q13011,P30084,P06733,Q13451,P11413,Q16836,P51659,P48449,Q15788,Q14686,P23511,P25208,Q9Y2X3,Q15738,Q9NWU1,P52209,O95602,Q07869,P50897,P19793,Q8IUQ4,Q9BZK7,Q96RS0
HPA	skeletal muscle; myocytes[?Low]	HPA:0440341	false	0.00807218	2.09301	5898	147	103	11006	Q86V21,P16219,P49748,P24752,Q9BWD1,P49753,O14734,Q99424,P33121,Q9UKU0,P30566,A0A024R5Q7,Q8N142,O00116,O75891,Q3SY69,P04075,P23109,P48728,P31939,Q13825,P07738,Q6FII3,Q86X55,Q3L8U1,P50416,Q92523,P43155,Q92793,P17812,Q9NRF8,Q8NHQ9,Q13011,P30084,O75521,P68104,P06733,P13929,A6NNW6,P37268,P14324,Q13451,P22102,P23434,P06744,Q16774,O95479,Q16836,P40939,P55084,P35914,P04035,P51659,P56937,P86397,P42858,P12…
HPA	skeletal muscle	HPA:0440000	false	0.00807218	2.09301	5898	147	103	11006	Q86V21,P16219,P49748,P24752,Q9BWD1,P49753,O14734,Q99424,P33121,Q9UKU0,P30566,A0A024R5Q7,Q8N142,O00116,O75891,Q3SY69,P04075,P23109,P48728,P31939,Q13825,P07738,Q6FII3,Q86X55,Q3L8U1,P50416,Q92523,P43155,Q92793,P17812,Q9NRF8,Q8NHQ9,Q13011,P30084,O75521,P68104,P06733,P13929,A6NNW6,P37268,P14324,Q13451,P22102,P23434,P06744,Q16774,O95479,Q16836,P40939,P55084,P35914,P04035,P51659,P56937,P86397,P42858,P12…
HPA	ovary; ovarian stroma cells[?Low]	HPA:0340461	false	0.0105137	1.97824	3981	147	77	11006	Q86V21,P16219,P49748,P24752,Q9BWD1,P49753,O14734,P30566,A0A024R5Q7,Q3SY69,P04075,Q01433,P48728,P31939,Q13825,Q86X55,Q3L8U1,P50416,Q92793,P17812,Q9NRF8,Q8NHQ9,Q15125,Q13011,P30084,P68104,P06733,P22413,P34913,Q02790,Q13451,P11413,P22102,P23434,P06744,Q16774,O95479,Q16836,P40939,P55084,Q99714,P42858,P20839,P12268,Q9BY32,P48449,Q15648,P11586,Q6UB35,Q99707,Q15788,Q14686,P23511,P25208,O00567,Q9Y2X3,Q15…
HPA	kidney; collecting ducts[?Medium]	HPA:0271122	false	0.0118235	1.92726	463	147	18	11006	P28330,P16219,P45954,P24752,P49753,O00116,P43155,Q13011,P30084,O75521,P23378,Q16836,P35914,P25208,Q9Y2X3,P55809,P50897,P29401
HPA	kidney; collecting ducts[High]	HPA:0271123	false	0.0203843	1.6907	274	147	13	11006	P28330,P16219,P24752,P49753,Q13011,P30084,O75521,P23378,Q16836,P25208,Q9Y2X3,P55809,P50897
HPA	adrenal gland; glandular cells[?Low]	HPA:0020051	false	0.0406357	1.39109	7406	147	119	11006	Q86V21,P42765,P28330,P16219,P45954,P49748,P24752,Q9BWD1,P49753,O14734,Q99424,P33121,Q9ULC5,Q9UKU0,P55263,P30566,A0A024R5Q7,O75891,P04075,Q9UHK6,Q01433,P48728,P07741,P31939,Q13825,Q6FII3,Q86X55,P04040,Q3L8U1,P50416,Q92523,P43155,Q92793,P17812,Q9NRF8,Q16850,Q8NHQ9,Q15392,Q15125,Q13011,P30084,O75521,P68104,P06733,P34913,P37268,P14324,Q02790,Q13451,P11413,P22102,P23434,P06744,Q16774,O95479,Q16836,P40…
HPA	adrenal gland	HPA:0020000	false	0.0431903	1.36461	7413	147	119	11006	Q86V21,P42765,P28330,P16219,P45954,P49748,P24752,Q9BWD1,P49753,O14734,Q99424,P33121,Q9ULC5,Q9UKU0,P55263,P30566,A0A024R5Q7,O75891,P04075,Q9UHK6,Q01433,P48728,P07741,P31939,Q13825,Q6FII3,Q86X55,P04040,Q3L8U1,P50416,Q92523,P43155,Q92793,P17812,Q9NRF8,Q16850,Q8NHQ9,Q15392,Q15125,Q13011,P30084,O75521,P68104,P06733,P34913,P37268,P14324,Q02790,Q13451,P11413,P22102,P23434,P06744,Q16774,O95479,Q16836,P40…
HPA	adrenal gland; glandular cells[?Medium]	HPA:0020052	false	0.0435364	1.36115	6009	147	102	11006	Q86V21,P42765,P16219,P45954,P49748,P24752,Q9BWD1,P49753,O14734,Q99424,P33121,Q9UKU0,P30566,A0A024R5Q7,O75891,P04075,P48728,P07741,P31939,Q13825,Q6FII3,Q86X55,Q3L8U1,P50416,Q92793,Q9NRF8,Q8NHQ9,Q15392,Q15125,Q13011,P30084,O75521,P68104,P06733,P34913,P37268,P14324,Q02790,Q13451,P11413,P22102,P23434,P06744,Q16774,O95479,Q16836,P40939,P55084,P35914,P04035,P00492,Q99714,P51659,P56937,P86397,P42858,P20…
HPA	skin 1; cells in spinous layer[?Low]	HPA:0461411	false	0.0478145	1.32044	760	147	23	11006	P16219,P49748,P24752,P49753,P30566,P31939,Q13011,P30084,P06733,P22413,Q13451,P23434,Q16836,P55084,P00492,Q15800,O00567,Q9Y2X3,P55809,O60506,Q9BZK7,P29401,P04818
HPA	skin 1; cells in granular layer[?Low]	HPA:0460181	false	0.0490697	1.30919	711	147	22	11006	P16219,P49748,P24752,Q9BWD1,P49753,P30566,Q15392,Q13011,P30084,P06733,P22413,Q13451,Q16836,P55084,P00492,Q15800,Q15788,O00567,Q9Y2X3,P55809,O60506,Q9BZK7
CORUM	3-Hydroxyacyl CoA dehydrogenase	CORUM:7262	false	0.016673	1.77799	2	27	2	3383	P40939,P55084
CORUM	AGPS-GNPAT complex	CORUM:635	false	0.016673	1.77799	2	27	2	3383	O00116,O15228
CORUM	SRC-1 complex	CORUM:2728	false	0.0497724	1.30301	3	27	2	3383	Q92793,Q15788
HP	Abnormal circulating carboxylic acid concentration	HP:0004354	false	6.36e-11	10.1966	306	96	30	4856	P16219,P49748,P55263,P04075,P05062,Q9UHK6,P48728,P05067,Q14032,P37268,P11413,P23434,P23378,Q16836,P40939,P55084,P35914,Q99714,P12268,Q14739,Q9Y234,A6NK58,P42898,Q99707,P30613,P78330,Q9UL12,O75845,O43772,P37837
HP	Abnormal circulating metabolite concentration	HP:0032180	false	3.44e-07	6.46318	1261	96	54	4856	P16219,P49748,P24752,Q9BWD1,Q99424,P55263,Q8N142,P21549,P04075,P05062,Q9UHK6,P48728,P05067,P07741,Q14032,P50416,Q15392,Q15125,P13929,P22413,P34913,P37268,P11413,P23434,P23378,Q16836,P40939,P55084,P35914,P00492,Q99714,P51659,P42858,P12268,Q14739,P00338,Q9Y234,A6NK58,Q15800,P42898,Q99707,Q15738,P21589,O00628,P15259,O14832,P30613,P78330,Q9UL12,O75845,O43772,P37837,O60907,P29401
HP	Abnormal circulating lipid concentration	HP:0003119	false	1.96325e-05	4.70702	278	96	22	4856	P16219,P49748,Q99424,Q9UHK6,P50416,Q15392,Q15125,P34913,P37268,Q16836,P40939,P55084,P35914,P51659,P42858,Q15800,Q15738,O00628,O14832,O75845,O43772,O60907
HP	Abnormal circulating fatty-acid concentration	HP:0004359	false	4.43512e-05	4.35309	63	96	11	4856	P16219,P49748,Q9UHK6,Q16836,P40939,P55084,P35914,P51659,O00628,O14832,O43772
HP	Rhabdomyolysis	HP:0003201	false	0.000170524	3.76821	43	96	9	4856	P49748,P04075,Q9UHK6,P23109,P40939,P55084,P00338,P15259,O43772
HP	Hypoketotic hypoglycemia	HP:0001985	false	0.000368747	3.43327	15	96	6	4856	P49748,P50416,Q16836,P40939,P55084,O43772
HP	Abnormal urine metabolite level	HP:0033354	false	0.000841326	3.07504	526	96	28	4856	P16219,P49748,P24752,P04075,P05062,P48728,P07741,Q13825,P11413,P23434,P23378,Q16836,P40939,P55084,P35914,P00492,Q99714,P00338,Q9Y234,O95822,P42898,Q99707,Q9H0P0,P55809,P15259,Q9UL12,O43772,P29401
HP	Myoglobinuria	HP:0002913	false	0.00133132	2.87572	28	96	7	4856	P49748,P04075,Q16836,P40939,P55084,P00338,P15259
HP	Abnormality of urine homeostasis	HP:0003110	false	0.00158143	2.80095	679	96	32	4856	P16219,P49748,P24752,P21549,P04075,P05062,P48728,P07741,Q13825,P22413,P11413,P23434,P23378,Q16836,P40939,P55084,P35914,P00492,Q99714,P00338,Q9Y234,O95822,P42898,Q99707,Q9H0P0,P55809,P15259,Q9UL12,O43772,P36956,Q9BZK7,P29401
HP	Abnormal circulating proteinogenic amino acid concentration	HP:0033107	false	0.0024143	2.61721	92	96	11	4856	P55263,P48728,P23434,P23378,P12268,Q9Y234,P42898,Q99707,P78330,Q9UL12,P37837
HP	Hyperammonemia	HP:0001987	false	0.00292775	2.53347	59	96	9	4856	P49748,P24752,P50416,Q16836,P40939,P55084,P35914,Q99714,O43772
HP	Abnormal circulating carnitine concentration	HP:0010967	false	0.00354766	2.45006	32	96	7	4856	P16219,P49748,Q16836,P40939,P55084,P35914,O43772
HP	Abnormal circulating fatty-acid anion concentration	HP:0010966	false	0.00548993	2.26043	34	96	7	4856	P16219,P49748,Q16836,P40939,P55084,P35914,O43772
HP	Abnormality of metabolism/homeostasis	HP:0001939	false	0.00753171	2.12311	2445	96	70	4856	P16219,P45954,P49748,P24752,Q9BWD1,Q99424,P55263,Q8N142,P21549,P04075,P05062,Q9UHK6,P48728,P05067,P07741,P31939,Q13825,Q14032,P04040,P50416,P17812,Q15392,Q15125,P30084,P13929,P22413,P34913,P37268,P11413,P23434,P23378,P06744,Q16836,P40939,P55084,P35914,P00492,Q99714,P51659,P42858,P20839,P12268,Q14739,P00338,Q9Y234,A6NK58,O95822,Q15800,P11586,P42898,Q99707,Q15738,Q9H0P0,P21589,P55809,O00628,P15259,…
HP	Abnormal circulating amino acid concentration	HP:0003112	false	0.00947609	2.02337	149	96	13	4856	P55263,P48728,P05067,P23434,P23378,P12268,Q9Y234,A6NK58,P42898,Q99707,P78330,Q9UL12,P37837
HP	Recurrent singultus	HP:0100247	false	0.0124854	1.9036	3	96	3	4856	P48728,P23434,P23378
HP	Calcinosis cutis	HP:0025520	false	0.0124854	1.9036	3	96	3	4856	P21549,P22413,Q14739
HP	Abnormal circulating nitrogen compound concentration	HP:0004364	false	0.0146716	1.83352	155	96	13	4856	P49748,P24752,P05062,P07741,P50416,Q16836,P40939,P55084,P35914,P00492,Q99714,P21589,O43772
HP	Abnormal circulating acetylcarnitine concentration	HP:0012071	false	0.0166672	1.77814	16	96	5	4856	P16219,Q16836,P40939,P55084,O43772
HP	Coma	HP:0001259	false	0.0238913	1.62176	95	96	10	4856	P24752,P05062,P05067,Q13825,P50416,Q16836,P40939,P55084,P35914,O43772
HP	Increased proteinogenic amino acid level in urine	HP:0033100	false	0.0241956	1.61626	42	96	7	4856	P48728,P23434,P23378,Q9Y234,P42898,Q99707,Q9UL12
HP	Abnormal circulating monocarboxylic acid concentration	HP:0010996	false	0.0246499	1.60818	58	96	8	4856	P16219,P49748,Q16836,P40939,P55084,P35914,O43772,P37837
HP	Cholestasis	HP:0001396	false	0.0344772	1.46247	275	96	17	4856	P49748,P55263,P04075,P05062,Q9UHK6,Q14032,P00374,P11413,P06744,P40939,P55084,P35914,P51659,Q14739,P30613,O75845,P60174
HP	Azotemia	HP:0002157	false	0.035783	1.44632	144	96	12	4856	P49748,P24752,P05062,P07741,P50416,Q16836,P40939,P55084,P35914,P00492,Q99714,O43772
HP	Acidosis	HP:0001941	false	0.0478222	1.32037	373	96	20	4856	P16219,P49748,P24752,Q9BWD1,P21549,P05062,P07741,Q13825,P50416,P30084,Q16836,P40939,P55084,P35914,Q99714,P00338,Q9Y234,A6NK58,O95822,P55809
